# Supplementary material for: The Optimal Adjuvant Strategy of Aidi Injection With Gemcitabine and Cisplatin in Advanced Non–small Cell Lung Cancer: A Meta-analysis of 70 Randomized Controlled Trials
Source: PubMed Central journal article supplement (PMC8194277; doi:10.3389/fphar.2021.582447), 2021-05-28
Supplement: DataSheet1.pdf [file DataSheet1.pdf]

## Supplementary material 4. Subgroup analysis results of peripheral blood lymphocytes levels (Figures S1-24)

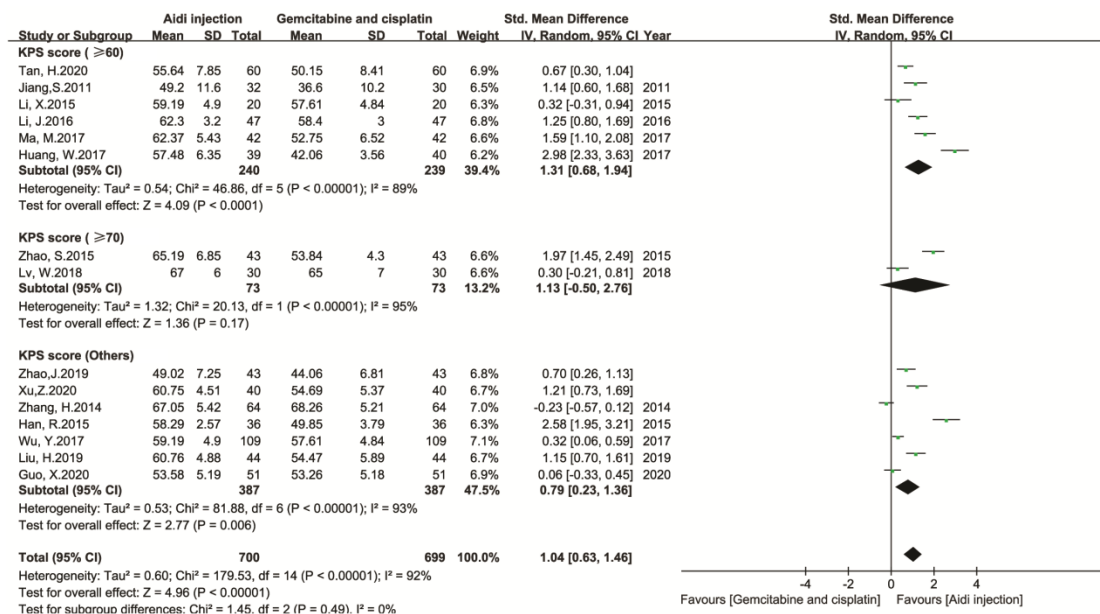

Figure S1 Subgroups analysis of CD3<sup>+</sup> T cells by KPS score

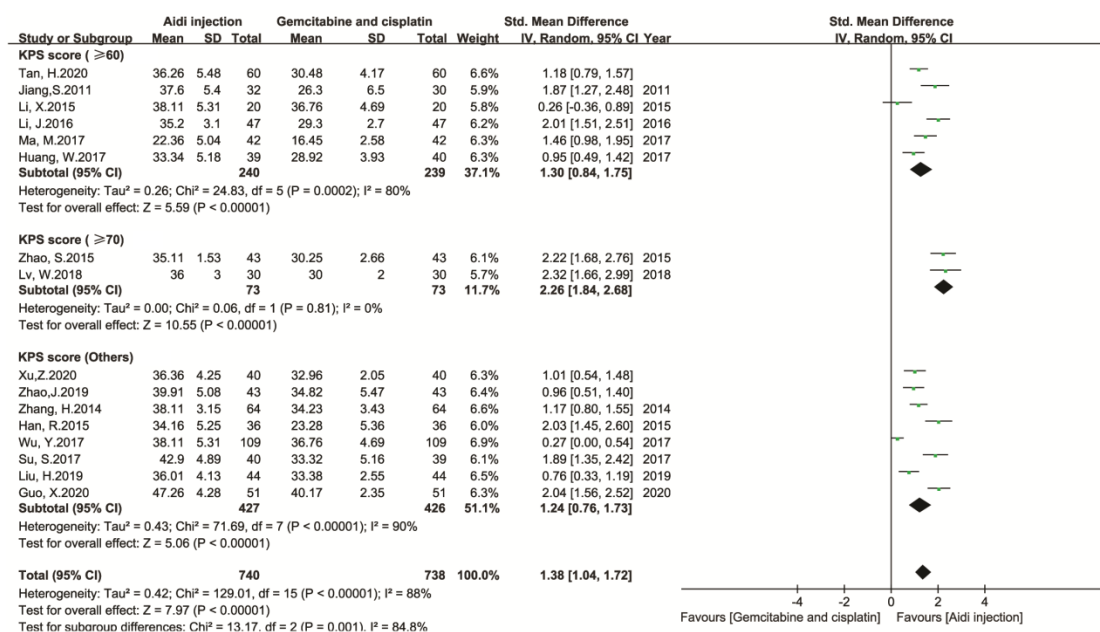

Figure S2 Subgroups analysis of CD3<sup>+</sup> CD4<sup>+</sup> T cells by KPS score

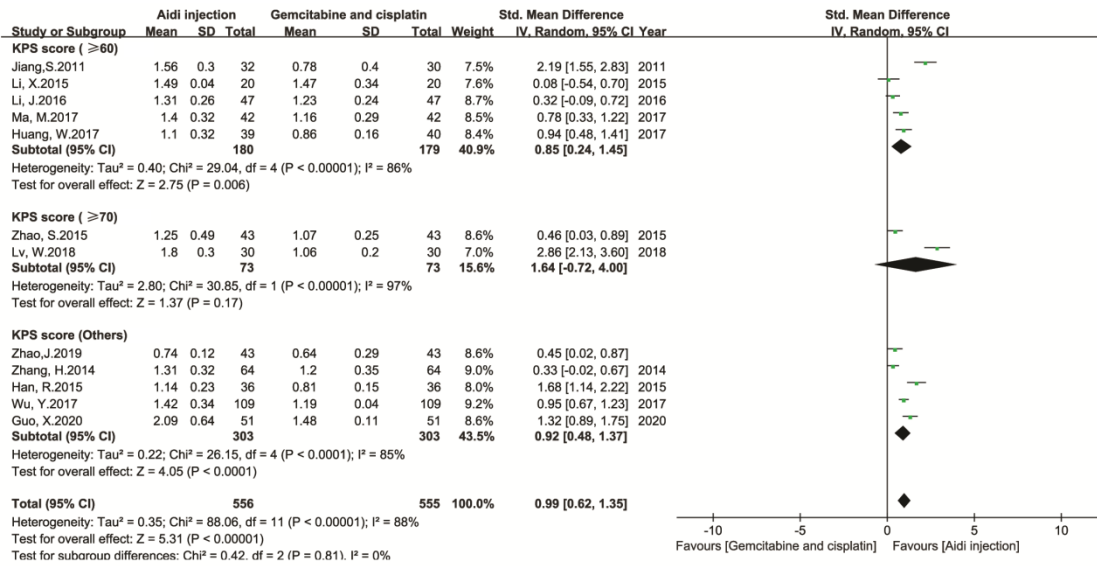

**Figure S3 Subgroups analysis of CD4<sup>+</sup>/CD8<sup>+</sup> T cells by KPS score**

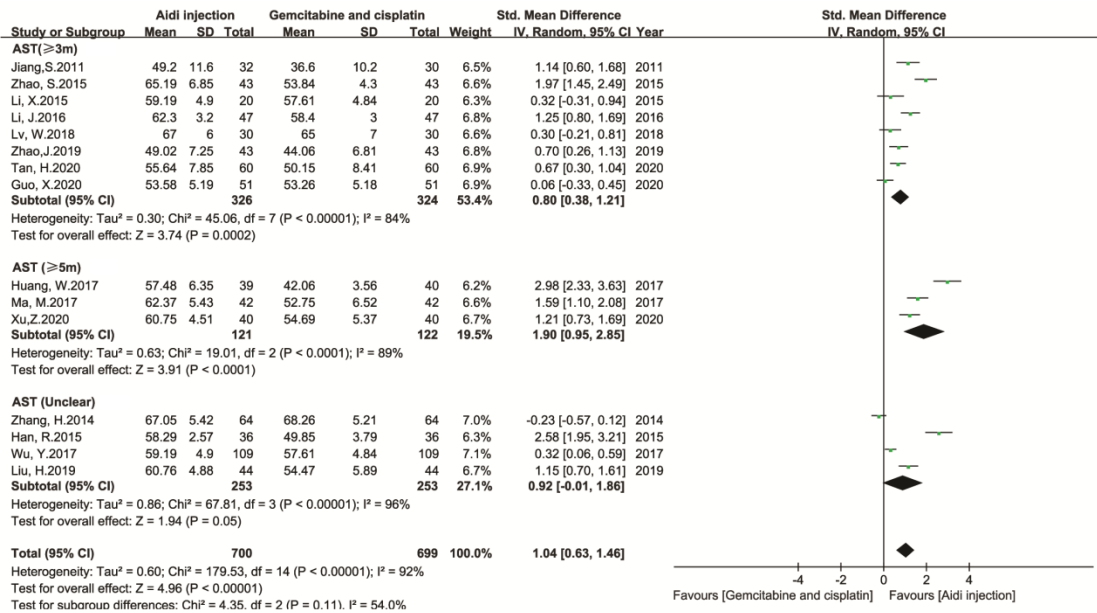

**Figure S4 Subgroups analysis of CD3<sup>+</sup> T cells by anticipated survival time**

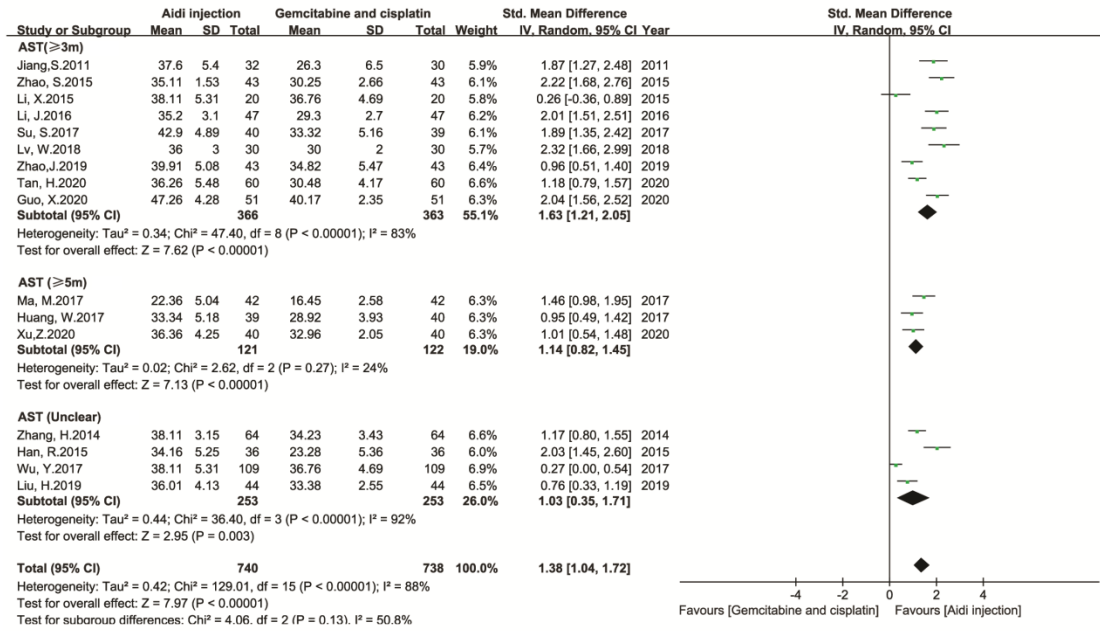

Figure S5 Subgroups analysis of CD3<sup>+</sup> CD4<sup>+</sup> T cells by anticipated survival time

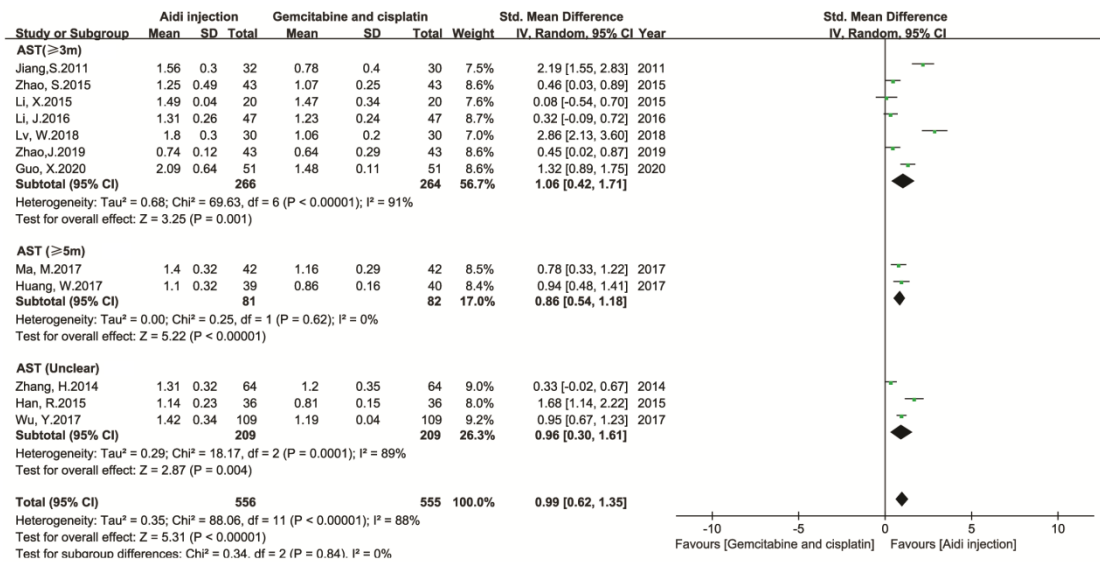

Figure S6 Subgroups analysis of CD4<sup>+</sup>/CD8<sup>+</sup> T cells by anticipated survival time

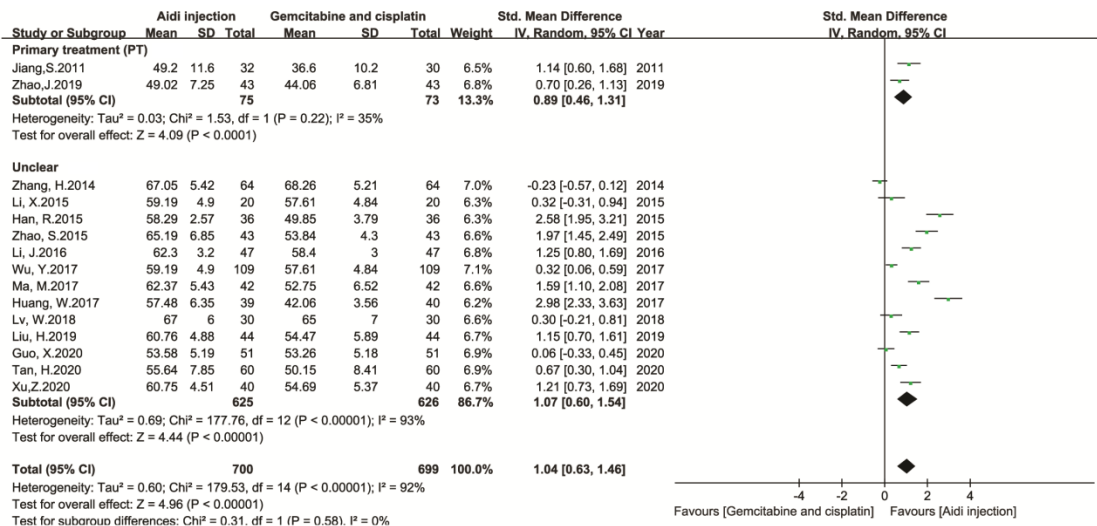

Figure S7 Subgroups analysis of CD3<sup>+</sup> T cells by treatment process

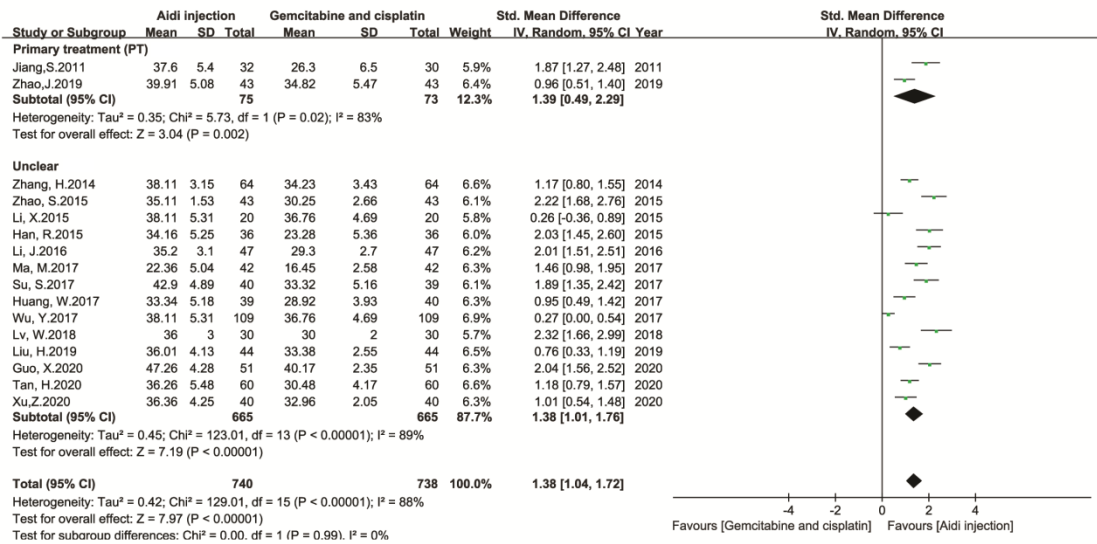

Figure S8 Subgroups analysis of CD3<sup>+</sup> CD4<sup>+</sup> T cells by treatment process

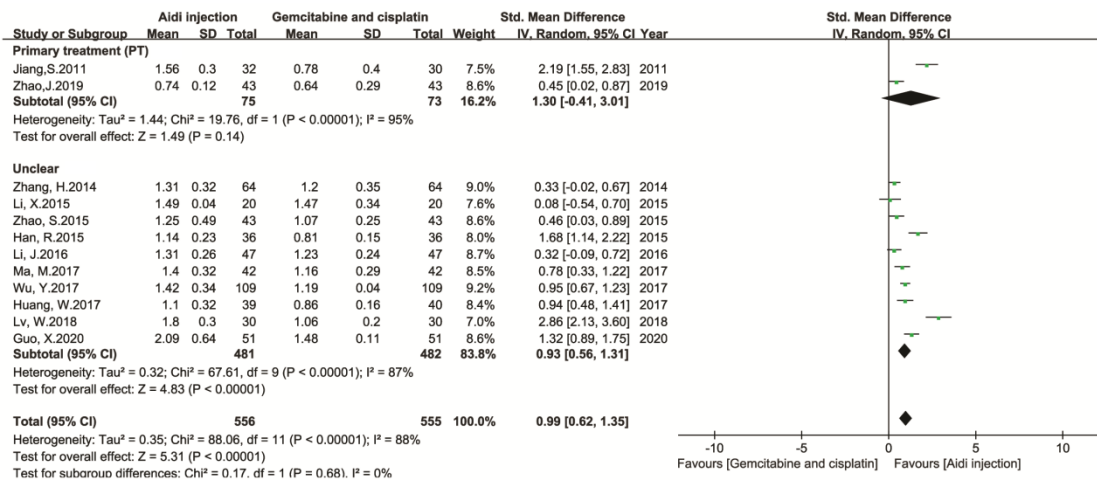

Figure S9 Subgroups analysis of CD4<sup>+</sup>/CD8<sup>+</sup> T cells by treatment process

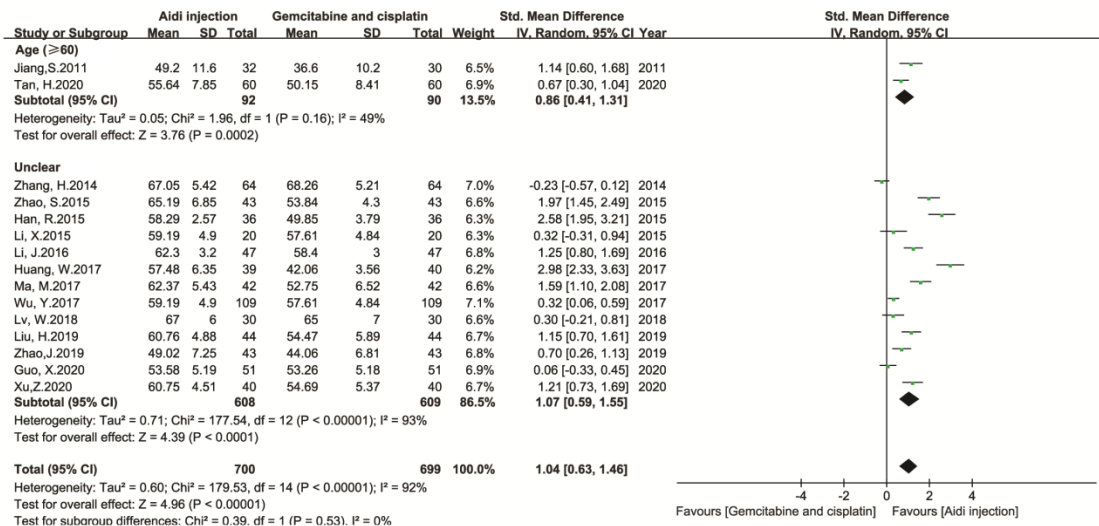

Figure S10 Subgroups analysis of CD3<sup>+</sup> T cells by age

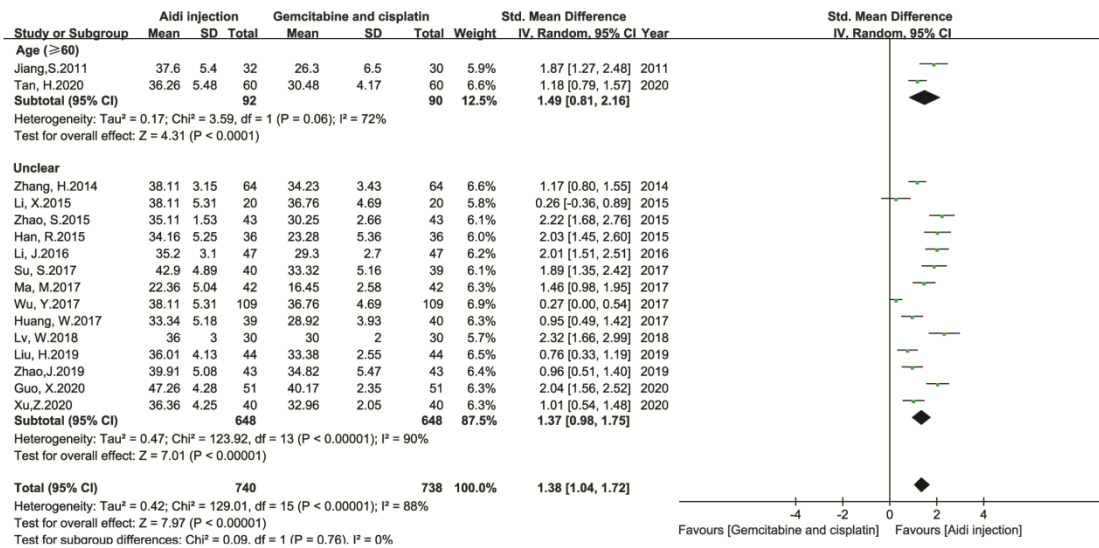

Figure S11 Subgroups analysis of CD3<sup>+</sup> CD4<sup>+</sup> T cells by age

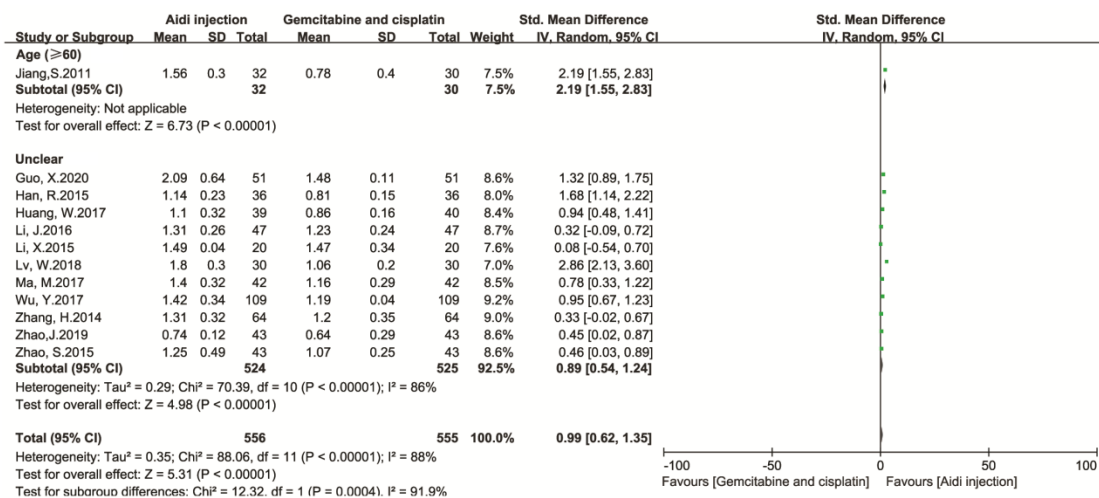

Figure S12 Subgroups analysis of CD4<sup>+</sup>/CD8<sup>+</sup> T cells by age

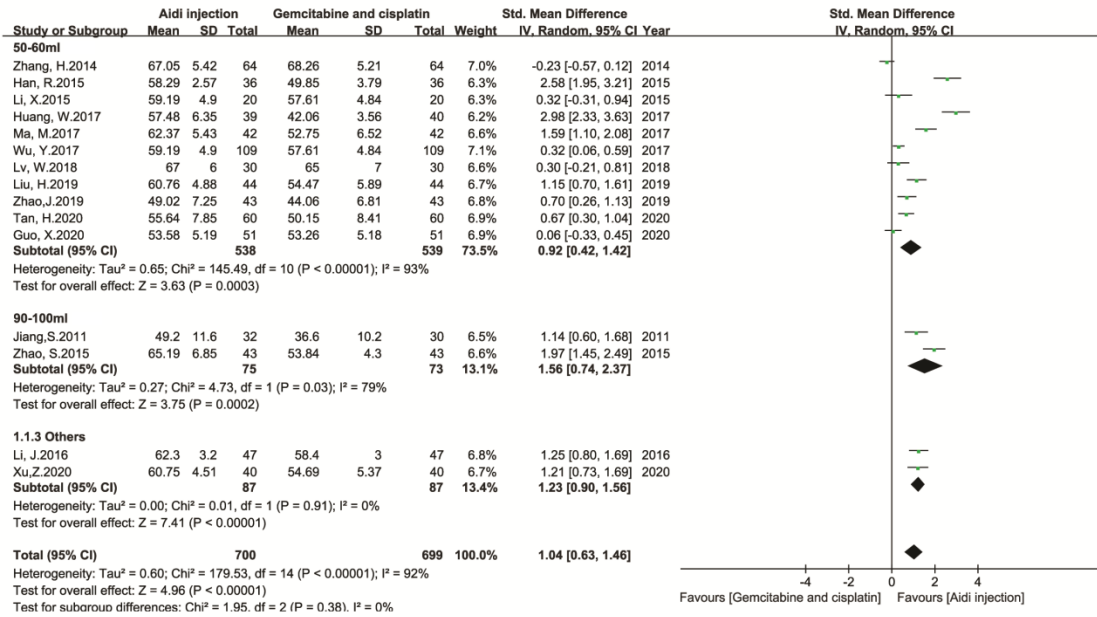

Figure S13 Subgroups analysis of CD3<sup>+</sup> T cells by dosage of Aidi injection

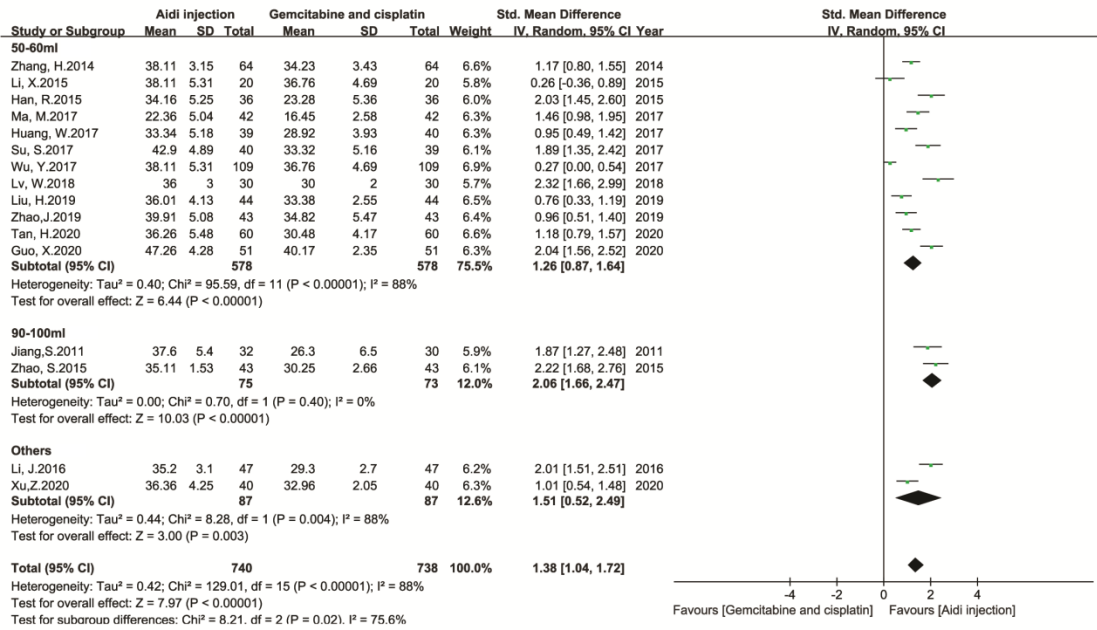

Figure S14 Subgroups analysis of CD3<sup>+</sup> CD4<sup>+</sup> T cells by dosage of Aidi injection

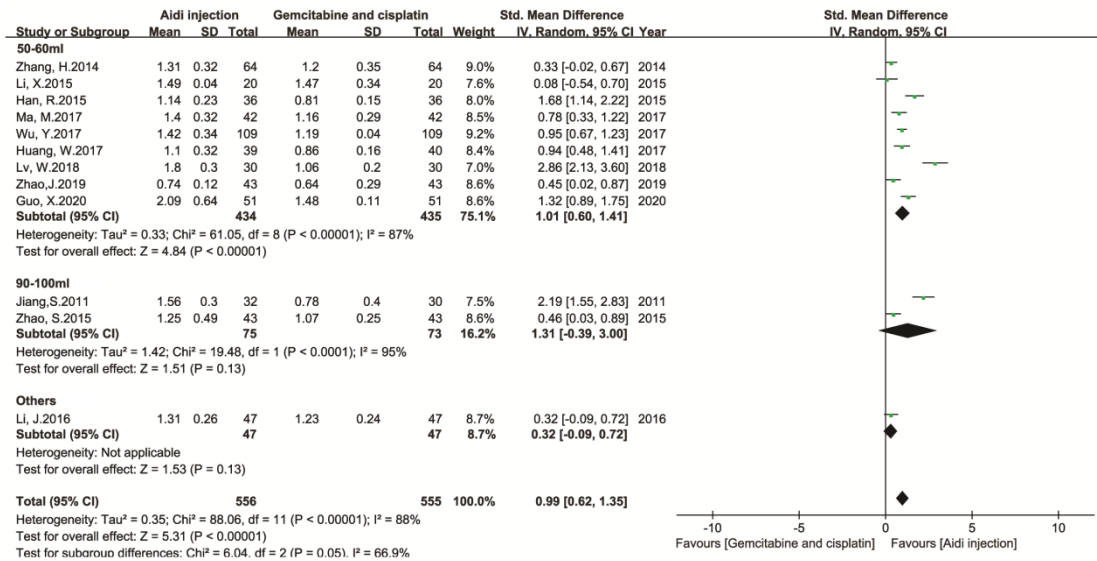

**Figure S15 Subgroups analysis of CD4<sup>+</sup>/CD8<sup>+</sup> T cells by dosage of Aidi injection**

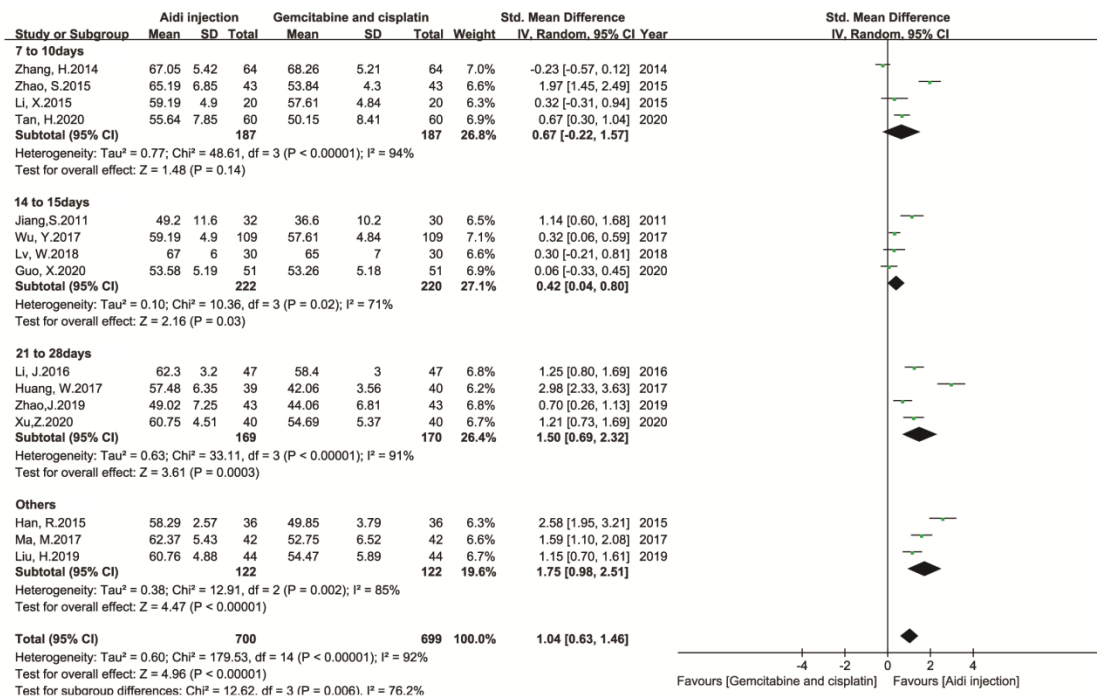

**Figure S16 Subgroups analysis of CD3<sup>+</sup> T cells by treatment time**

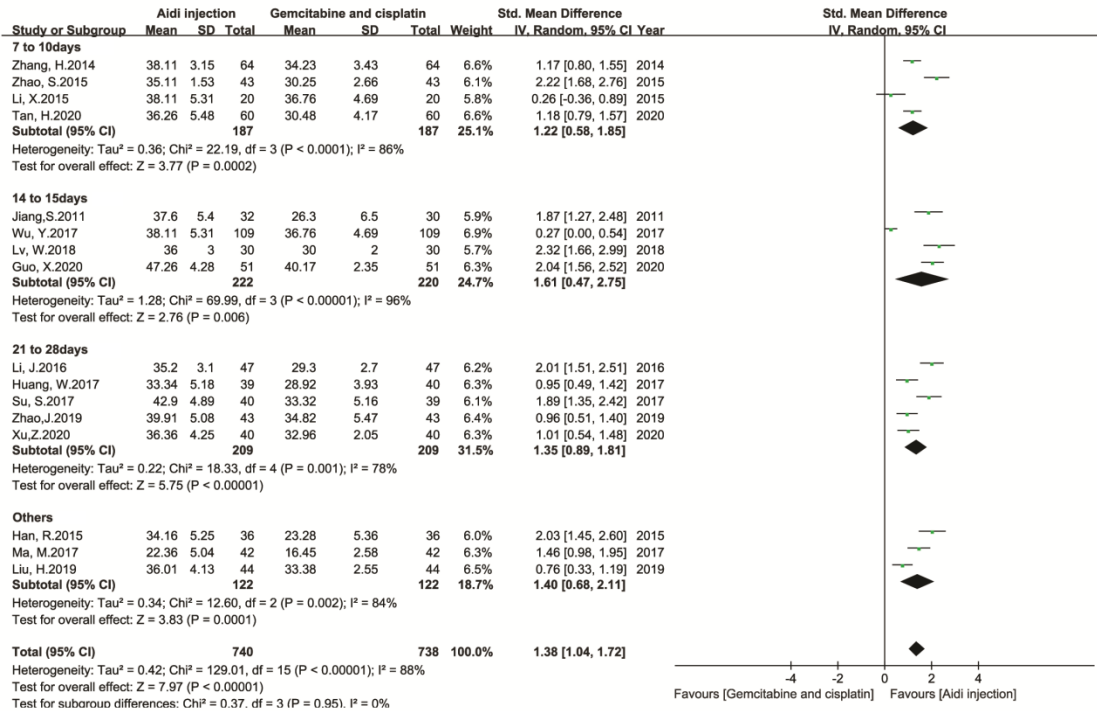

Figure S17 Subgroups analysis of CD3<sup>+</sup> CD4<sup>+</sup> T cells by treatment time

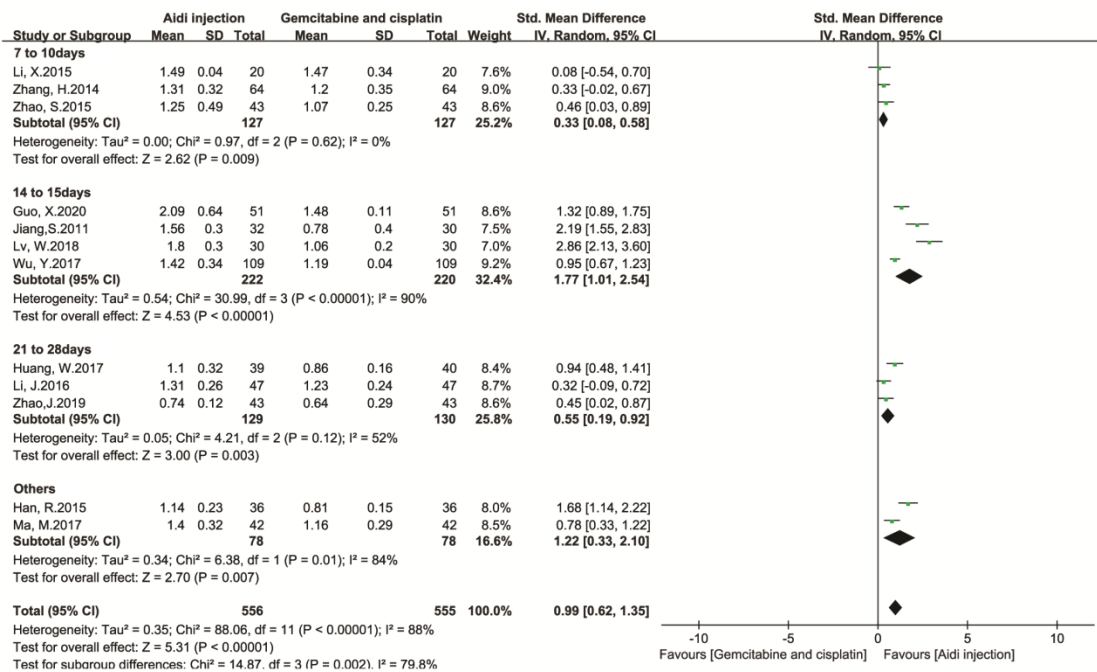

Figure S18 Subgroups analysis of CD4<sup>+</sup>/CD8<sup>+</sup> T cells by treatment time



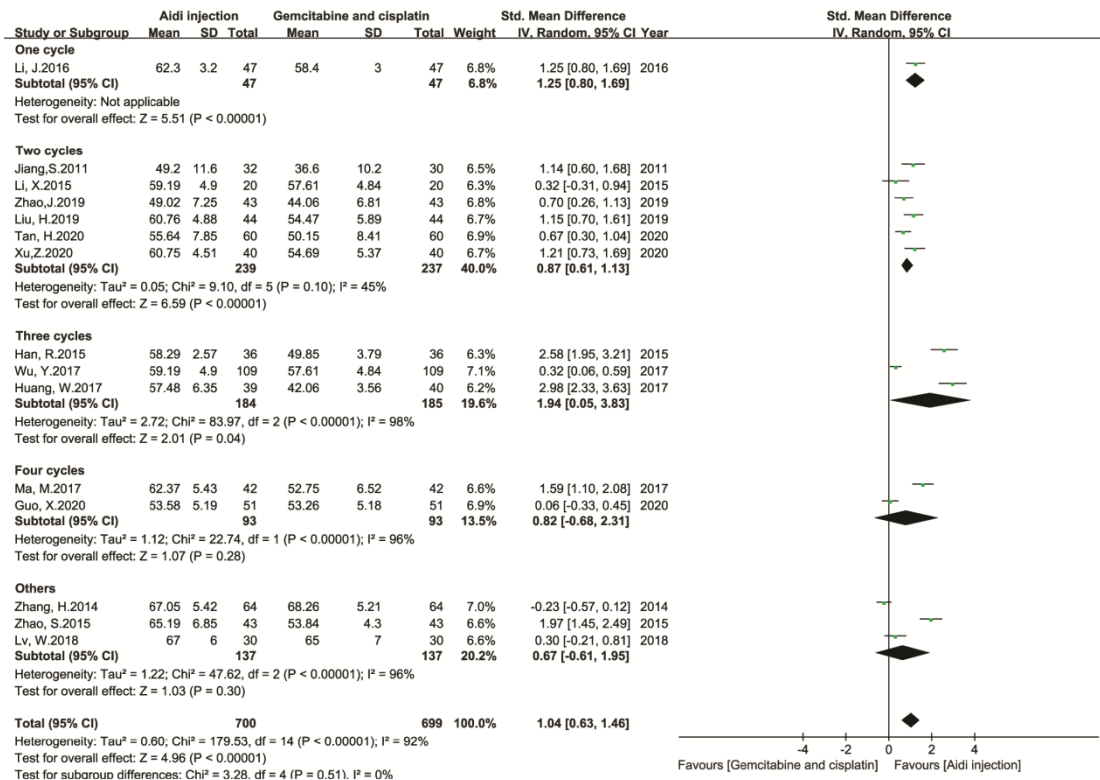

Figure S19 Subgroups analysis of CD3<sup>+</sup> T cells by treatment cycle

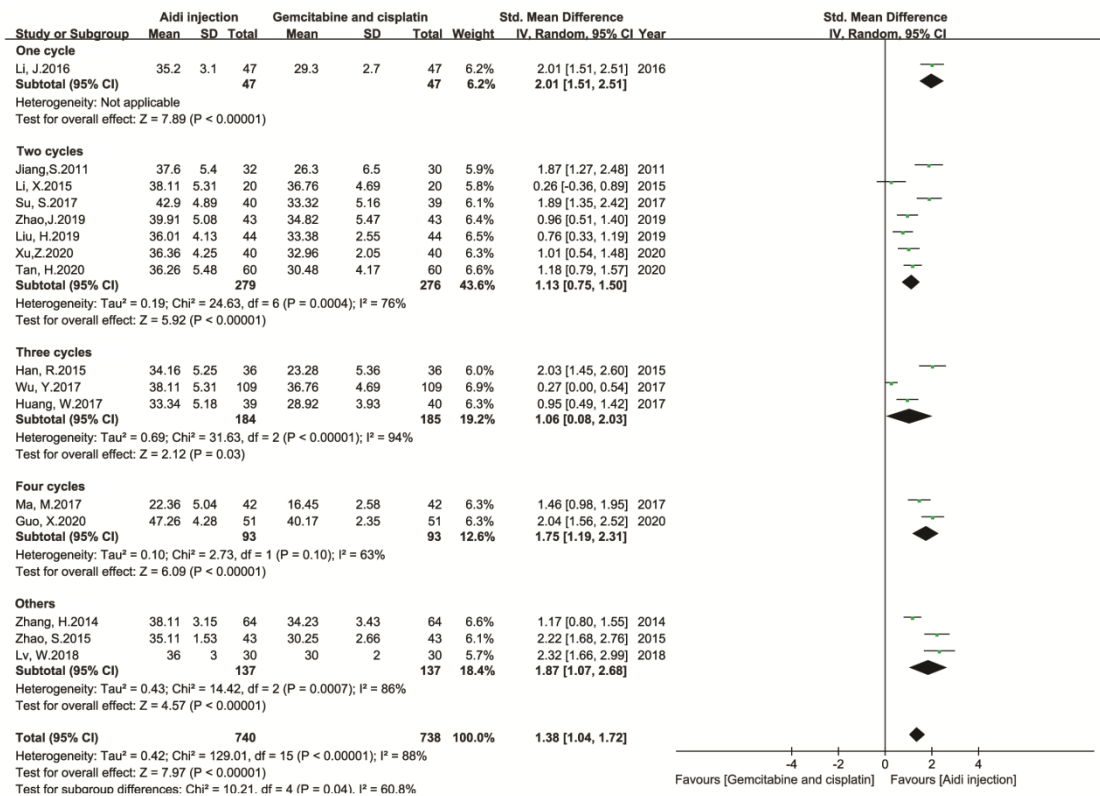

Figure S20 Subgroups analysis of CD3<sup>+</sup> CD4<sup>+</sup> T cells by treatment cycle

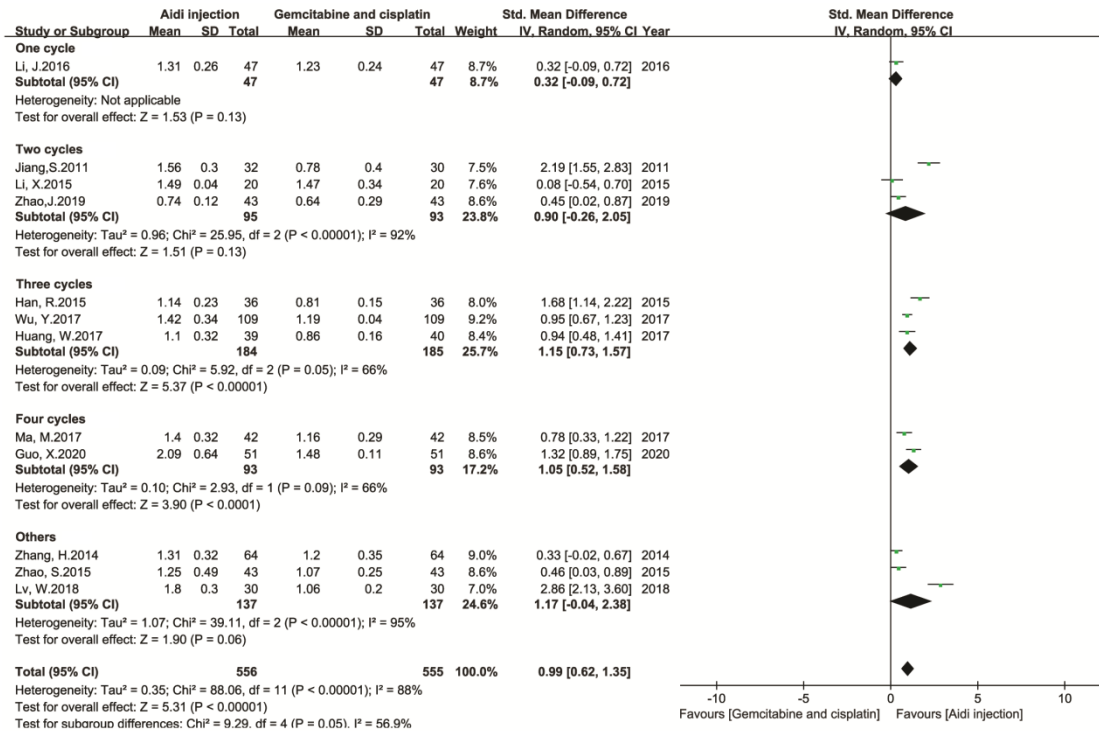

**Figure S21 Subgroups analysis of CD4<sup>+</sup>/CD8<sup>+</sup> T cells by treatment cycle**

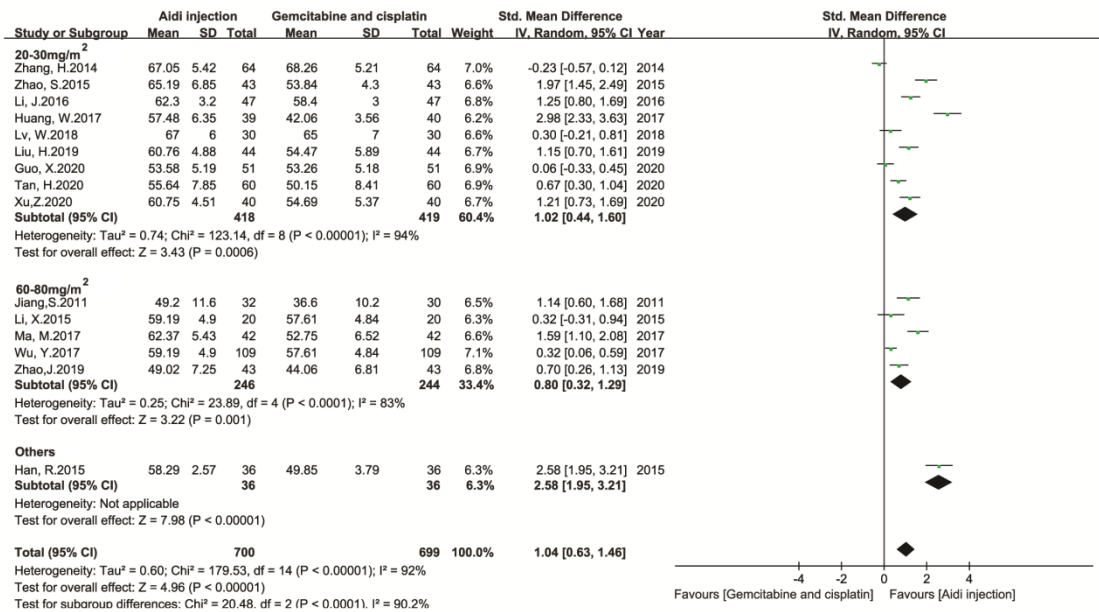

**Figure S22 Subgroups analysis of CD3<sup>+</sup> T cells by cisplatin dosage**

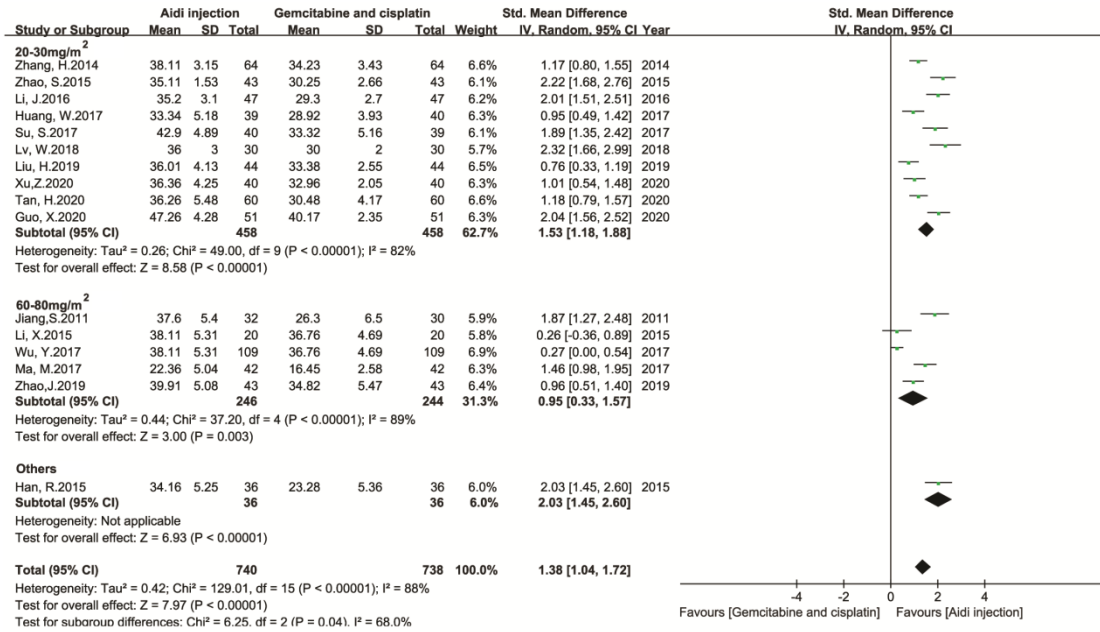

**Figure S23 Subgroups analysis of CD3<sup>+</sup> CD4<sup>+</sup> T cells by cisplatin dosage**

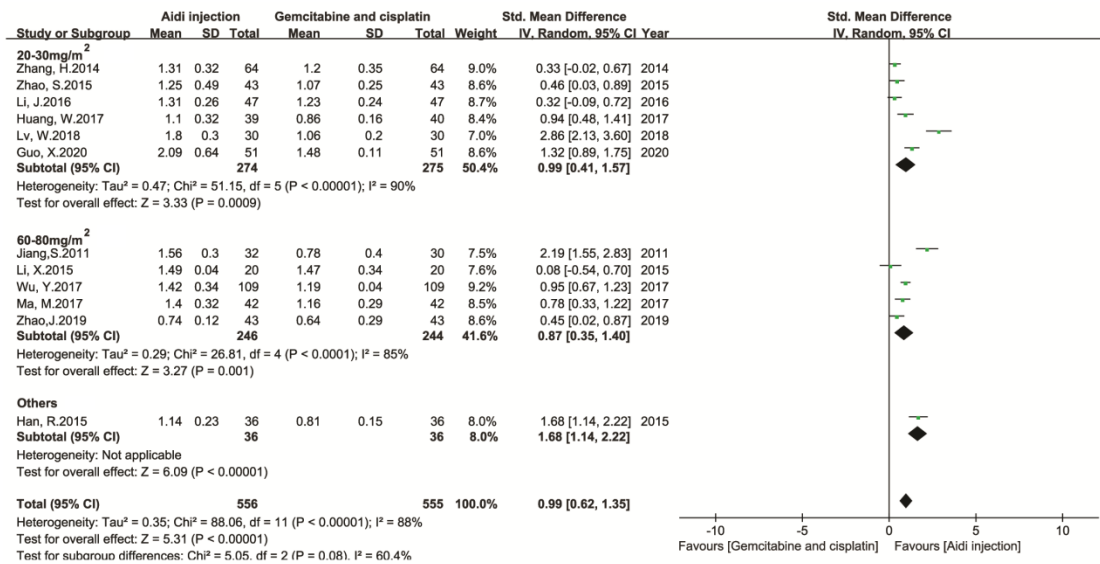

**Figure S24 Subgroups analysis of CD4<sup>+</sup>/CD8<sup>+</sup> T cells by cisplatin dosage**
