# Supplementary material for: The Optimal Adjuvant Strategy of Aidi Injection With Gemcitabine and Cisplatin in Advanced Non–small Cell Lung Cancer: A Meta-analysis of 70 Randomized Controlled Trials
Source: PubMed Central journal article supplement (PMC8194277; doi:10.3389/fphar.2021.582447), 2021-05-28
Supplement: DataSheet3.pdf [file DataSheet3.pdf]

## Supplementary material 6. Subgroup and meta-regression analysis results (Figures S35-106)

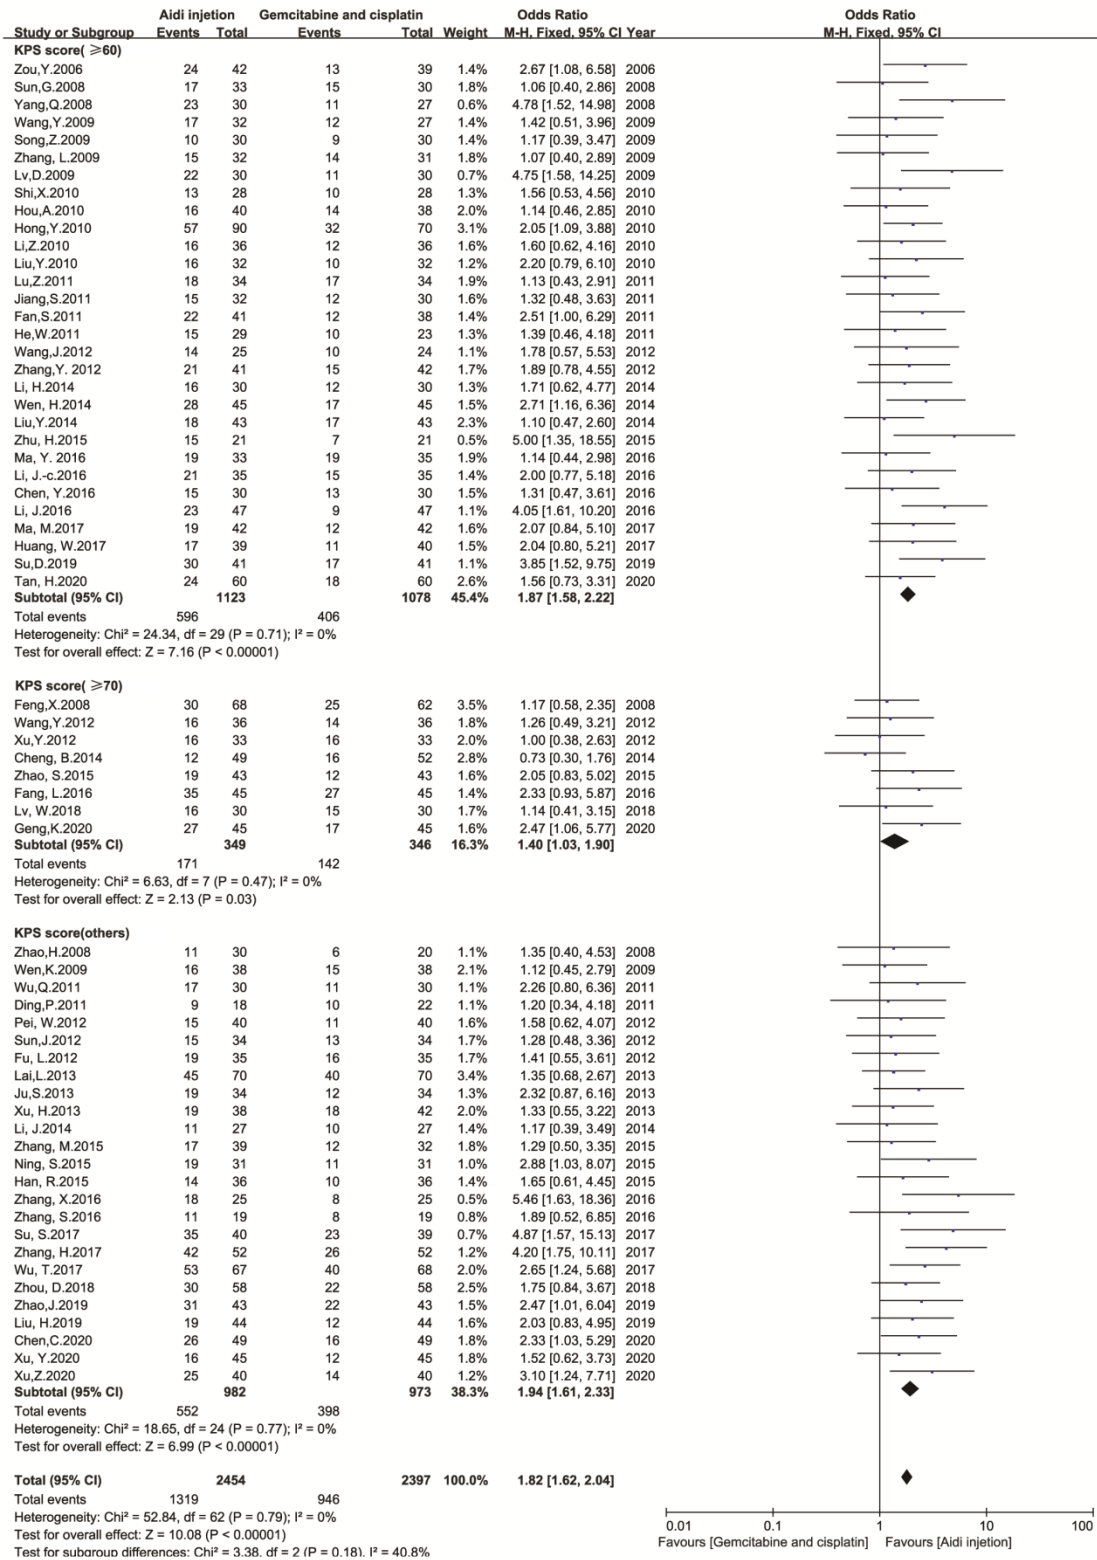

Figure S35 Subgroups analysis of objective response rate by KPS score

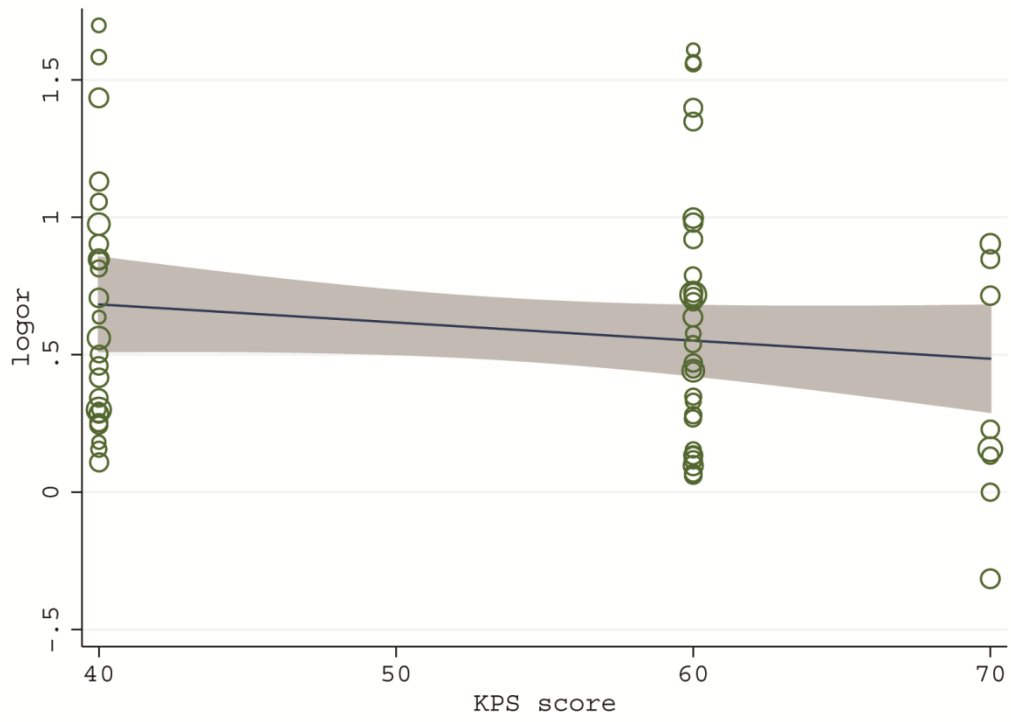

**Figure S36 Meta-regression of objective response rate by KPS score**

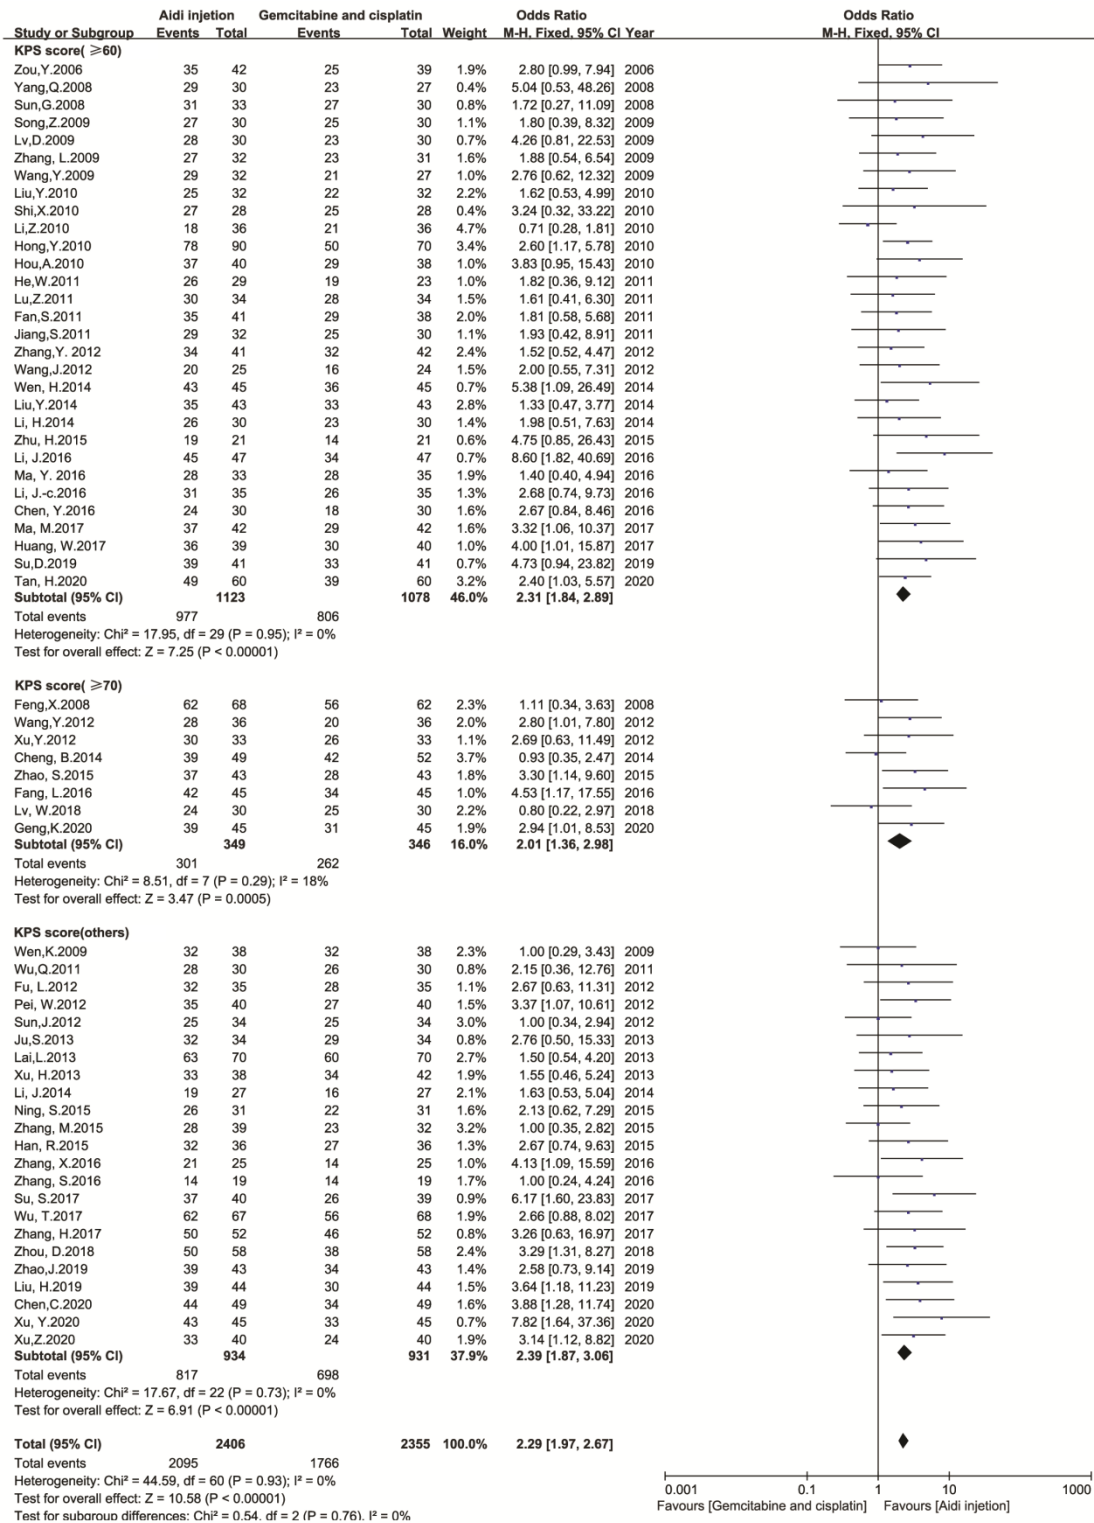

Figure S37 Subgroups analysis of disease control rate by KPS score

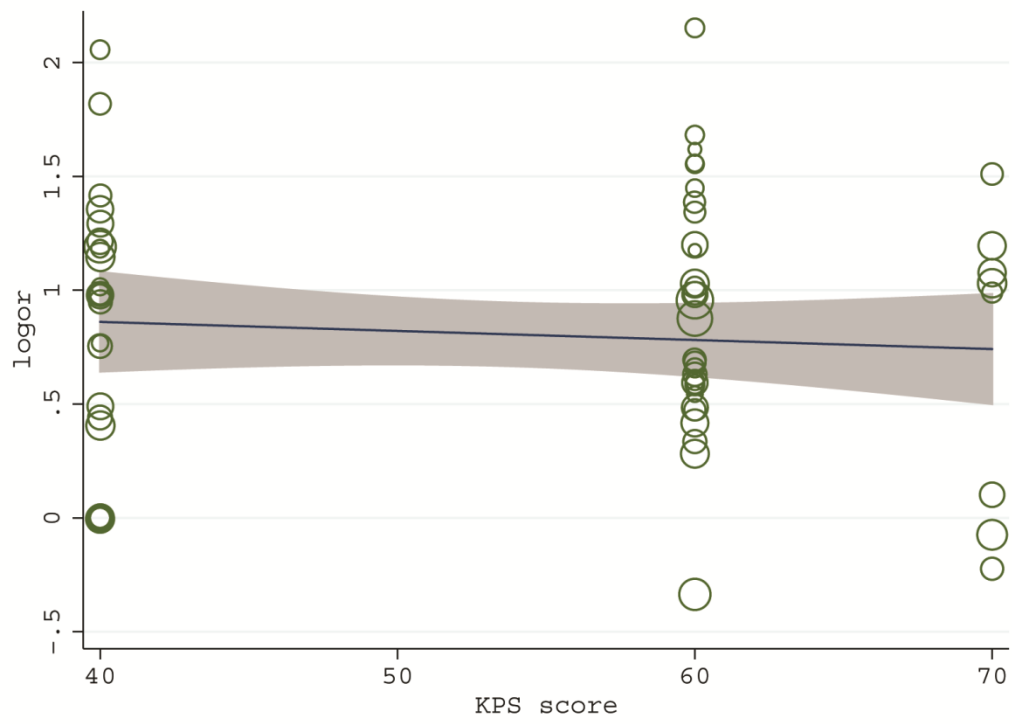

**Figure S38 Meta-regression of disease control rate by KPS score**

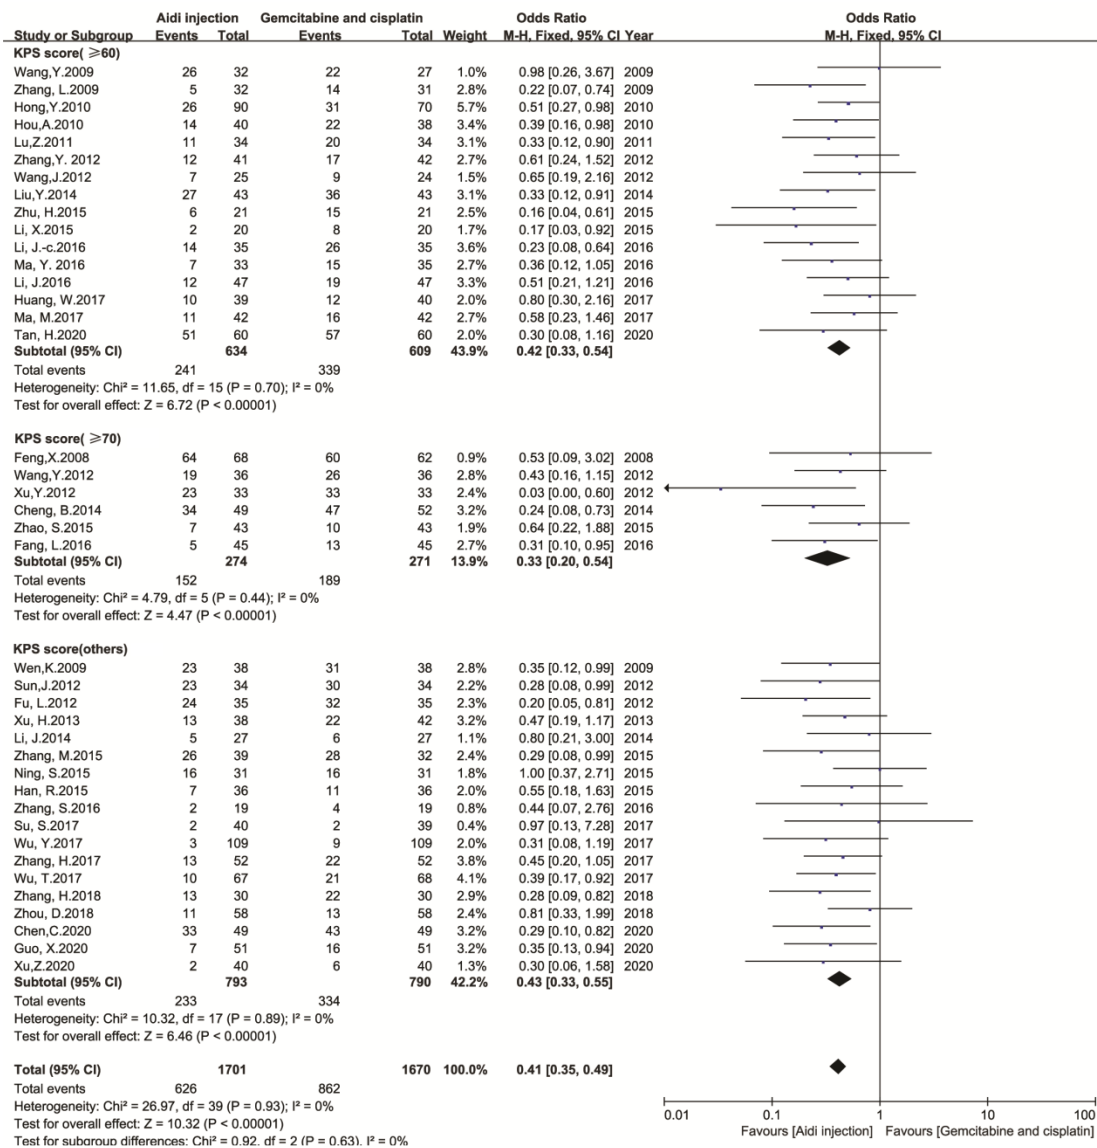

**Figure S39 Subgroups analysis of neutropenia by KPS score**

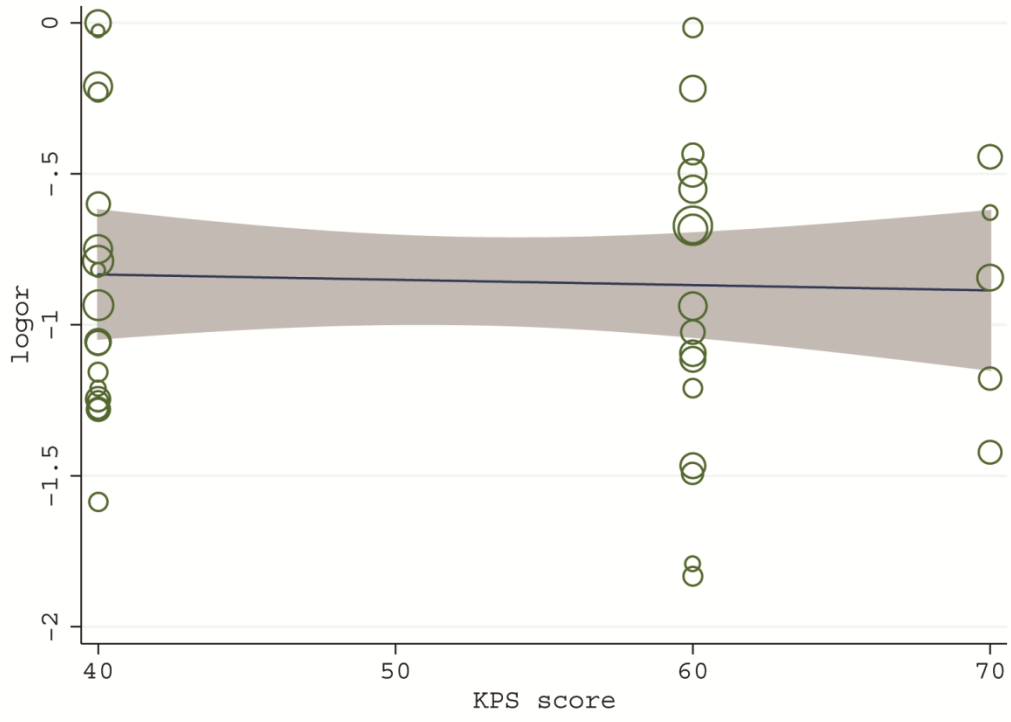

**Figure S40 Meta-regression of neutropenia by KPS score**

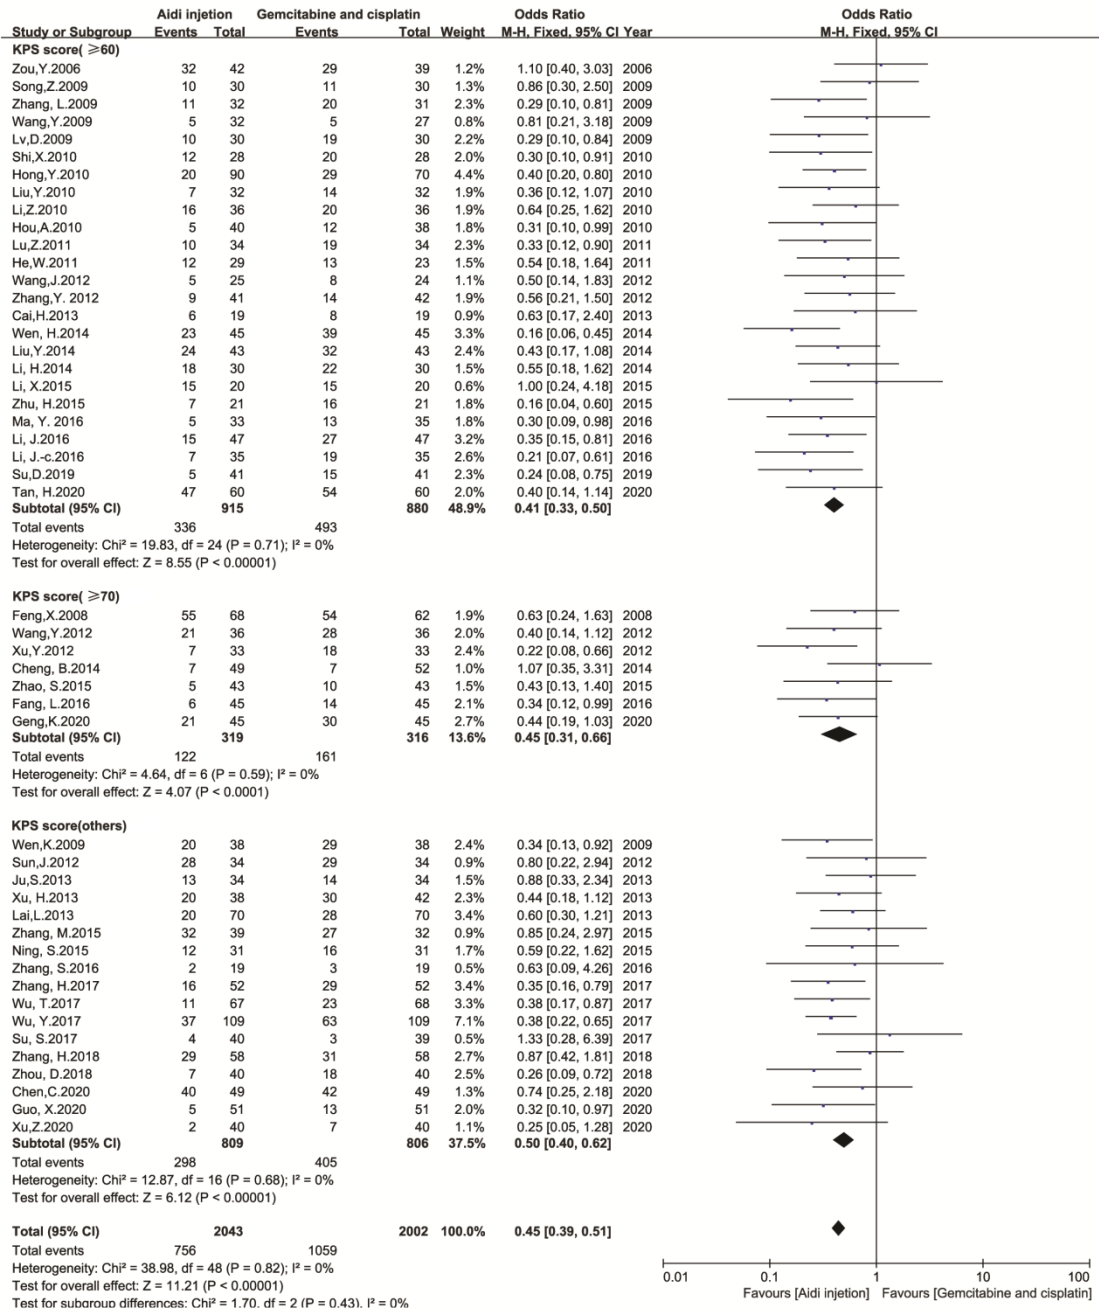

Figure S41 Subgroups analysis of gastrointestinal reaction by KPS score

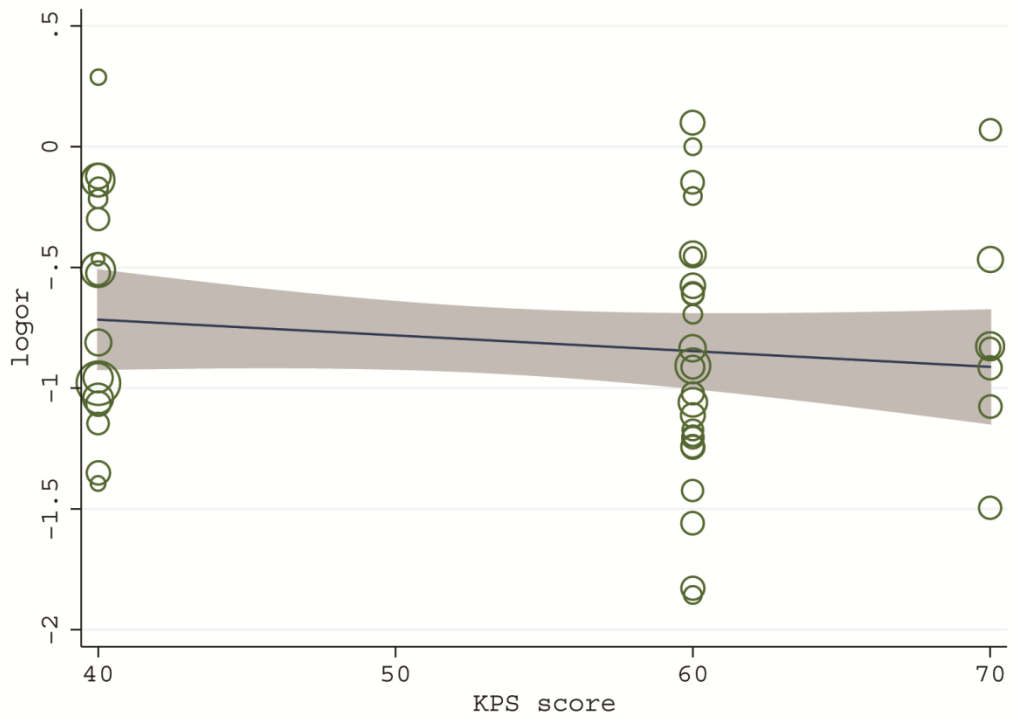

**Figure S42 Meta-regression of gastrointestinal reaction by KPS score**



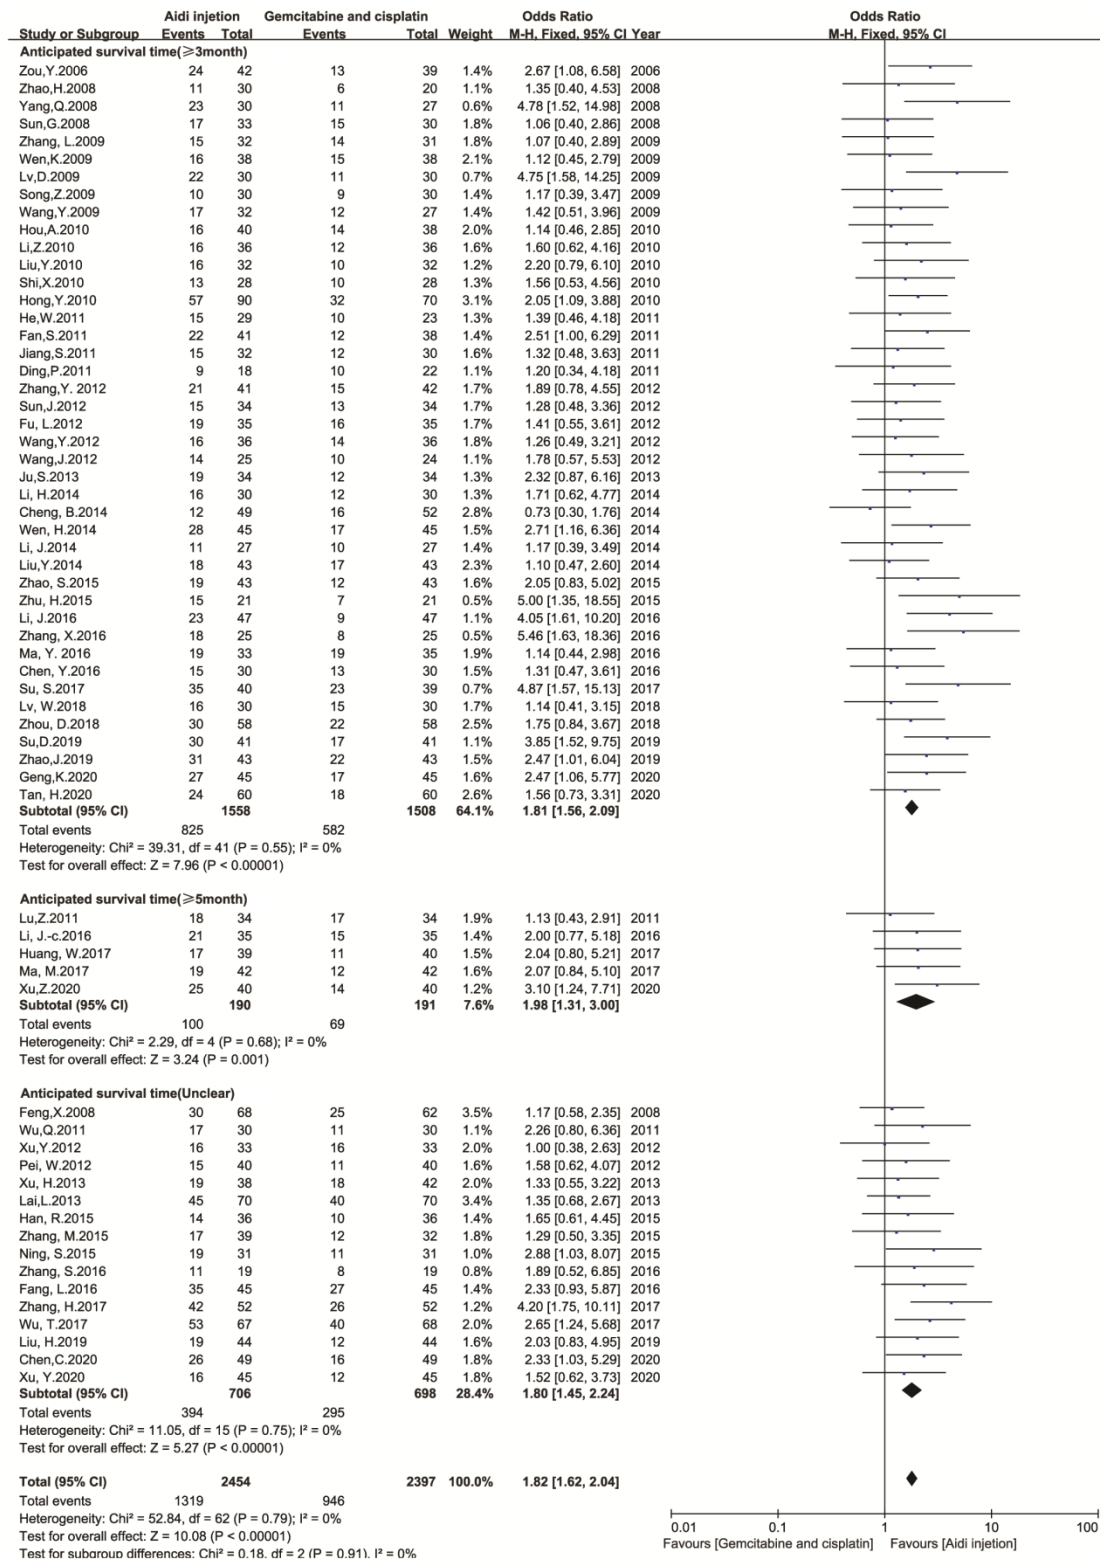

Figure S43 Subgroups analysis of objective response rate by anticipated survival time

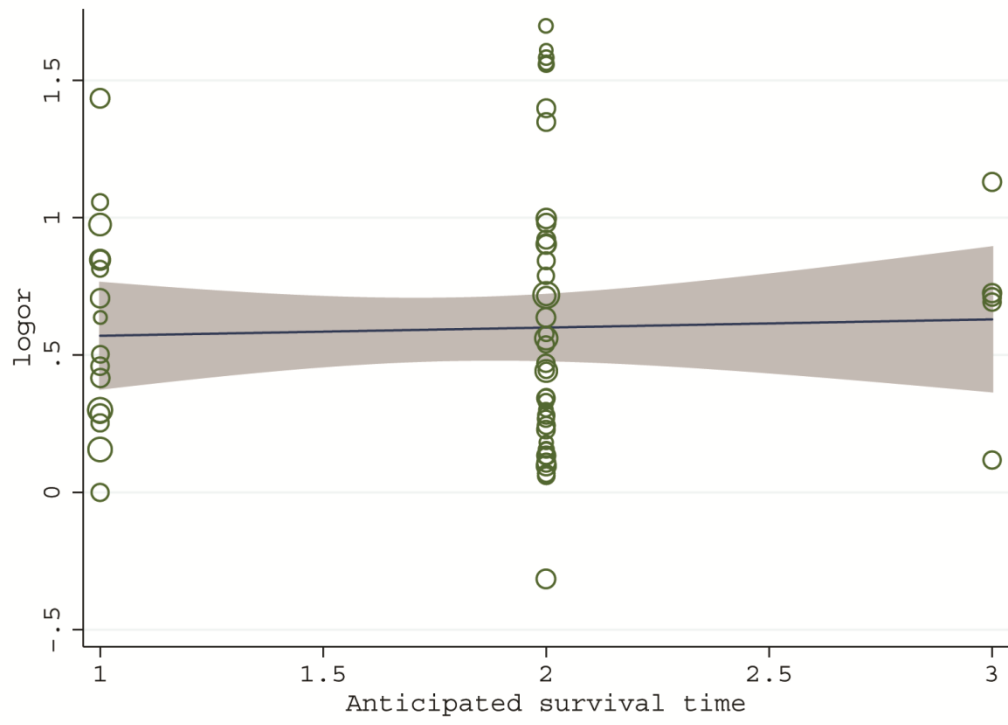

**Figure S44 Meta-regression of objective response rate by anticipated survival time**

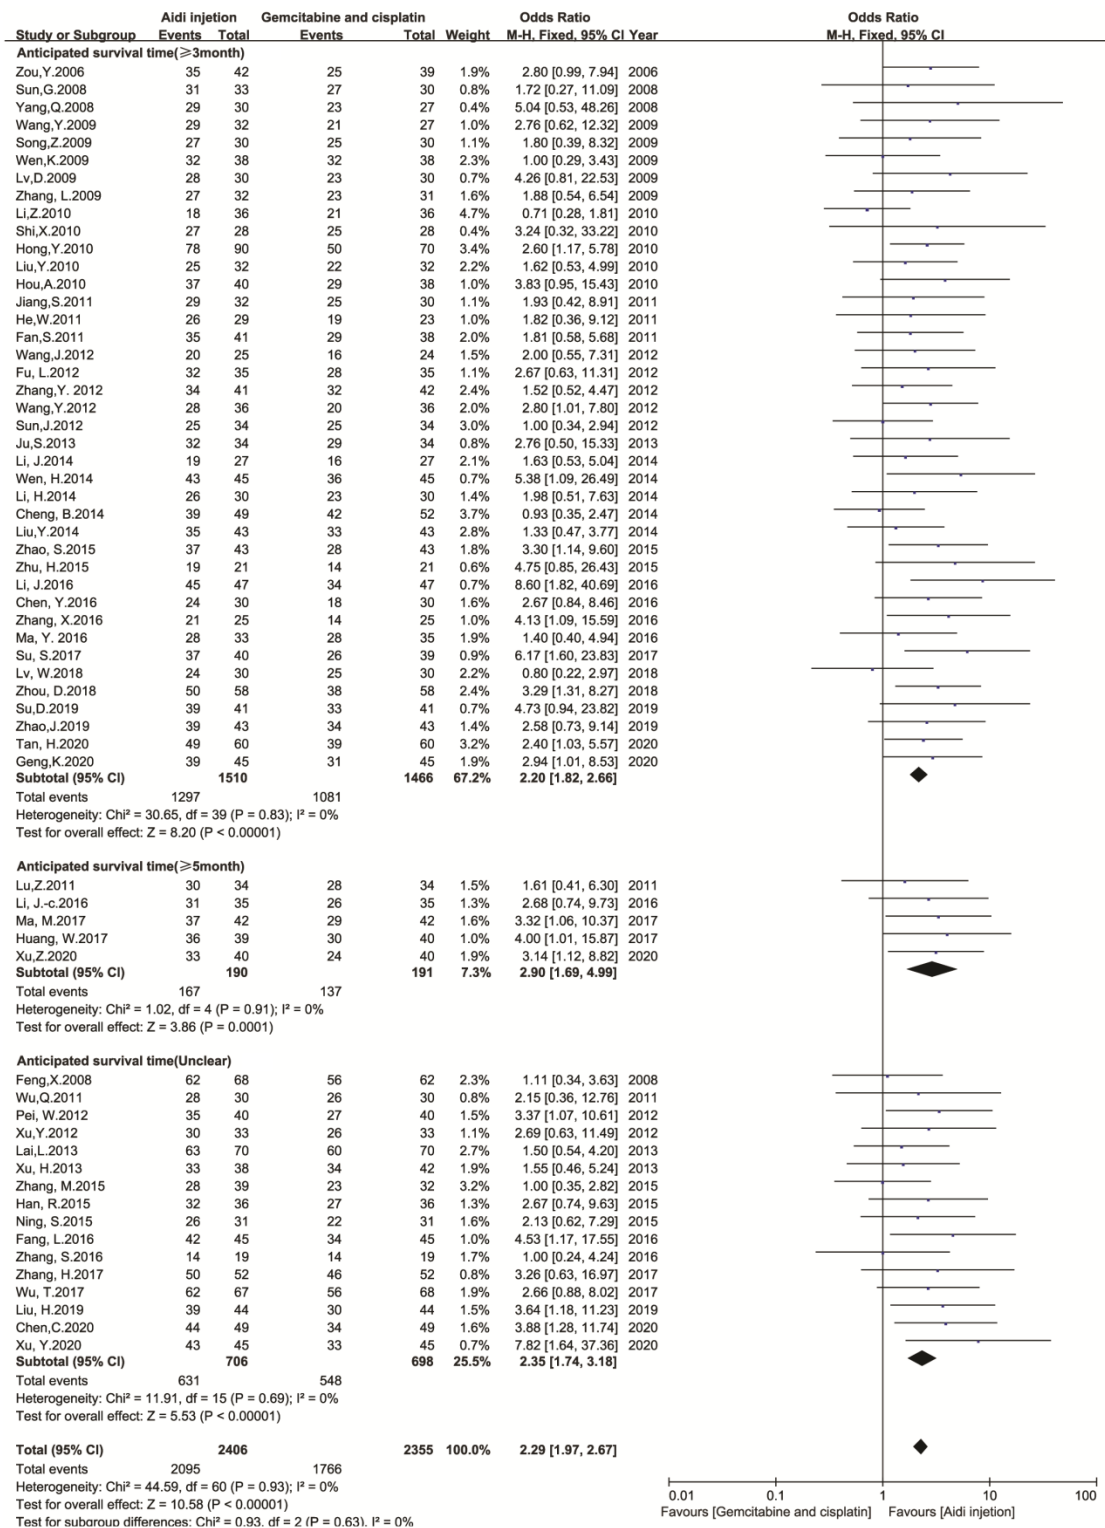

Figure S45 Subgroups analysis of disease control rate by anticipated survival time

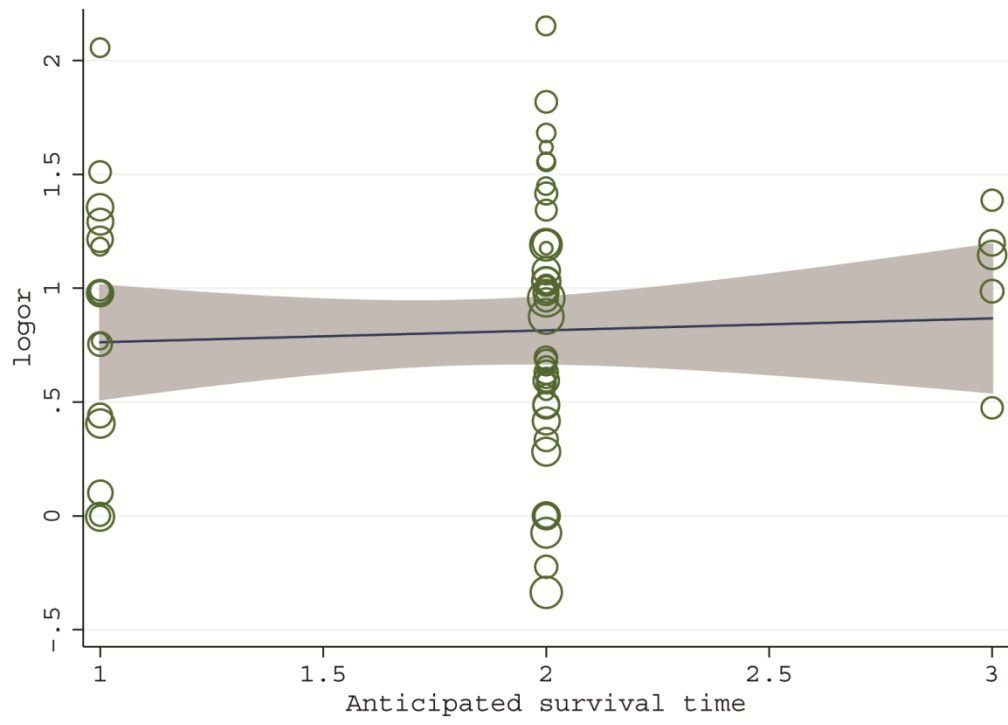

**Figure S46 Meta-regression of disease control rate by anticipated survival time**

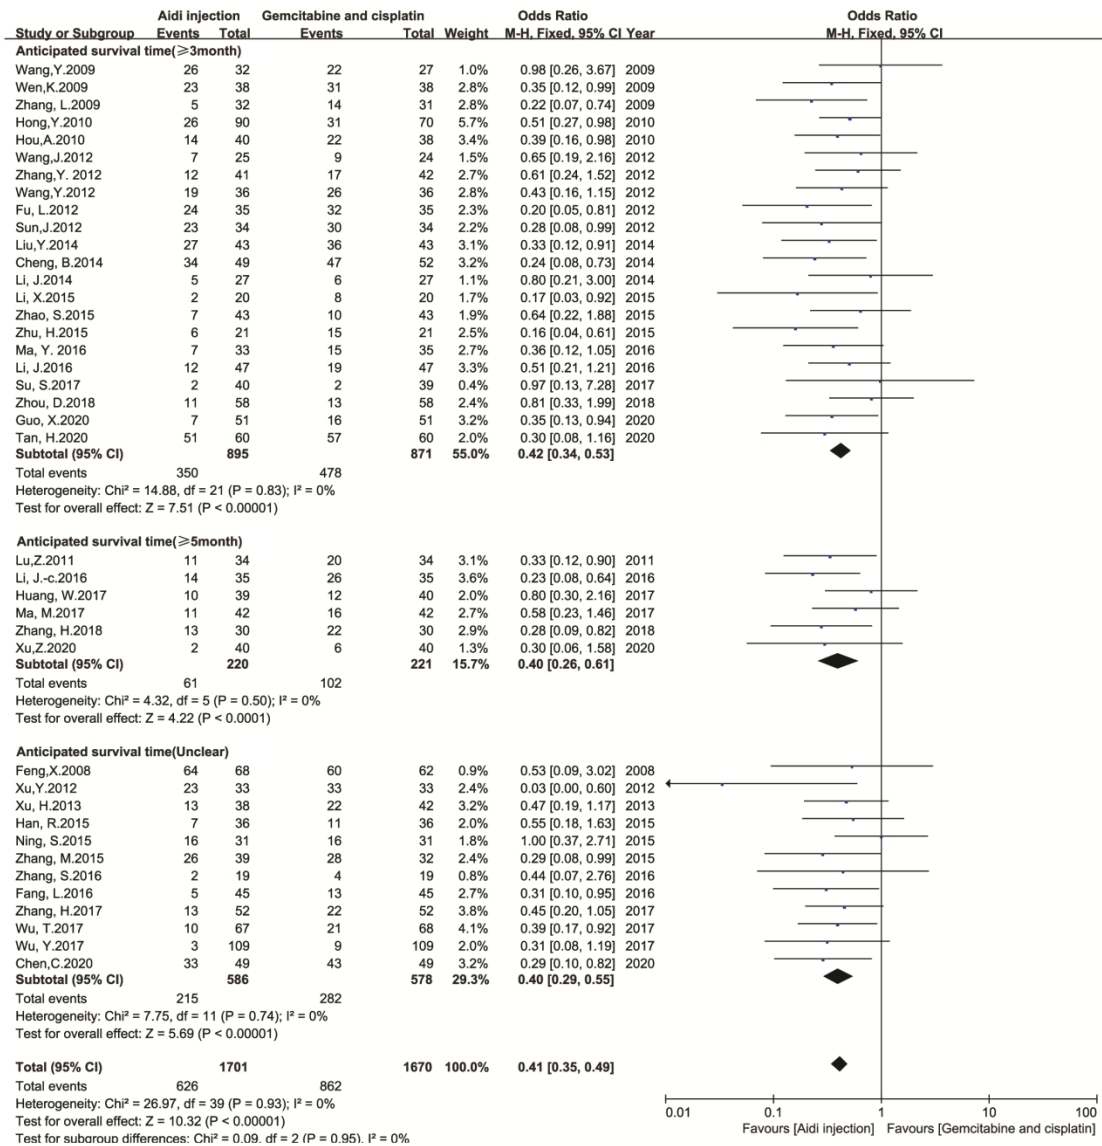

**Figure S47 Subgroups analysis of neutropenia by anticipated survival time**

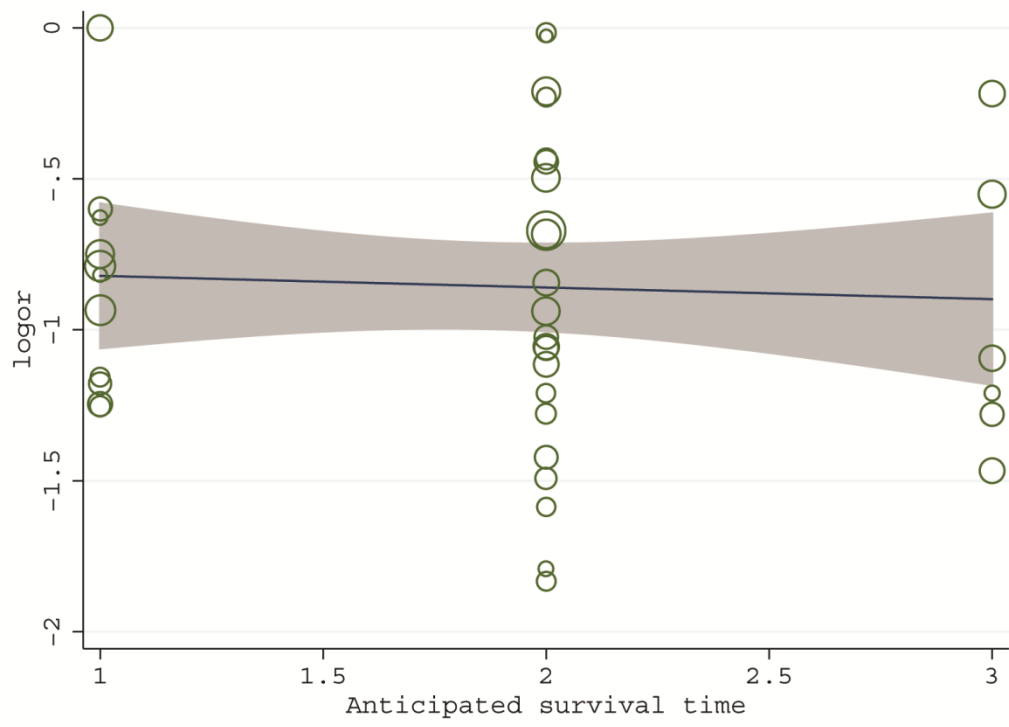

**Figure S48 Meta-regression of neutropenia by anticipated survival time**

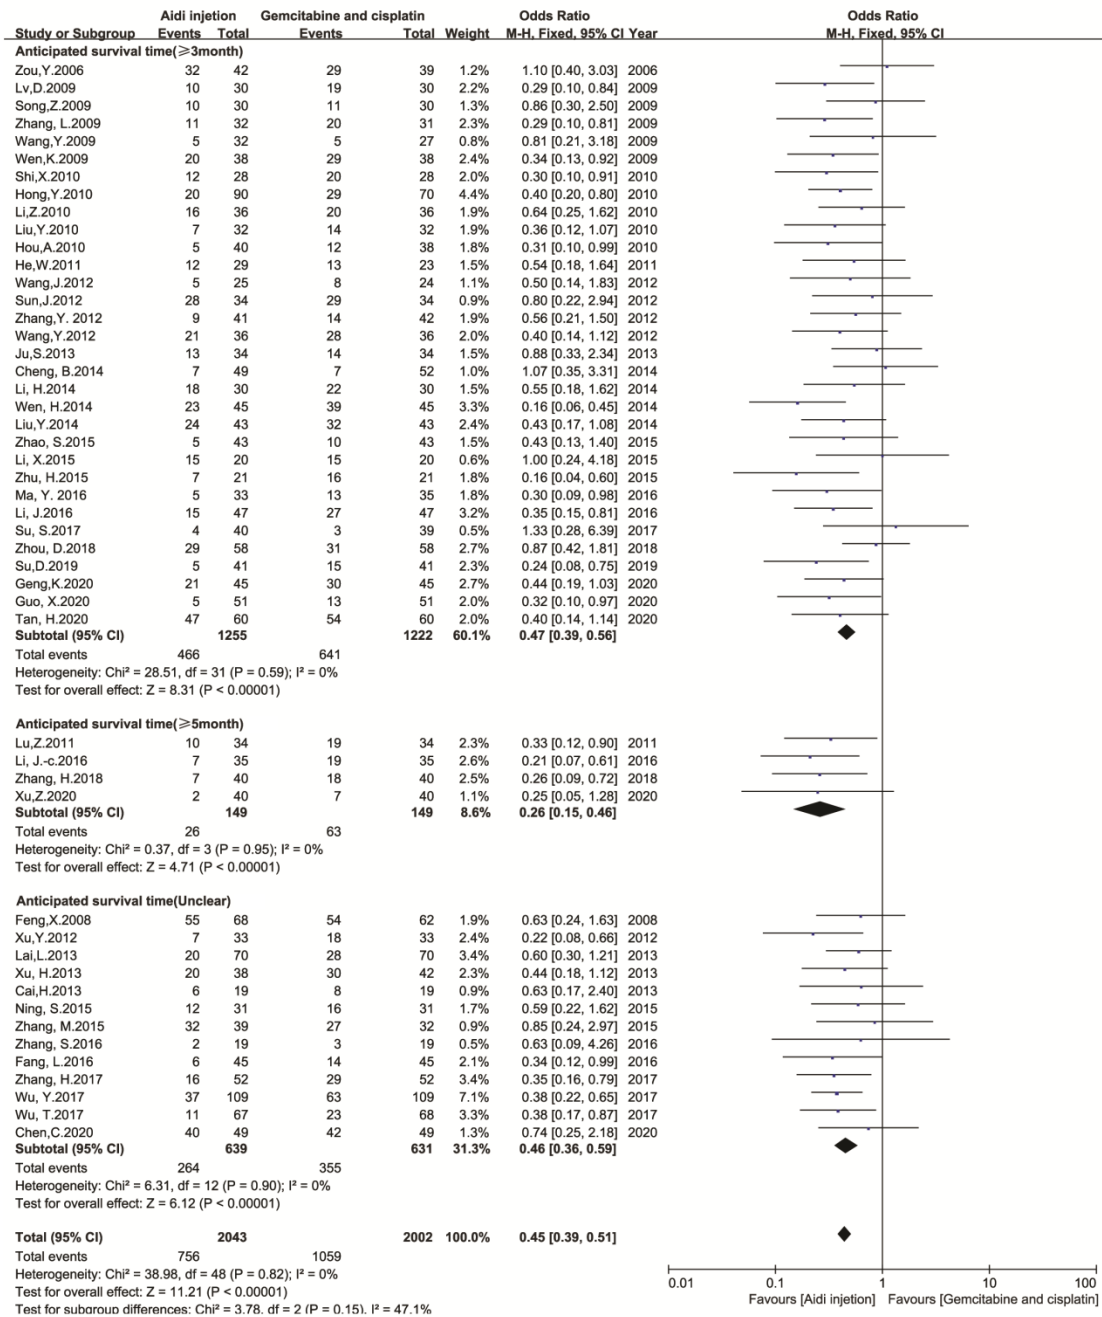

Figure S49 Subgroups analysis of gastrointestinal reaction by anticipated survival time

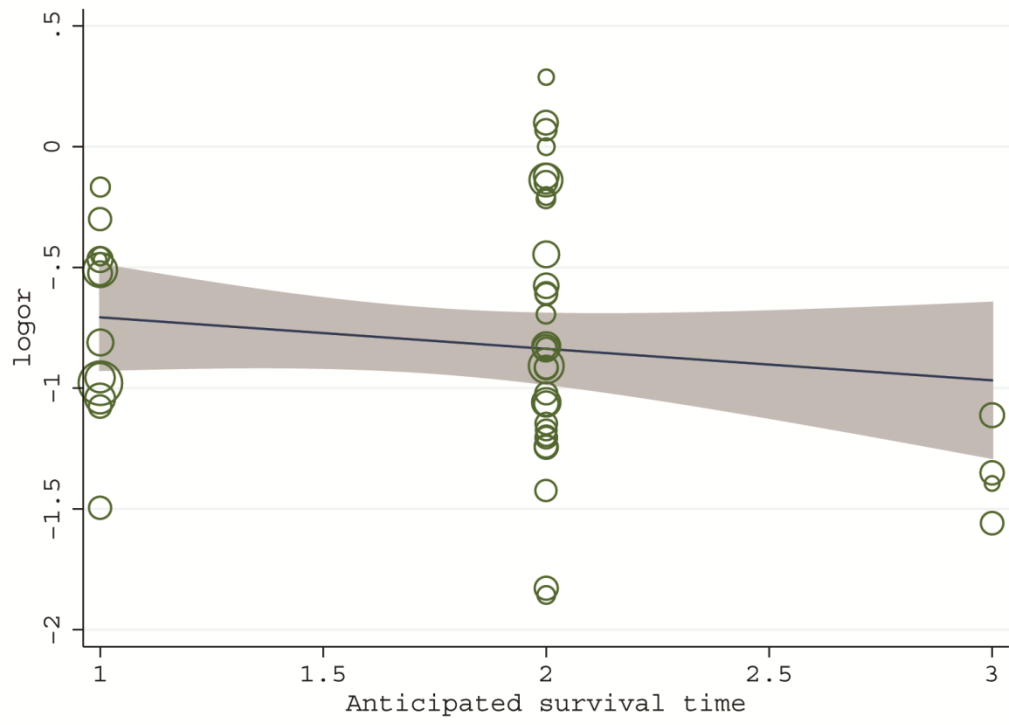

**Figure S50** Meta-regression of gastrointestinal reaction by anticipated survival time



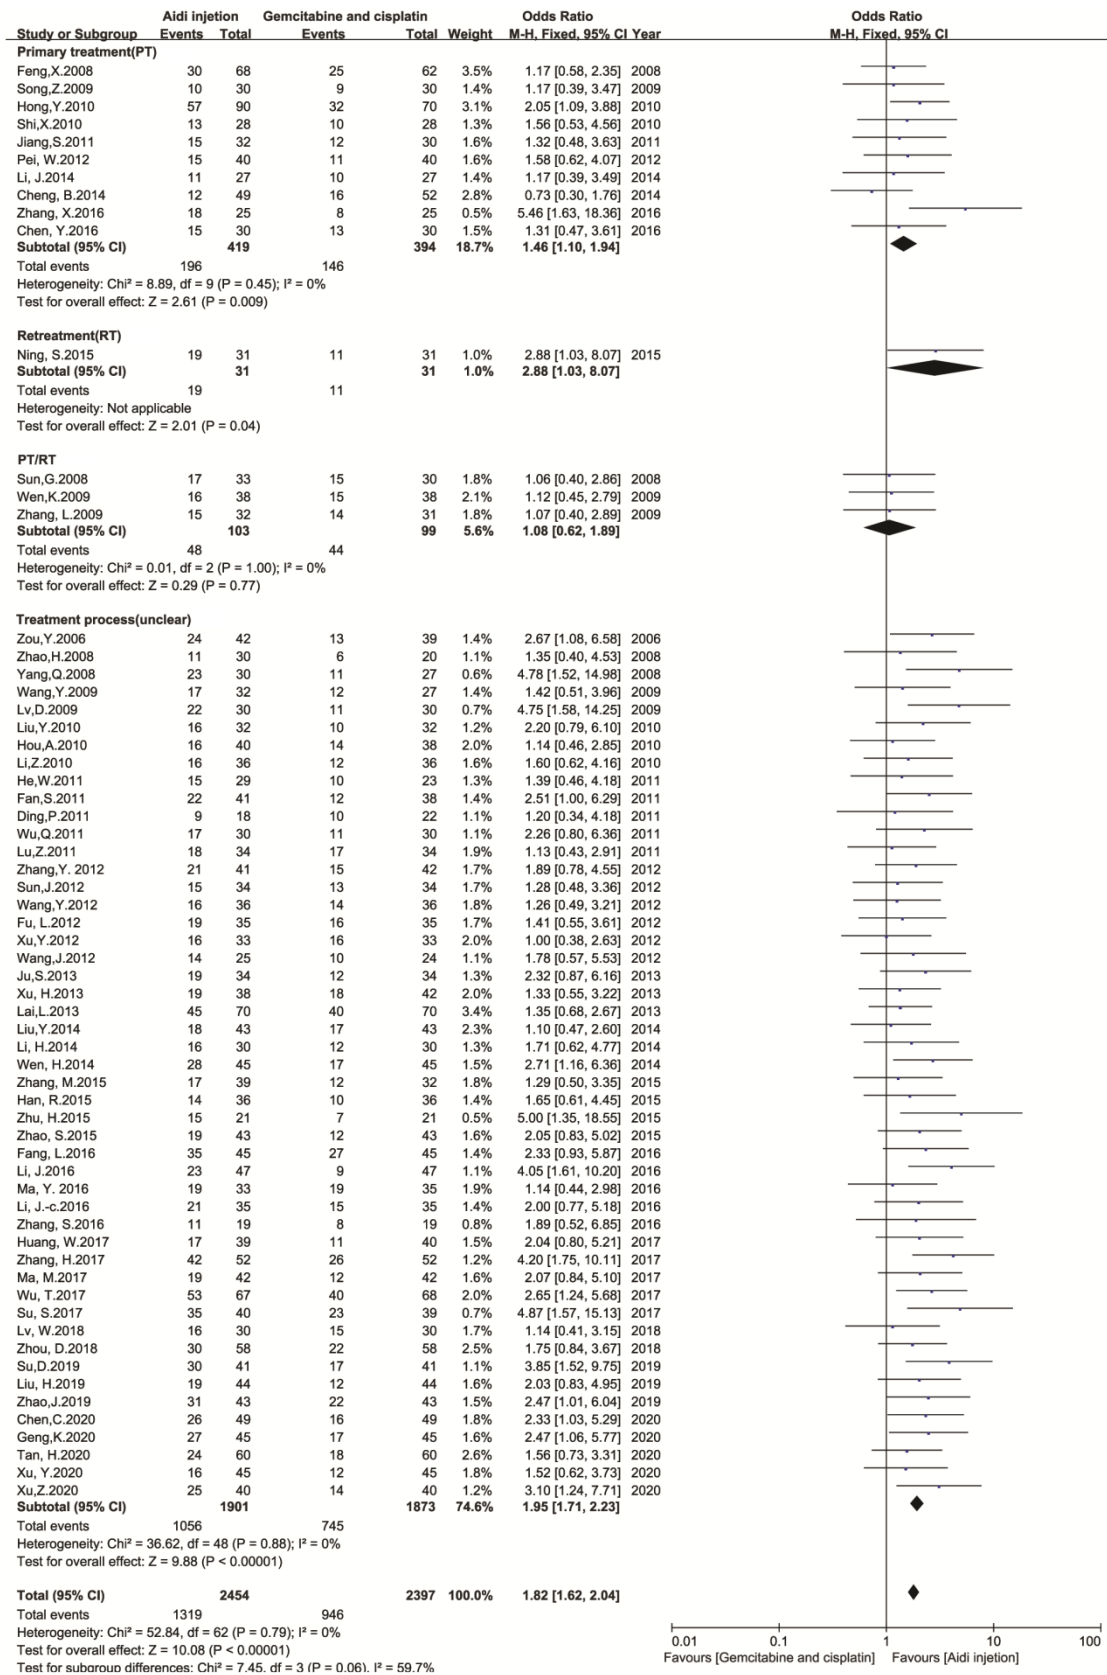

Figure S51 Subgroups analysis of objective response rate by treatment process

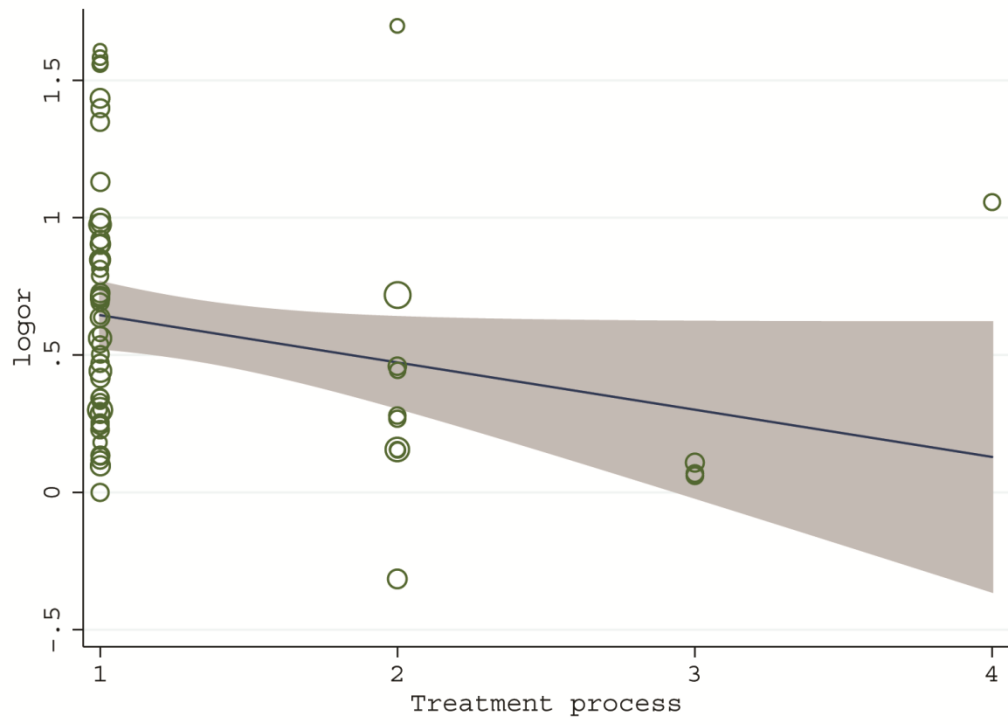

**Figure S52 Meta-regression of objective response rate by treatment process**

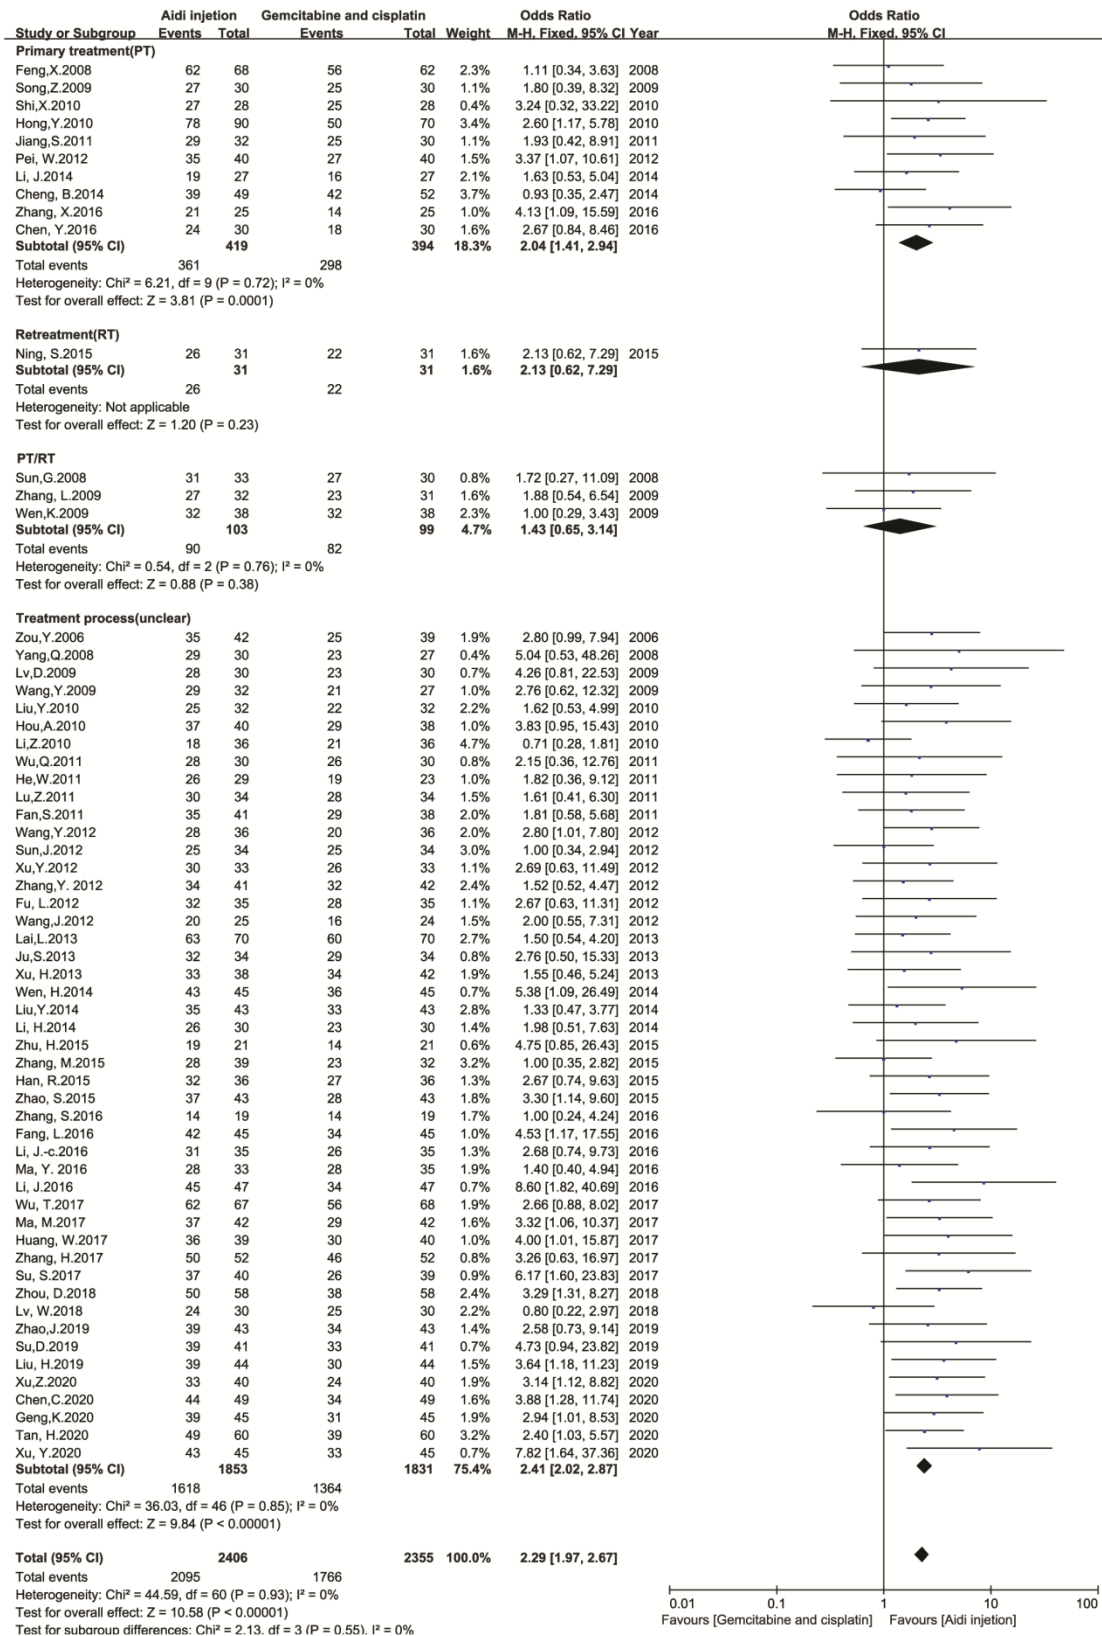

Figure S53 Subgroups analysis of disease control rate by treatment process

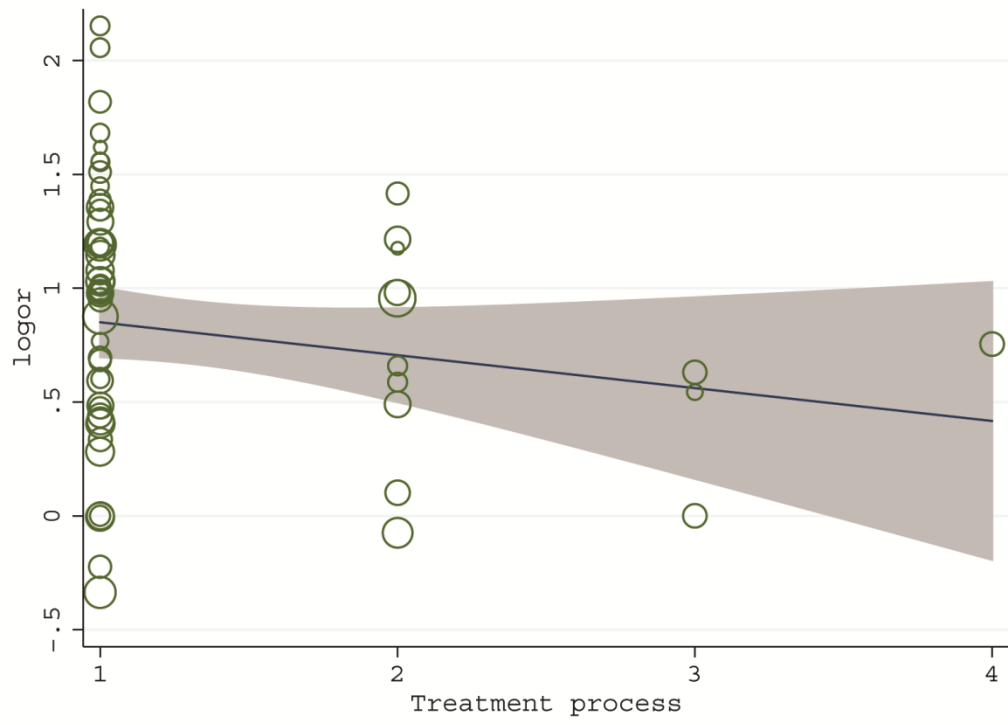

**Figure S54** Meta-regression of disease control rate by treatment process

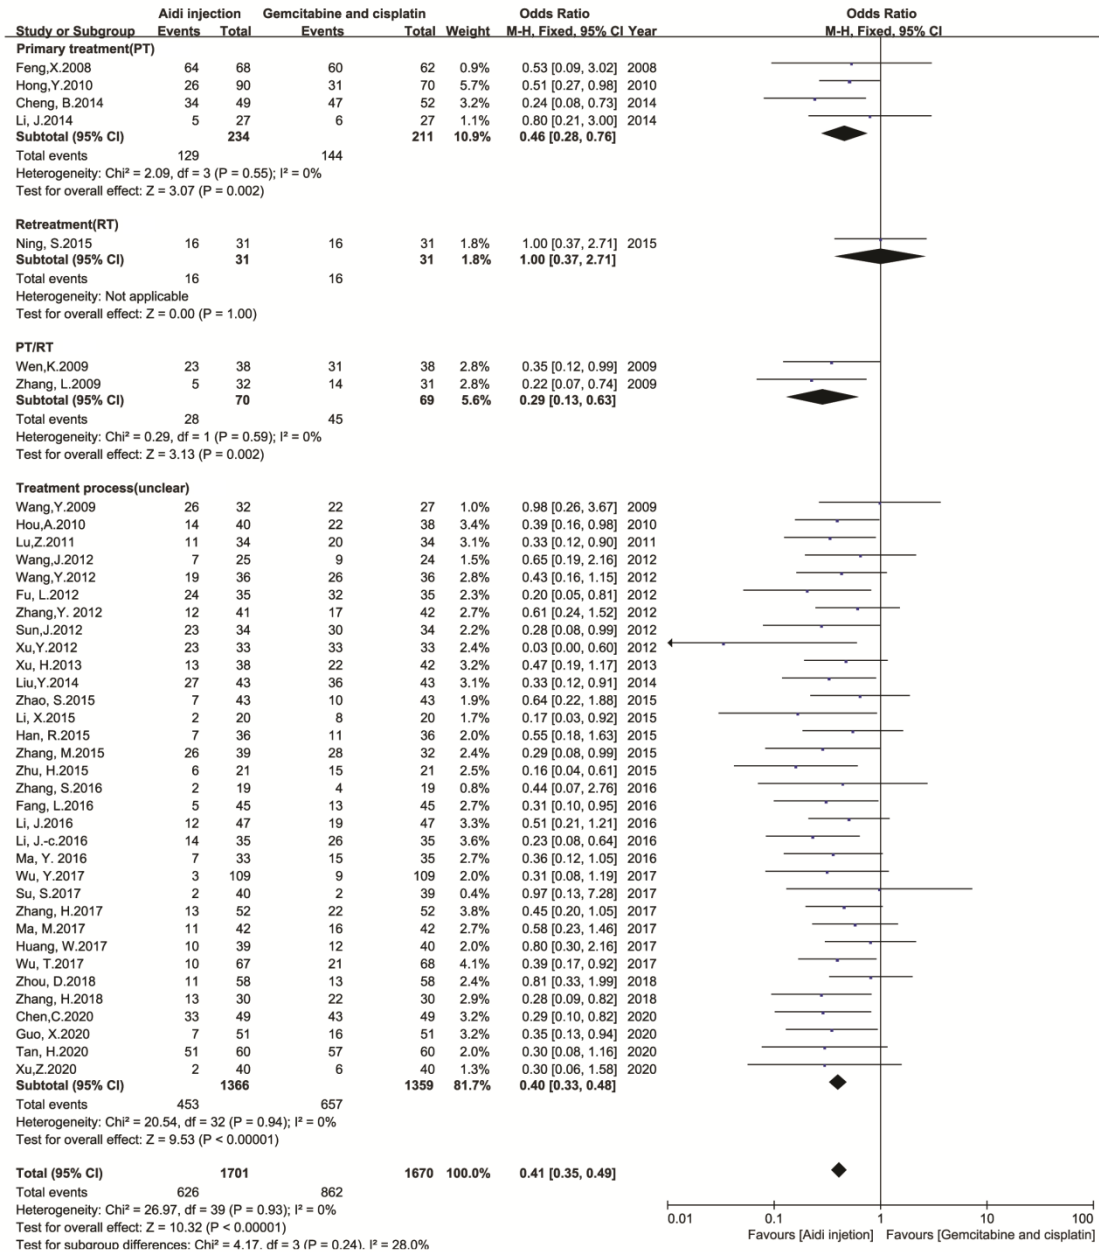

Figure S55 Subgroups analysis of neutropenia by treatment process

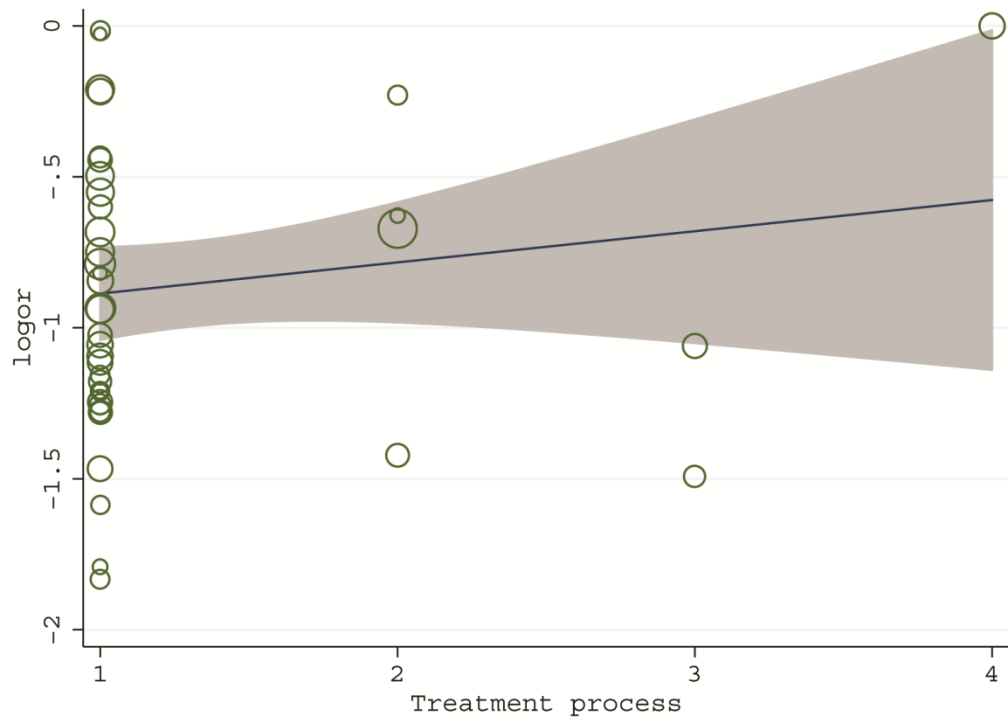

**Figure S56 Meta-regression of neutropenia by treatment process**

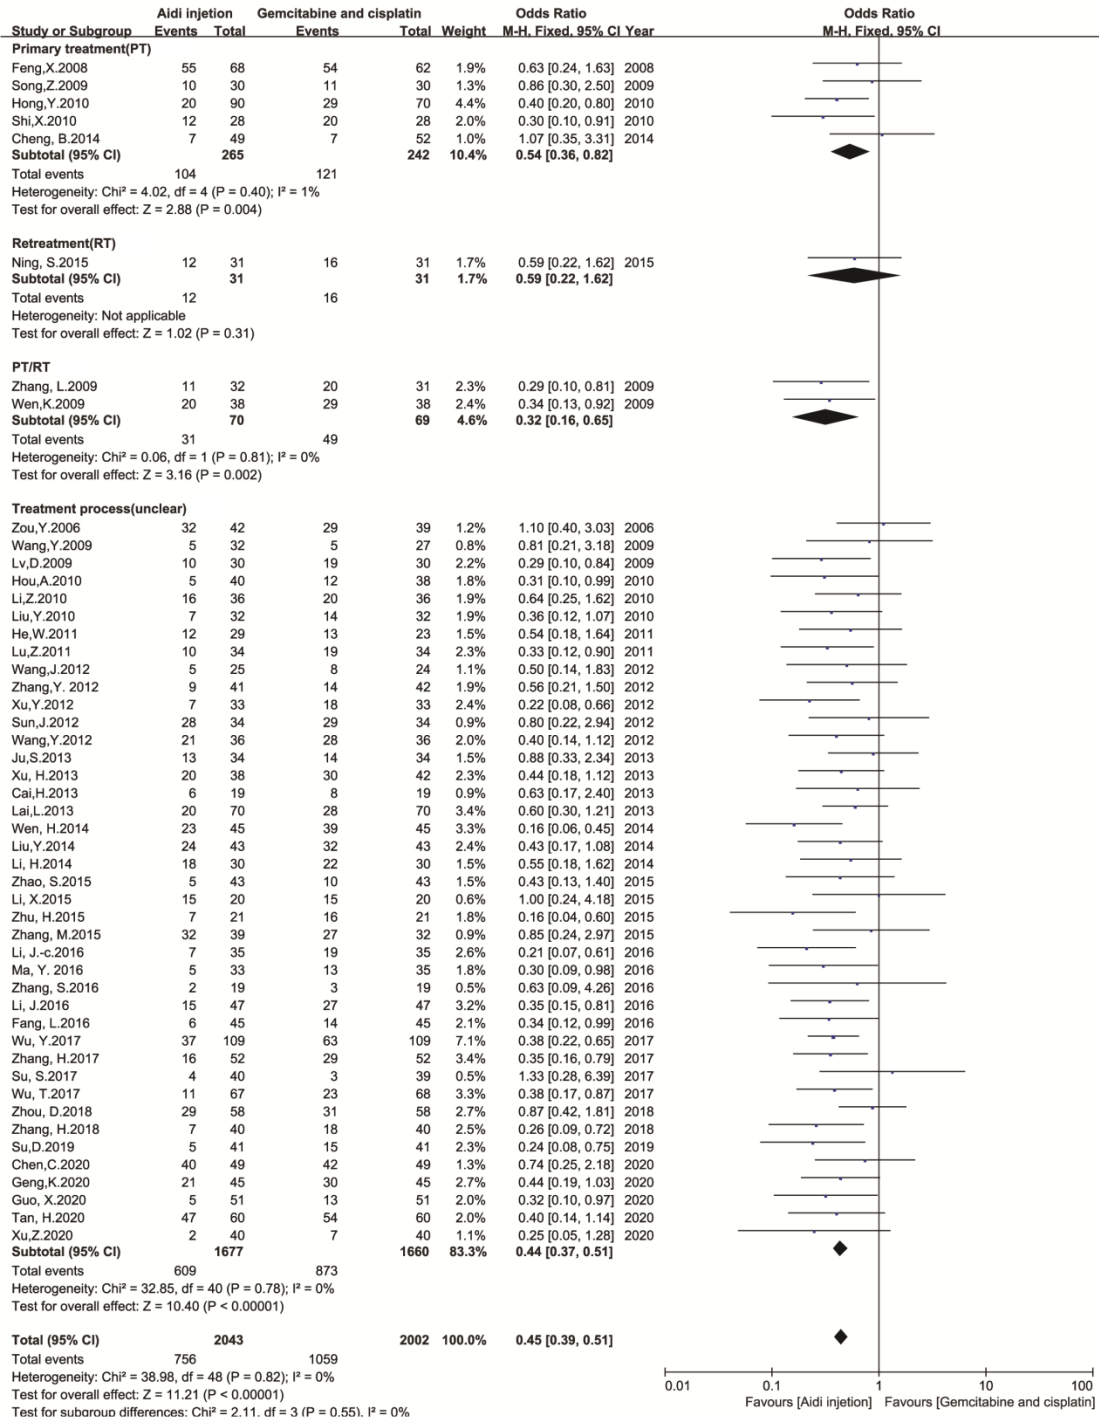

Figure S57 Subgroups analysis of gastrointestinal reaction by treatment process

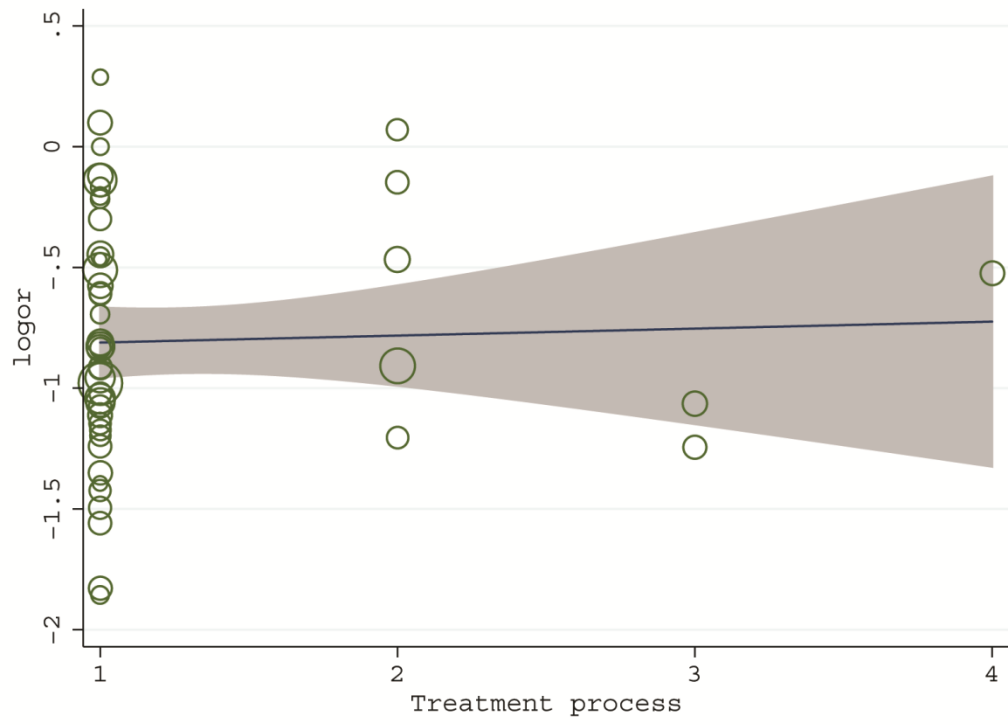

**Figure S58 Meta-regression of gastrointestinal reaction by treatment process**



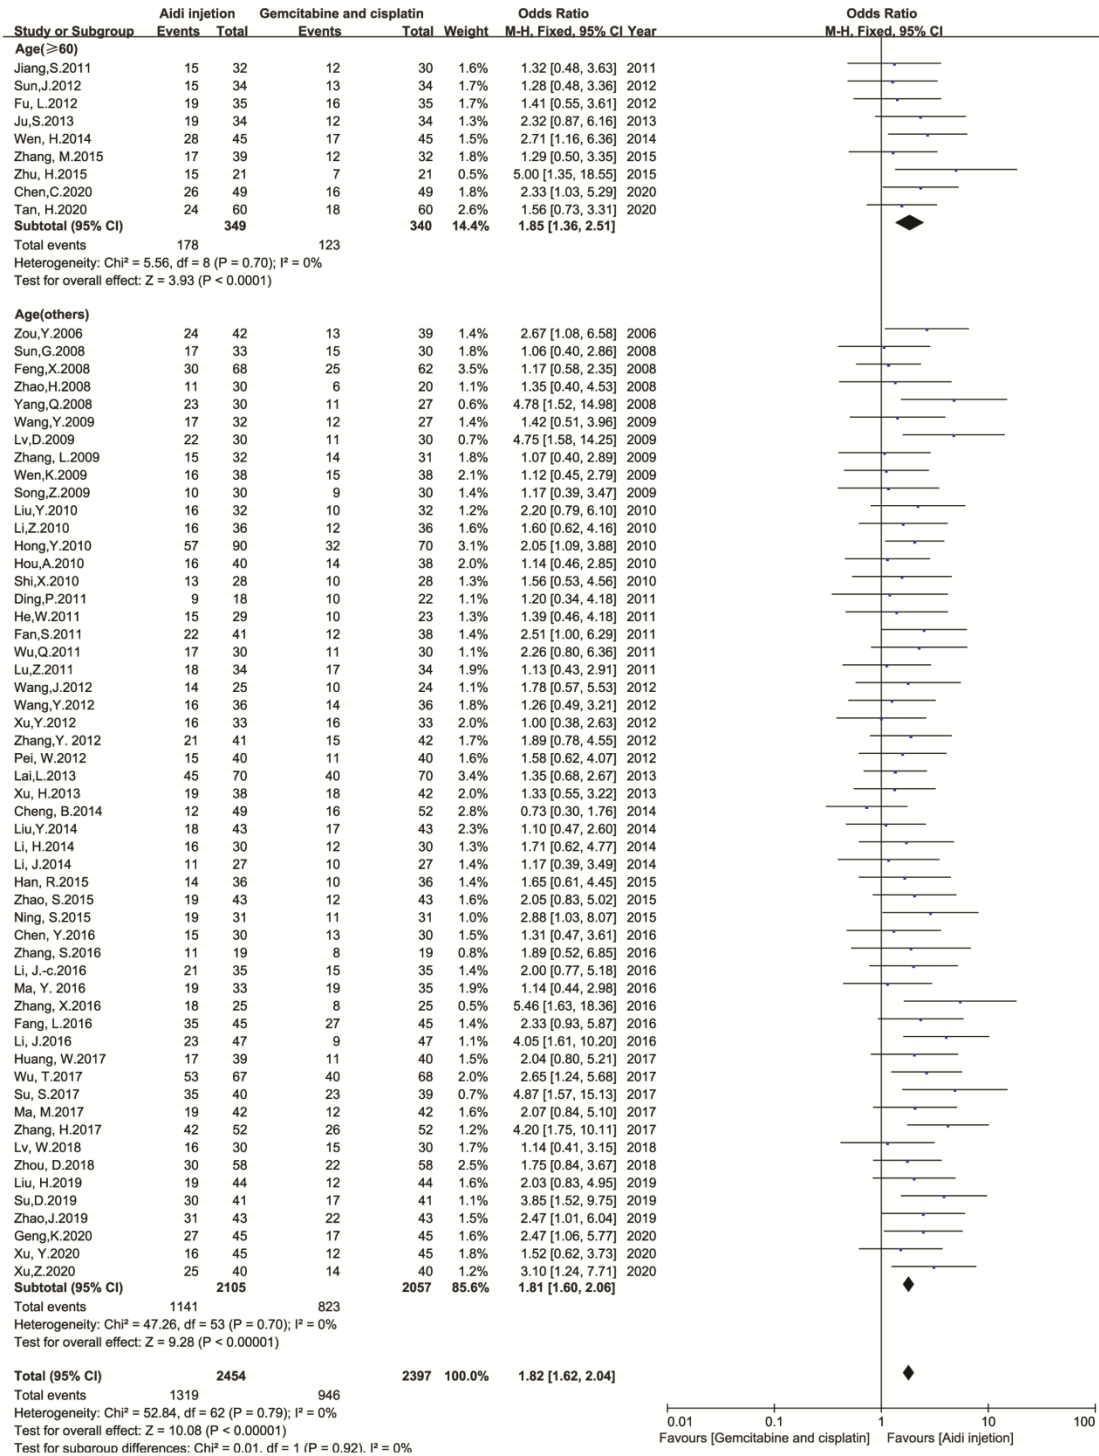

Figure S59 Subgroups analysis of objective response rate by age

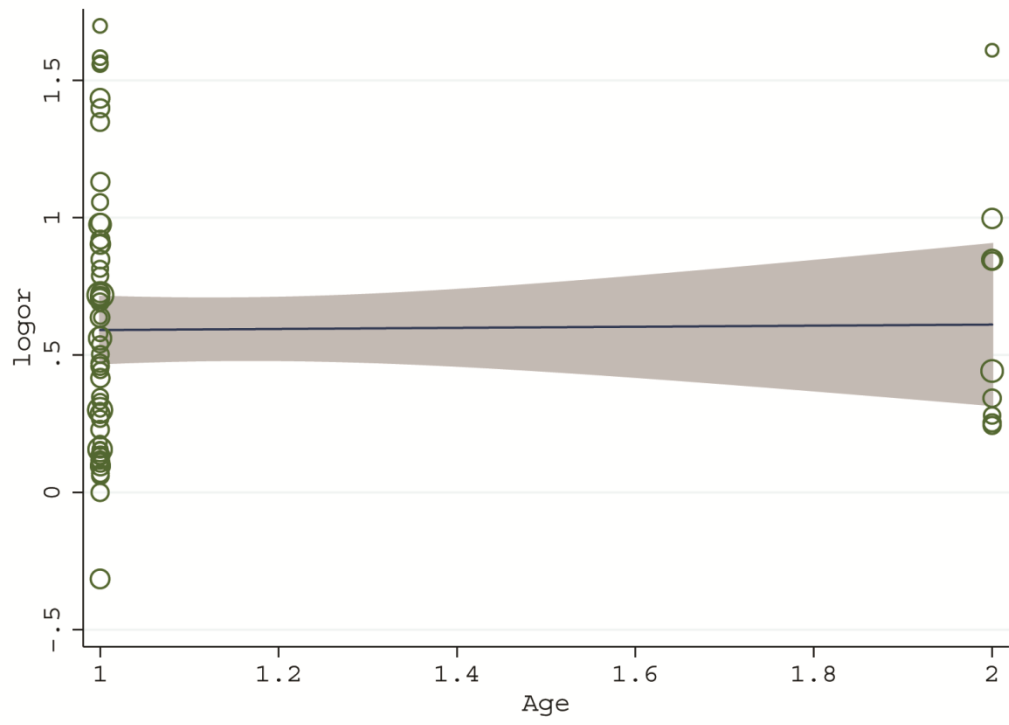

**Figure S60** Meta-regression of objective response rate by age

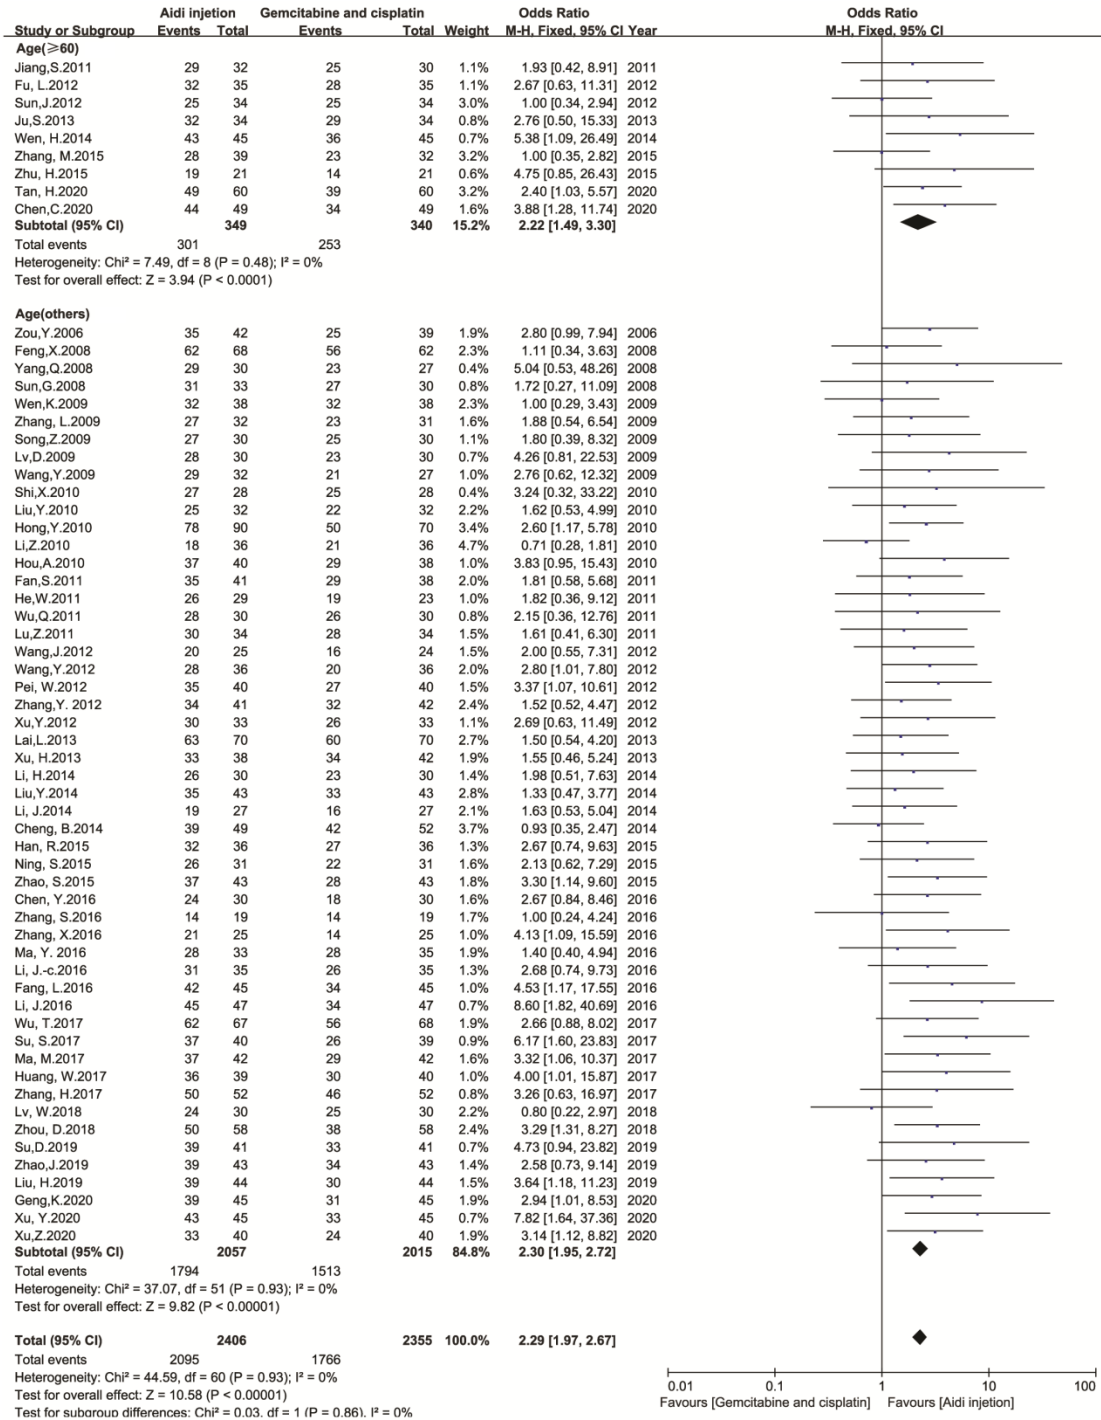

Figure S61 Subgroups analysis of disease control rate by age

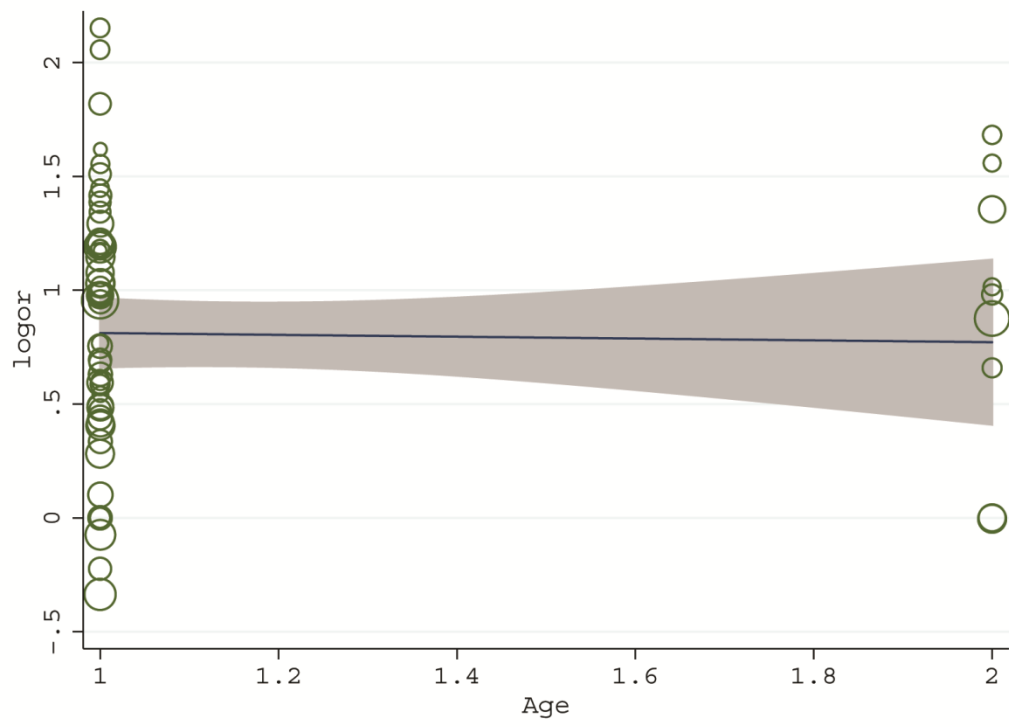

**Figure S62** Meta-regression of disease control rate by age

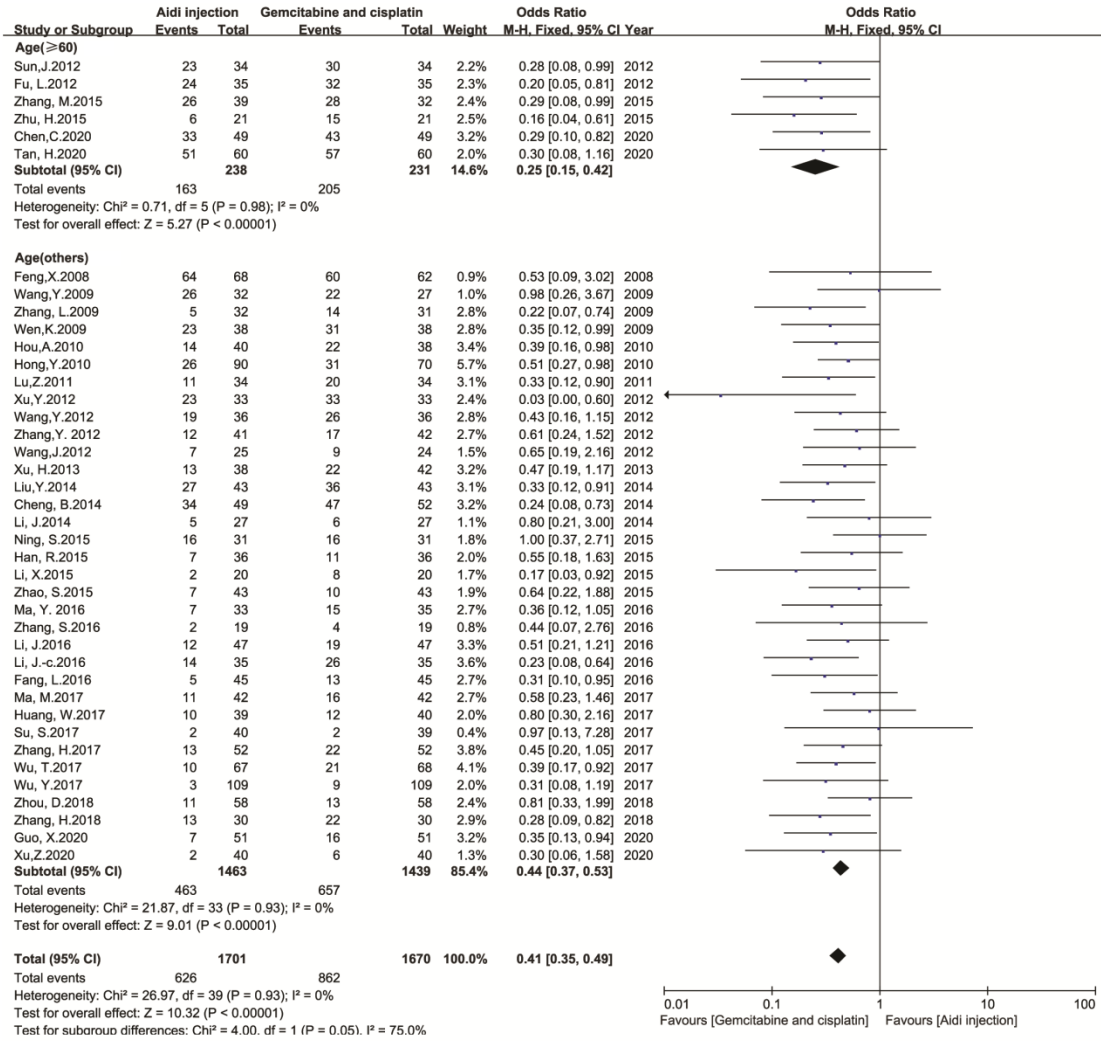

**Figure S63 Subgroups analysis of neutropenia by age**

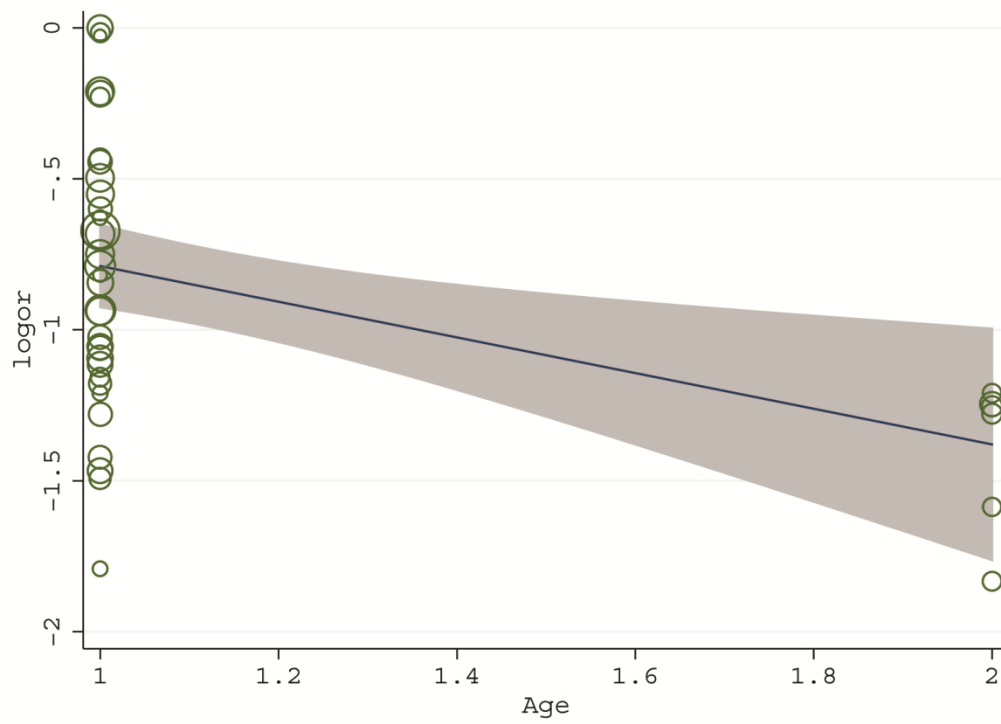

**Figure S64 Meta-regression of neutropenia by age**

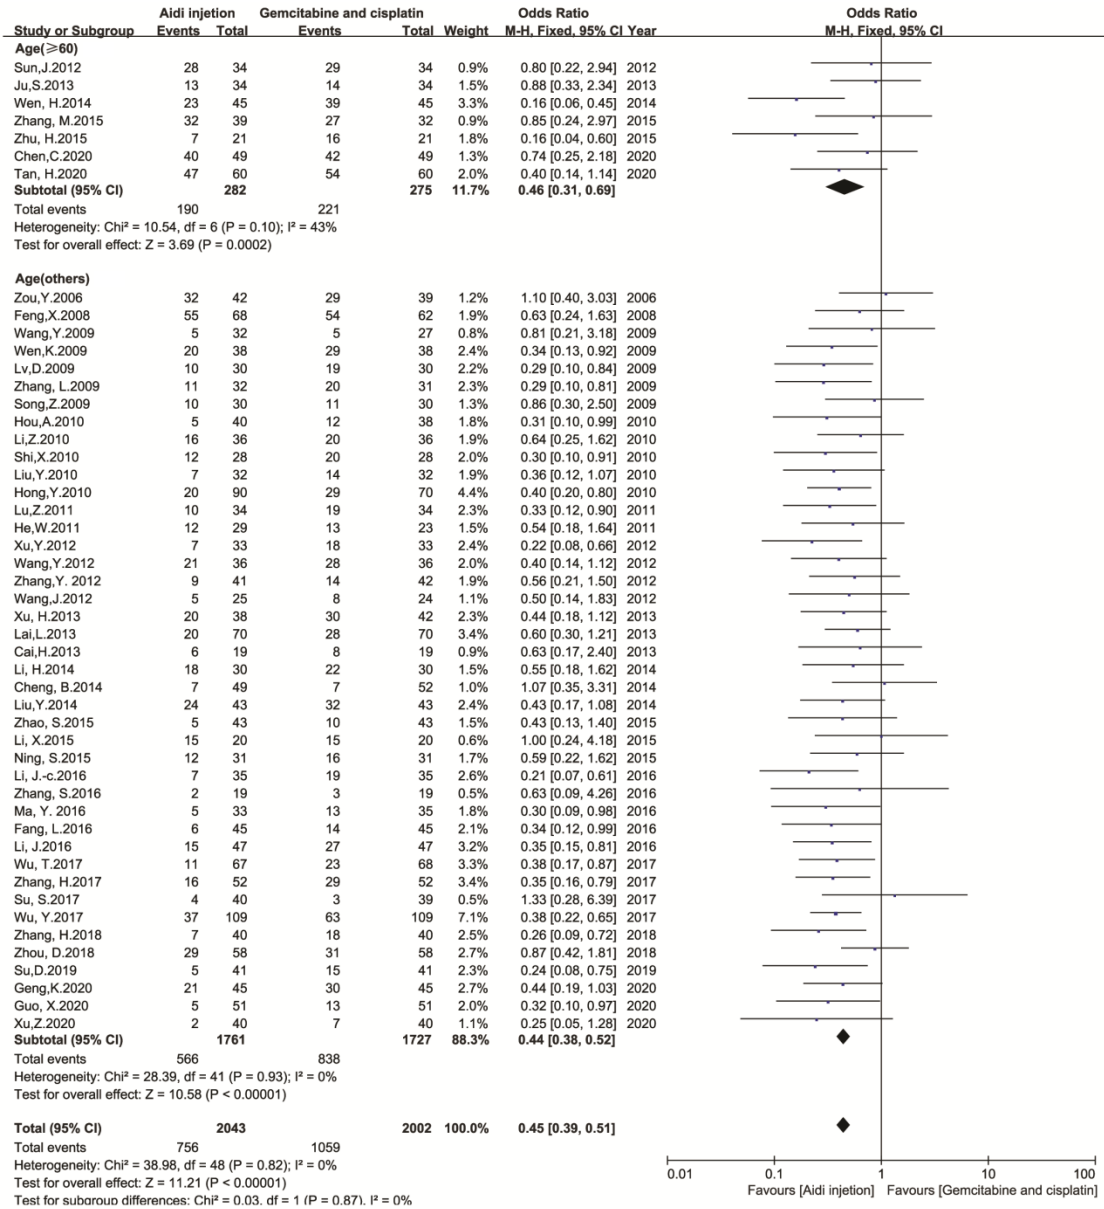

Figure S65 Subgroups analysis of gastrointestinal reaction by age

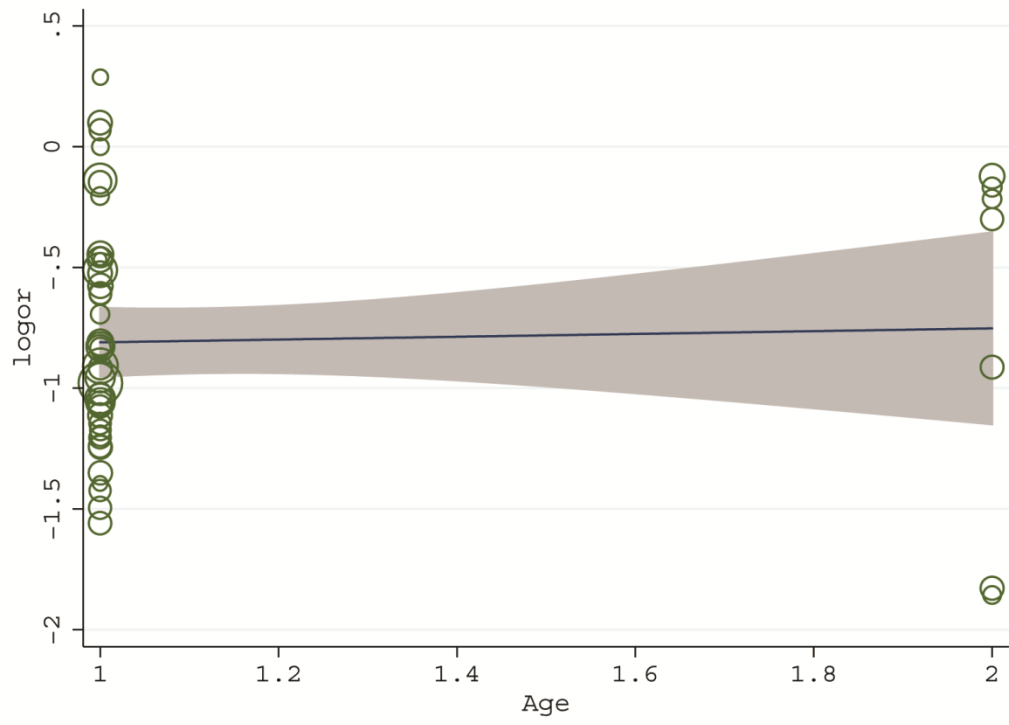

**Figure S66** Meta-regression of gastrointestinal reaction by age



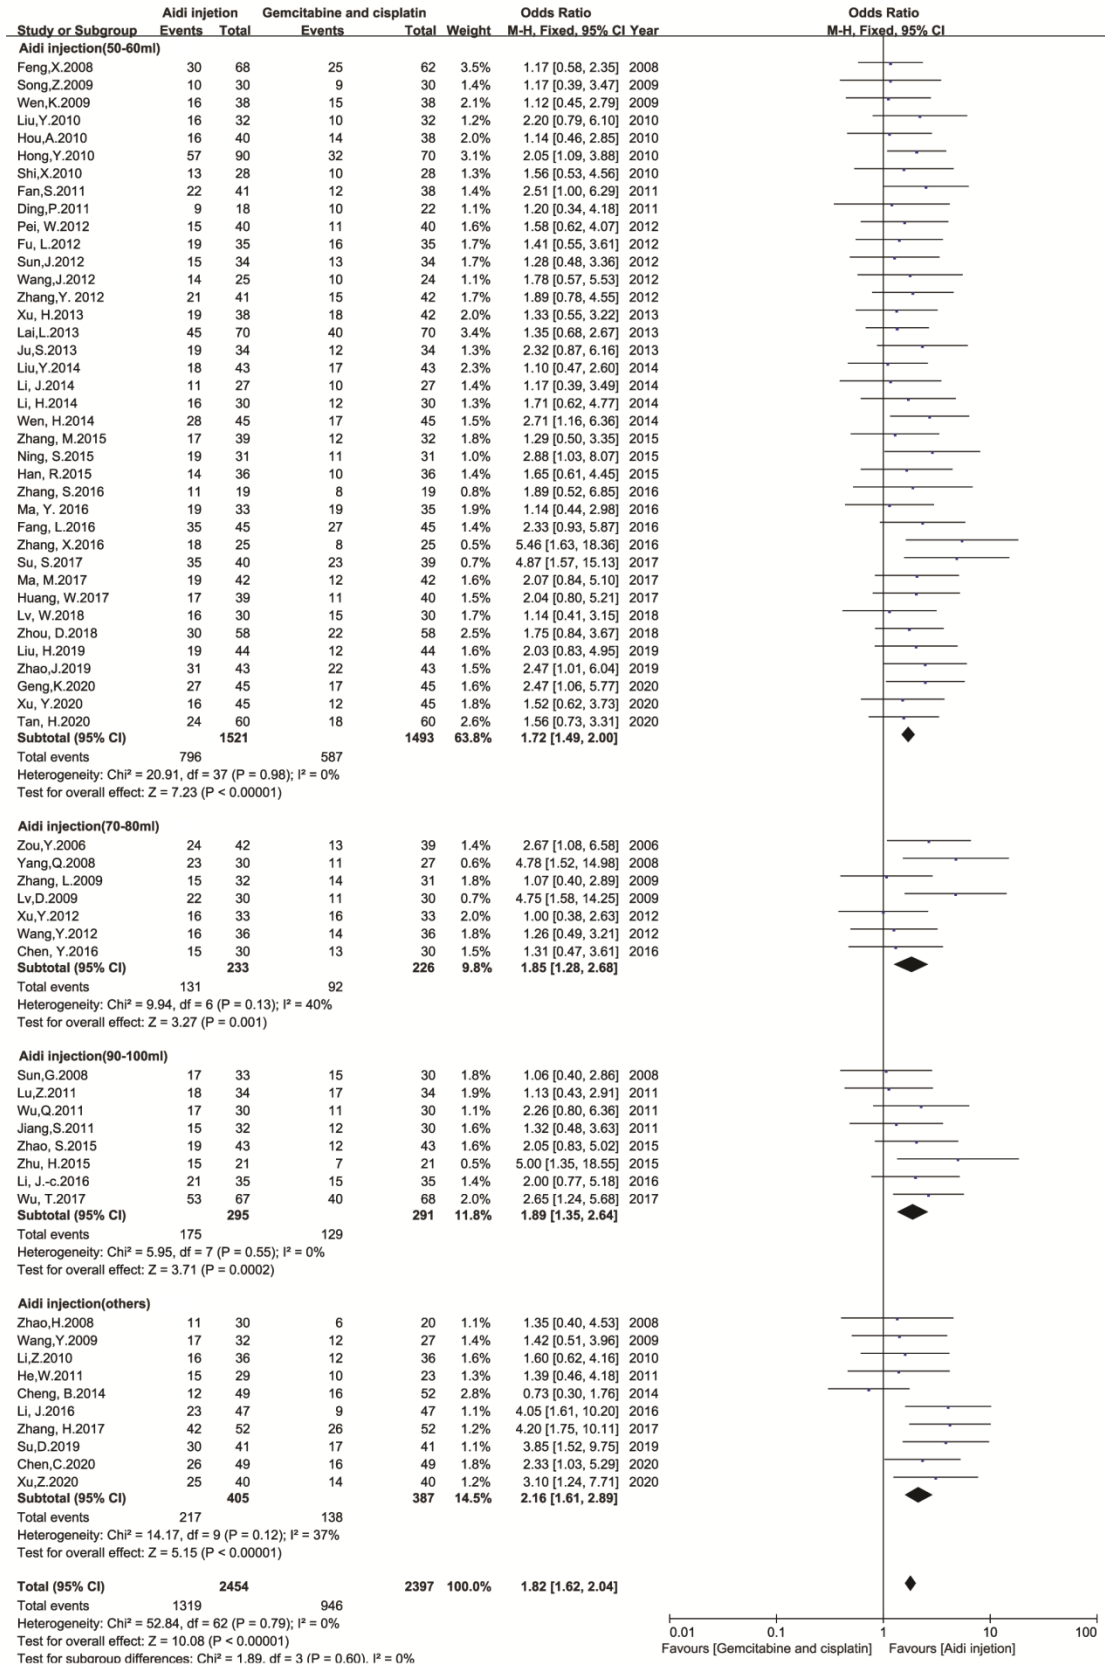

Figure S67 Subgroups analysis of objective response rate by dosage of Aidi injection

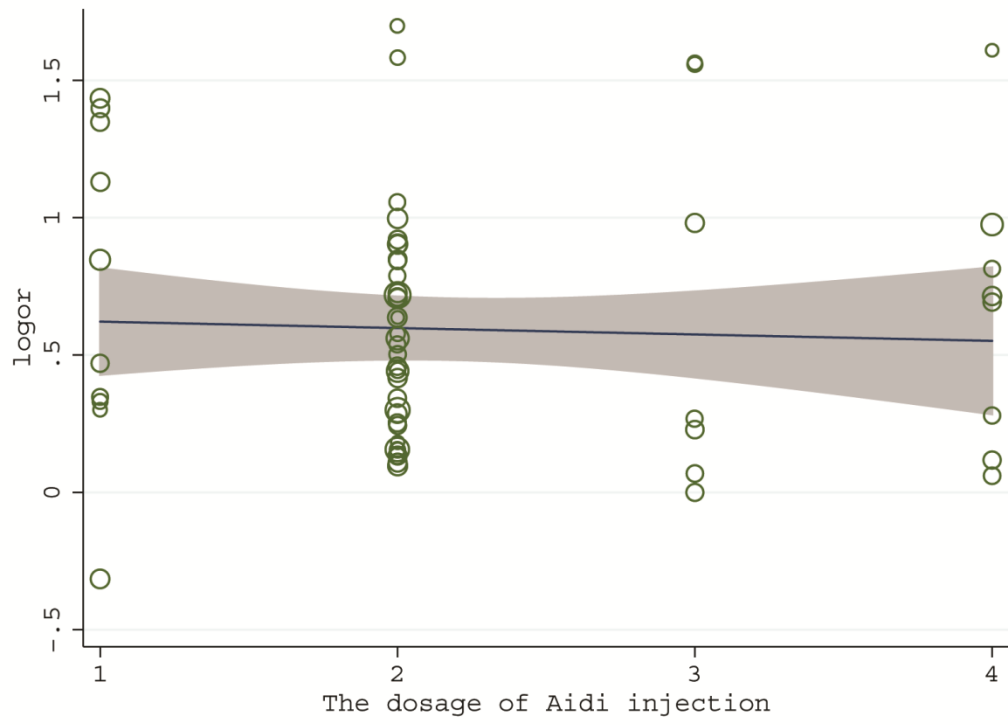

**Figure S68 Meta-regression of objective response rate by dosage of Aidi injection**

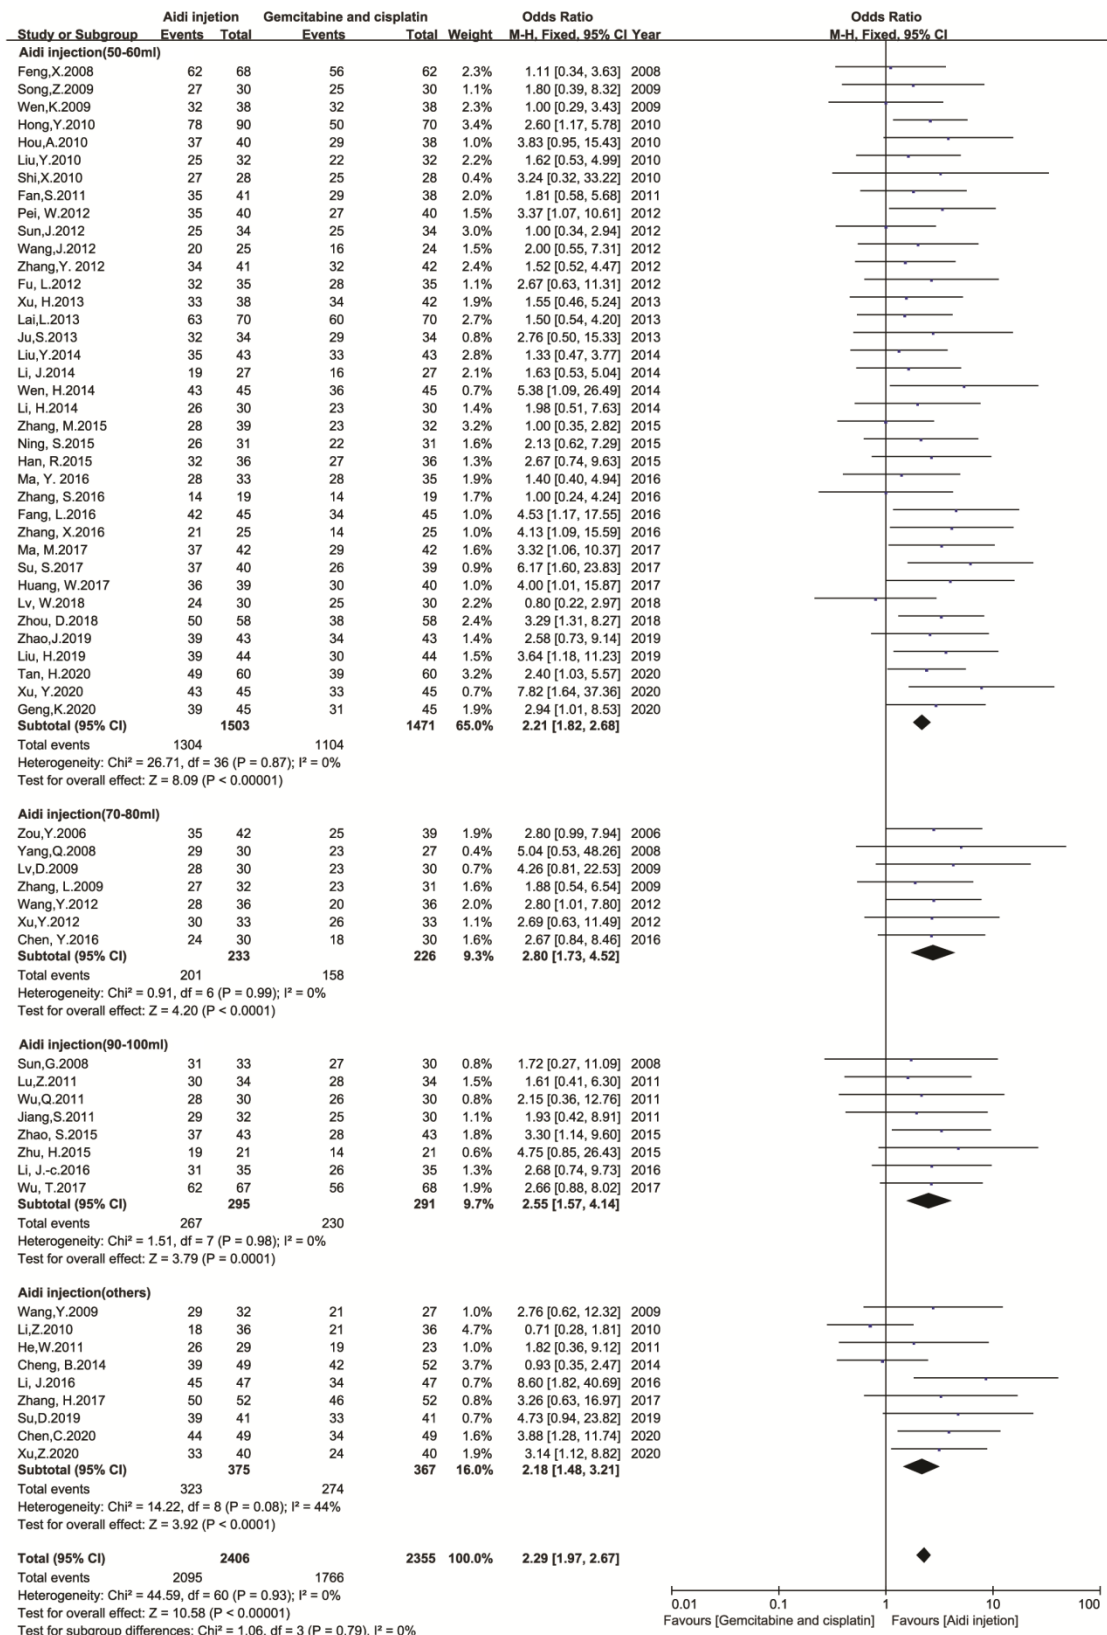

Figure S69 Subgroups analysis of disease control rate by dosage of Aidi injection

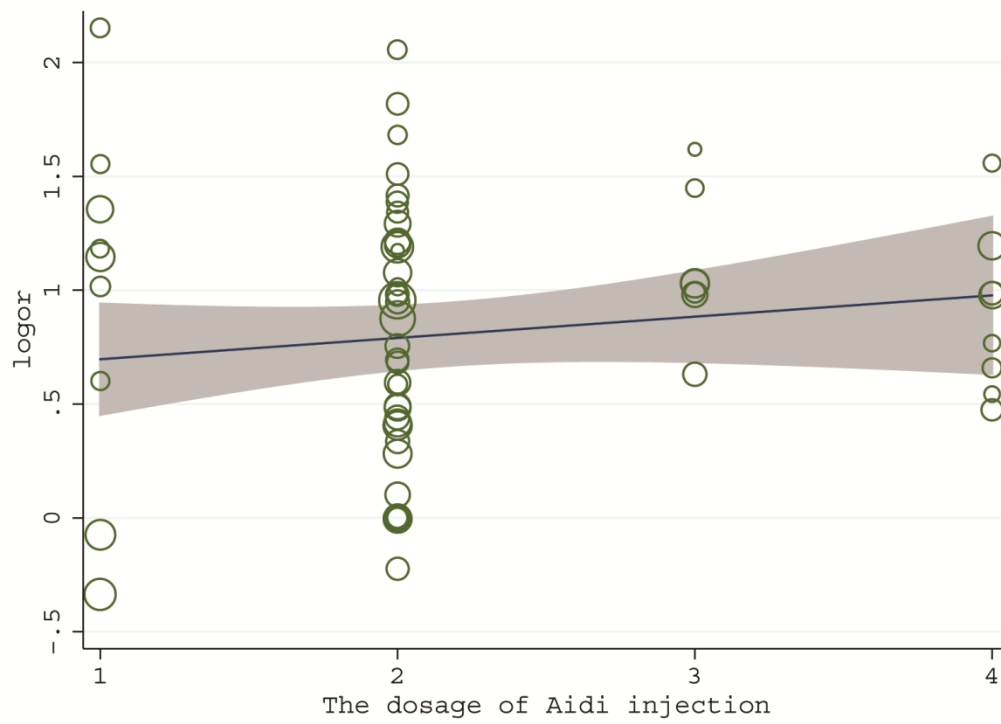

**Figure S70** Meta-regression of disease control rate by dosage of Aidi injection

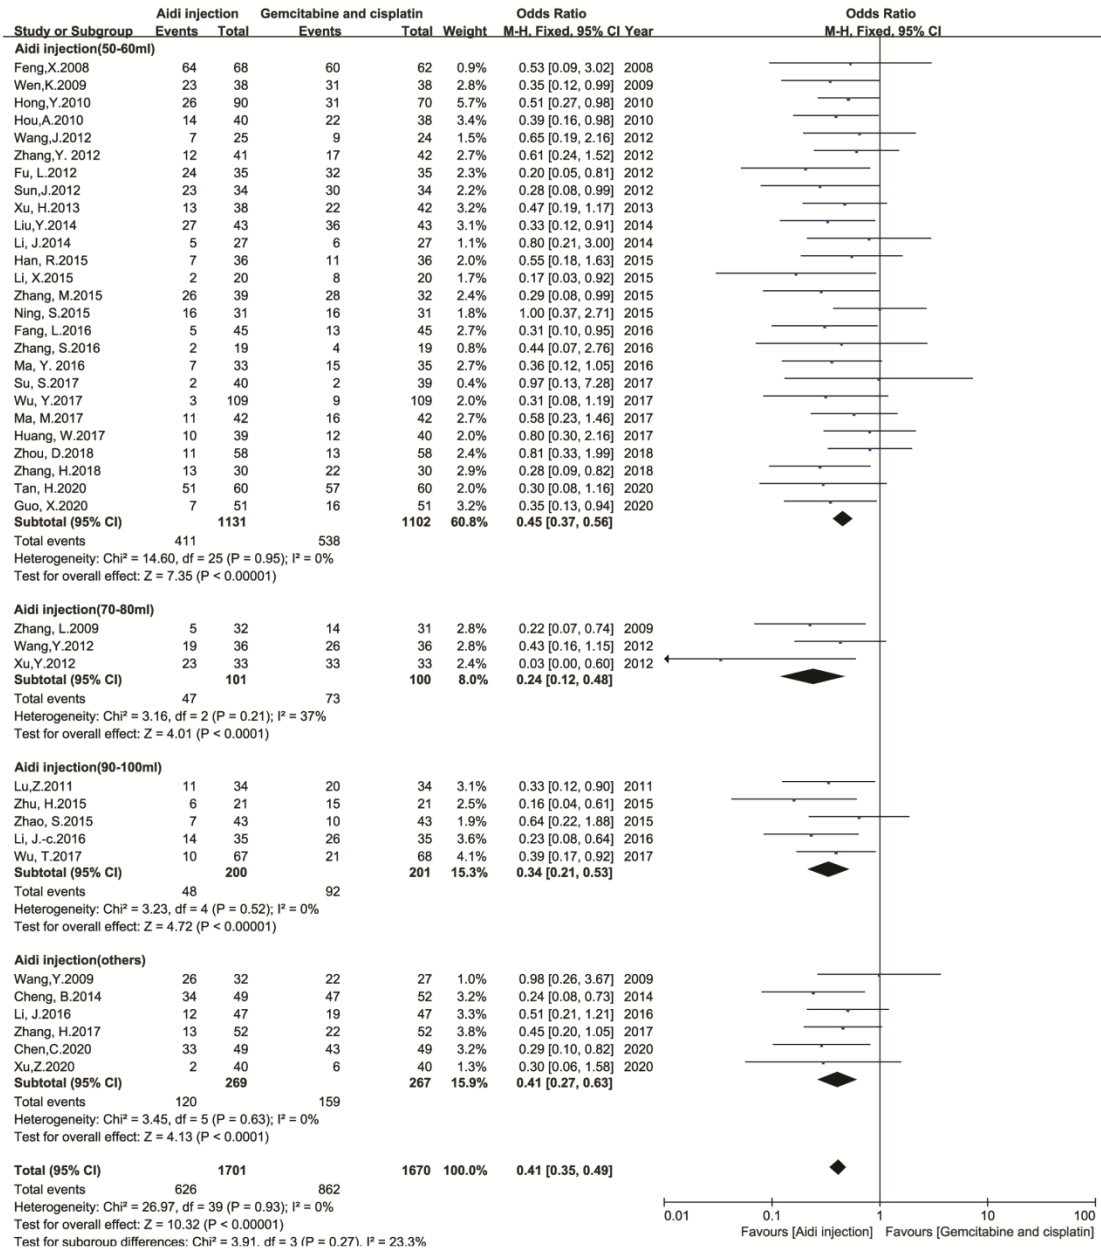

Figure S71 Subgroups analysis of neutropenia by dosage of Aidi injection

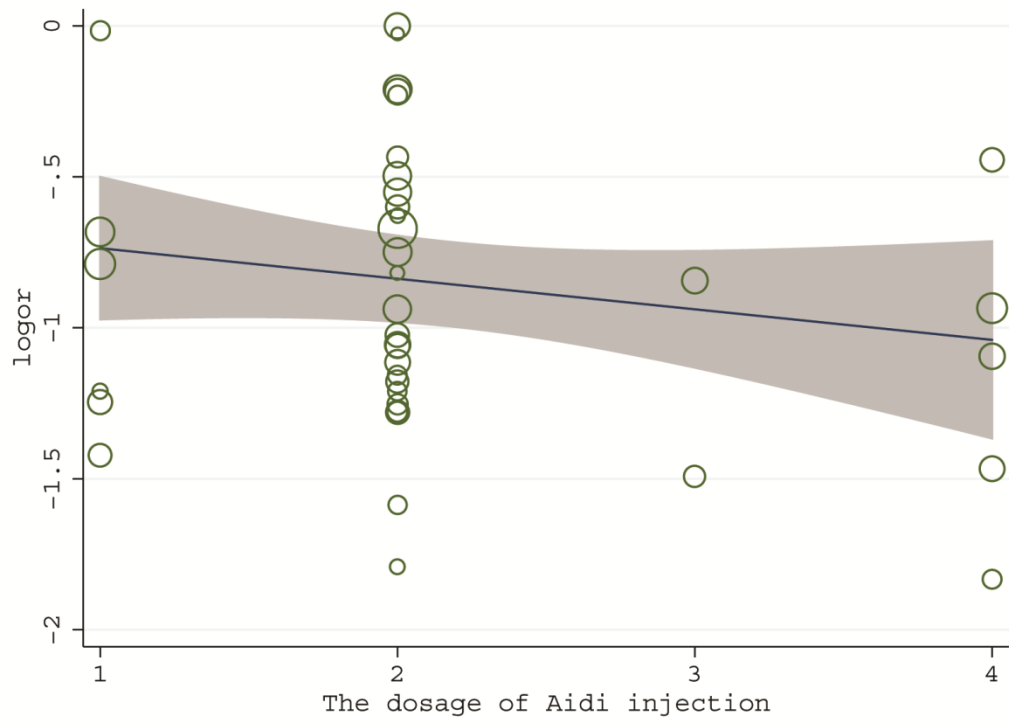

**Figure S72 Meta-regression of neutropenia by dosage of Aidi injection**

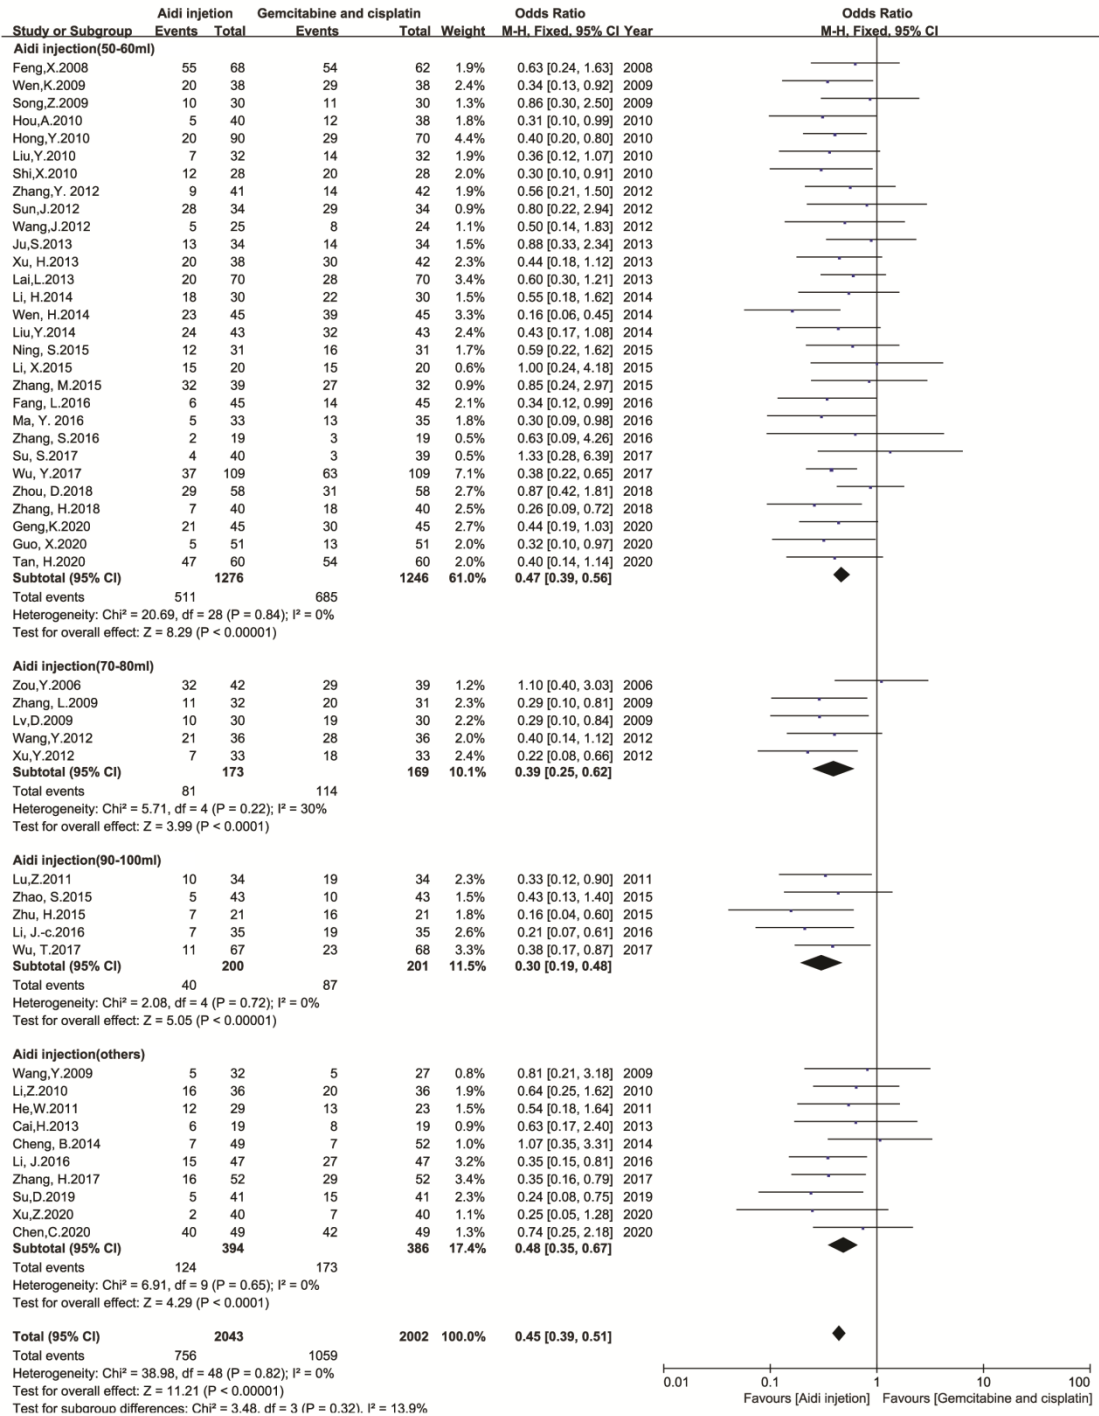

Figure S73 Subgroups analysis of gastrointestinal reaction by dosage of Aidi injection

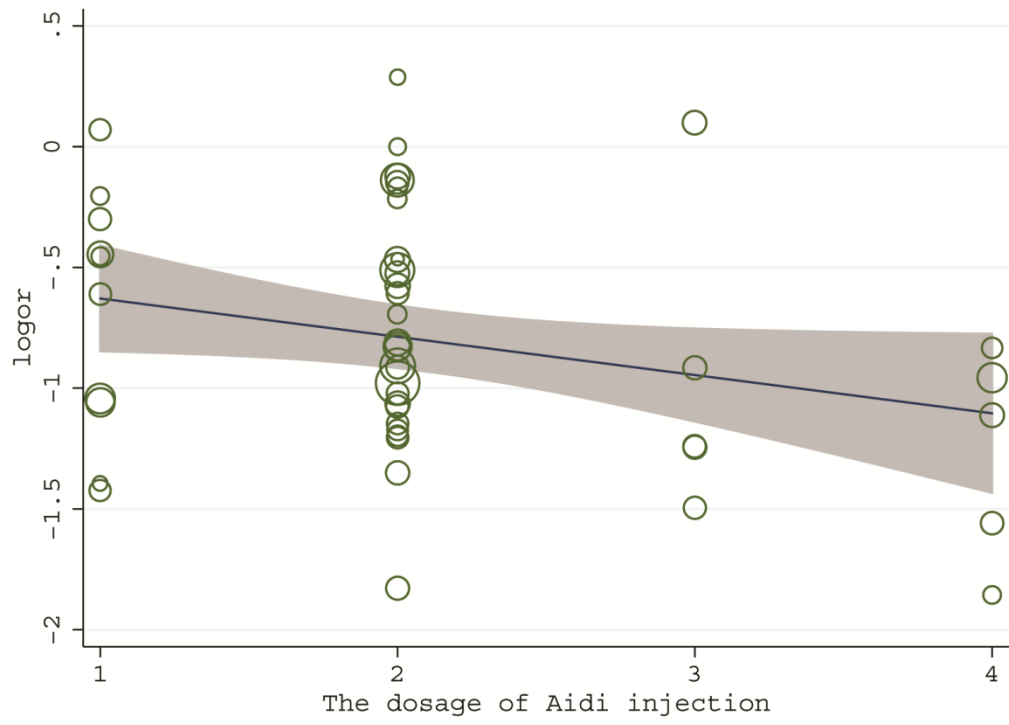

**Figure S74 Meta-regression of gastrointestinal reaction by dosage of Aidi injection**



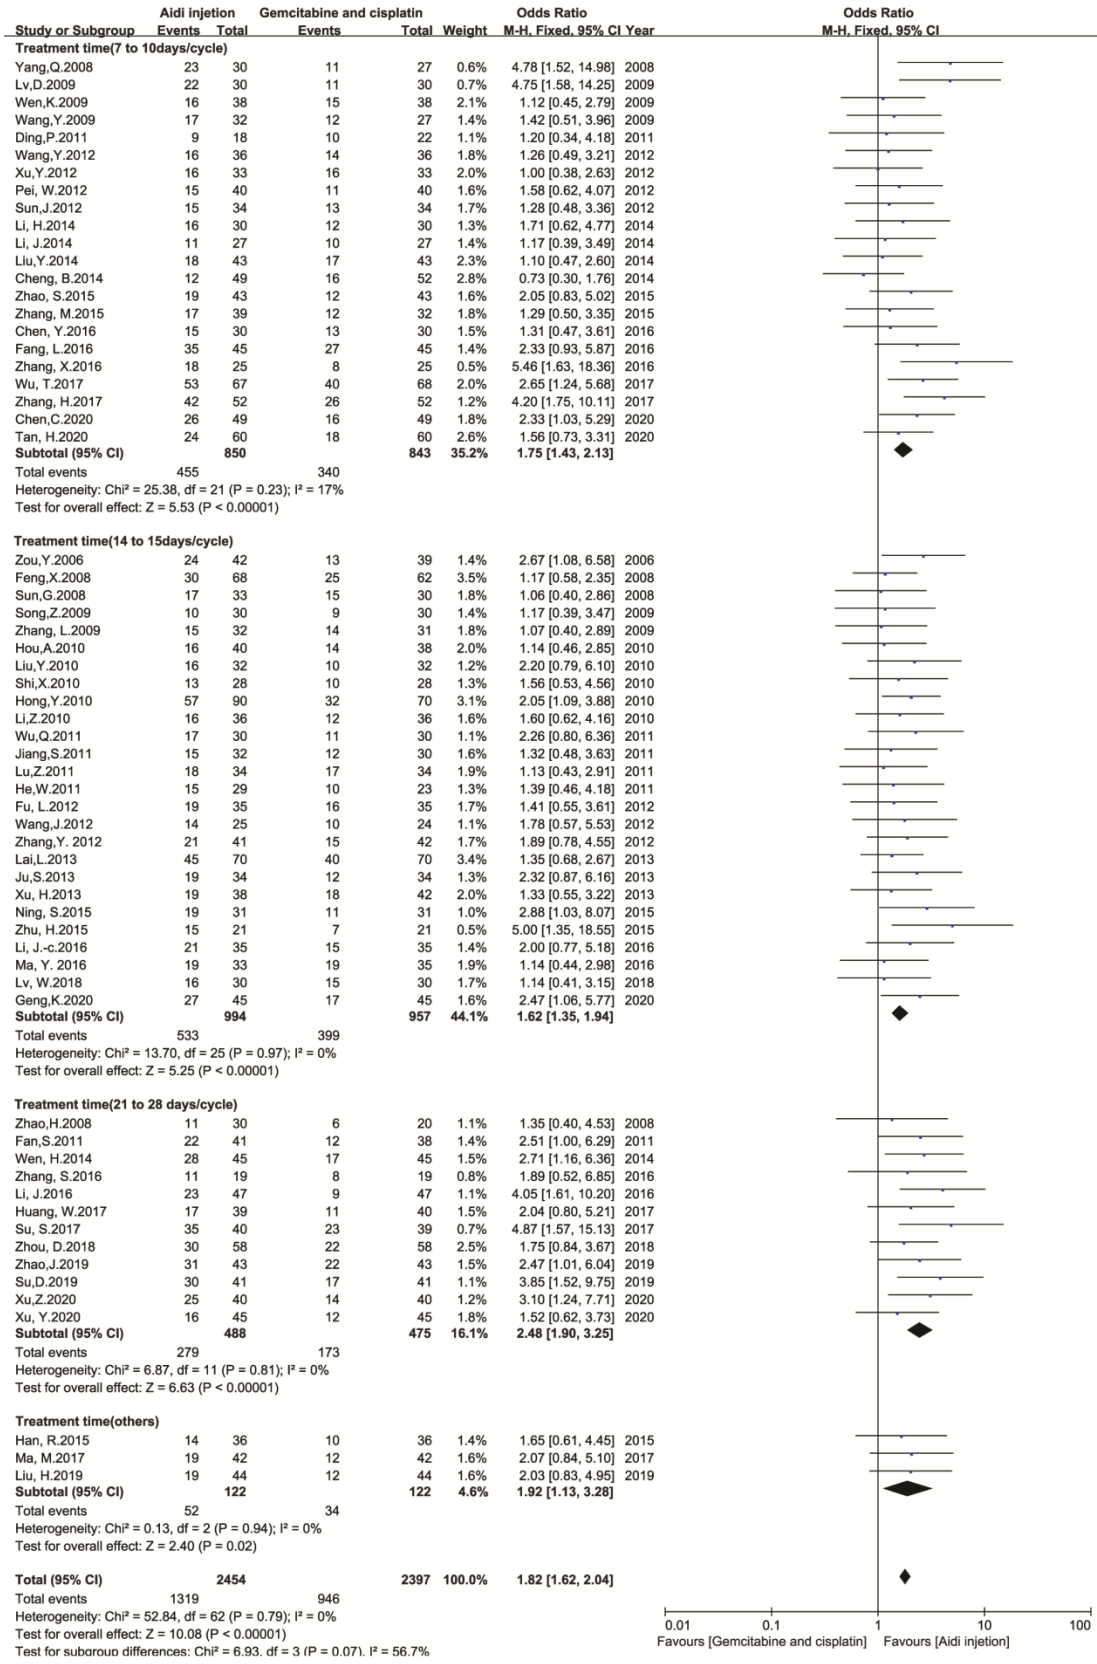

Figure S75 Subgroups analysis of objective response rate by treatment time

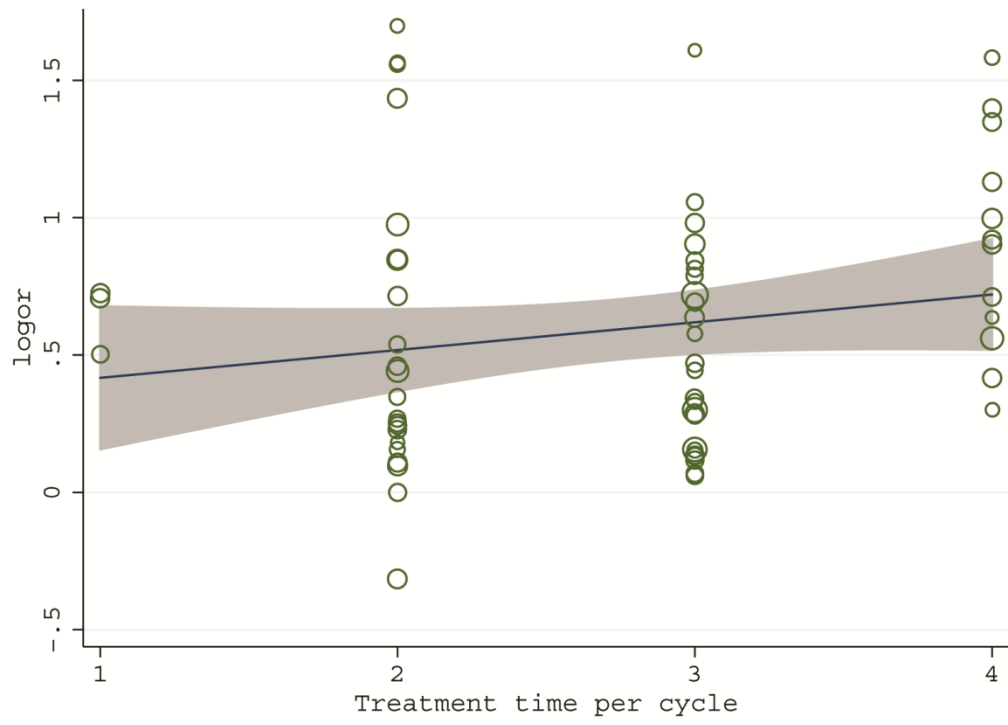

**Figure S76 Meta-regression of objective response rate by treatment time**

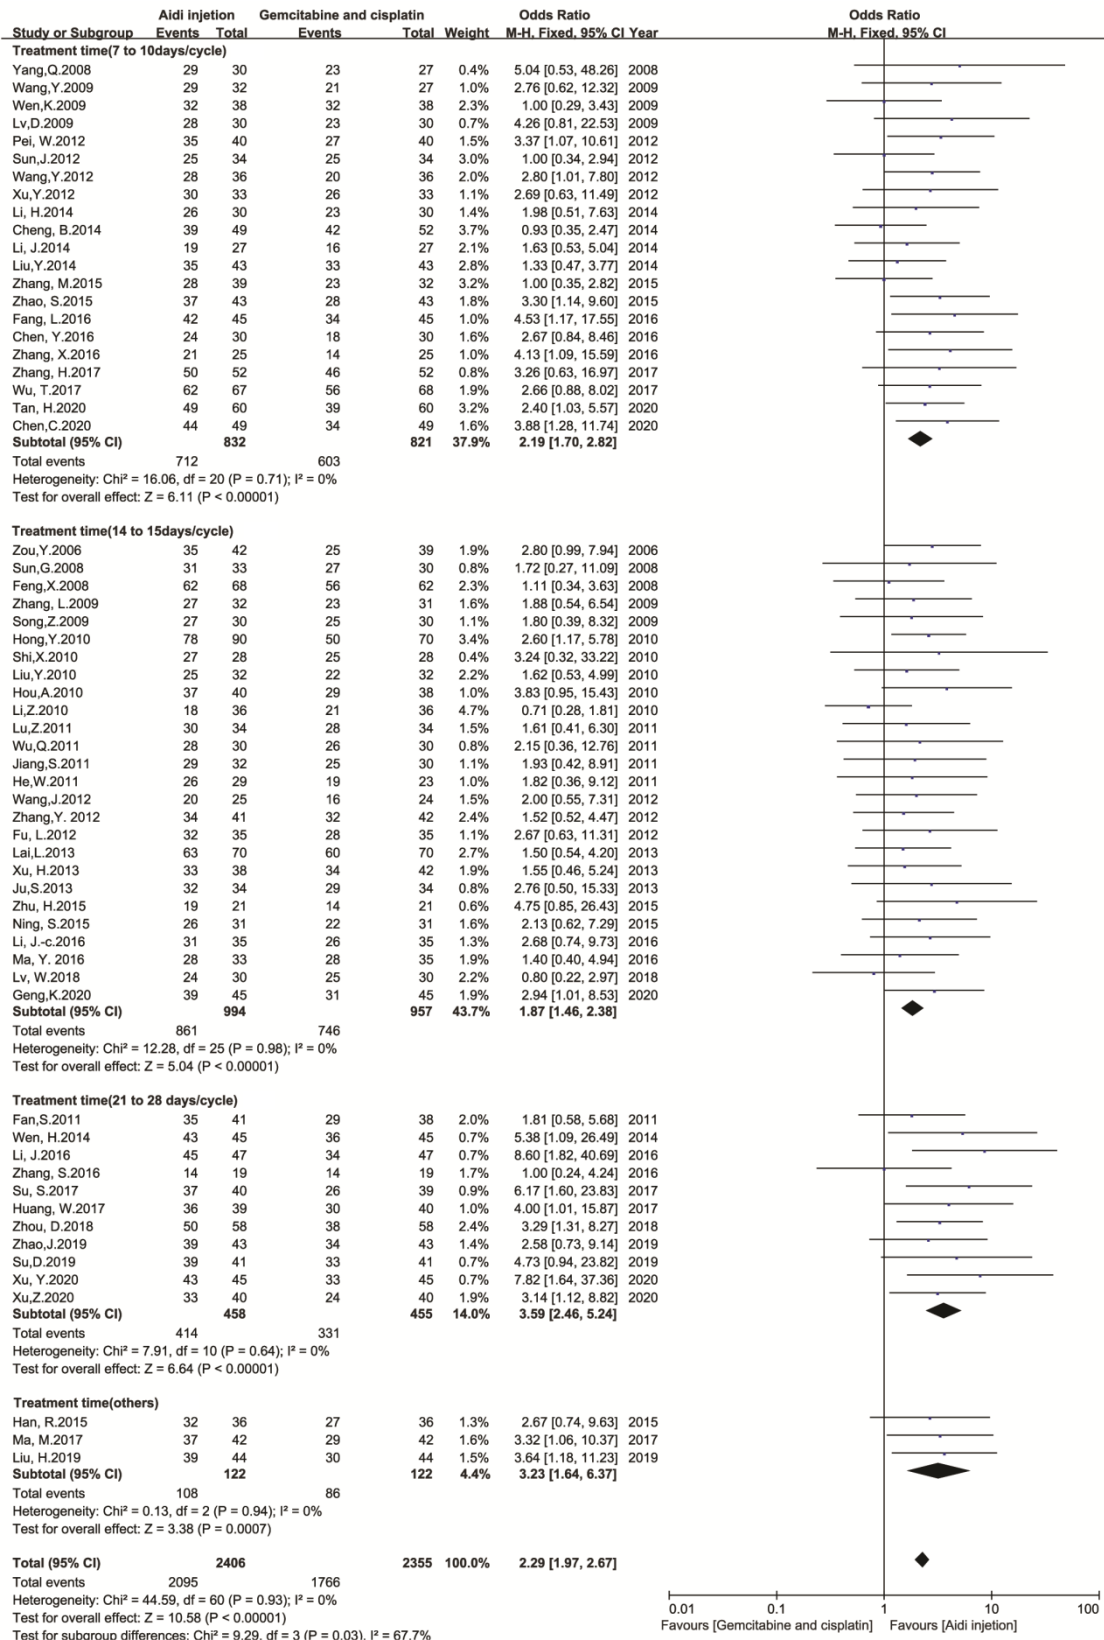

Figure S77 Subgroups analysis of disease control rate by treatment time

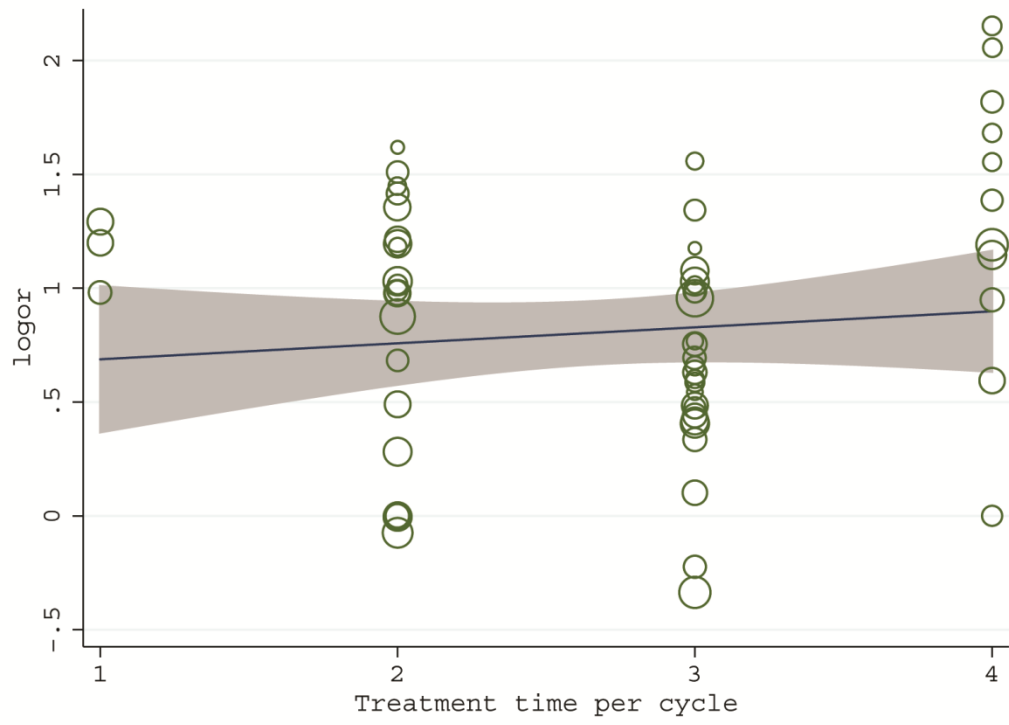

**Figure S78** Meta-regression of disease control rate by treatment time

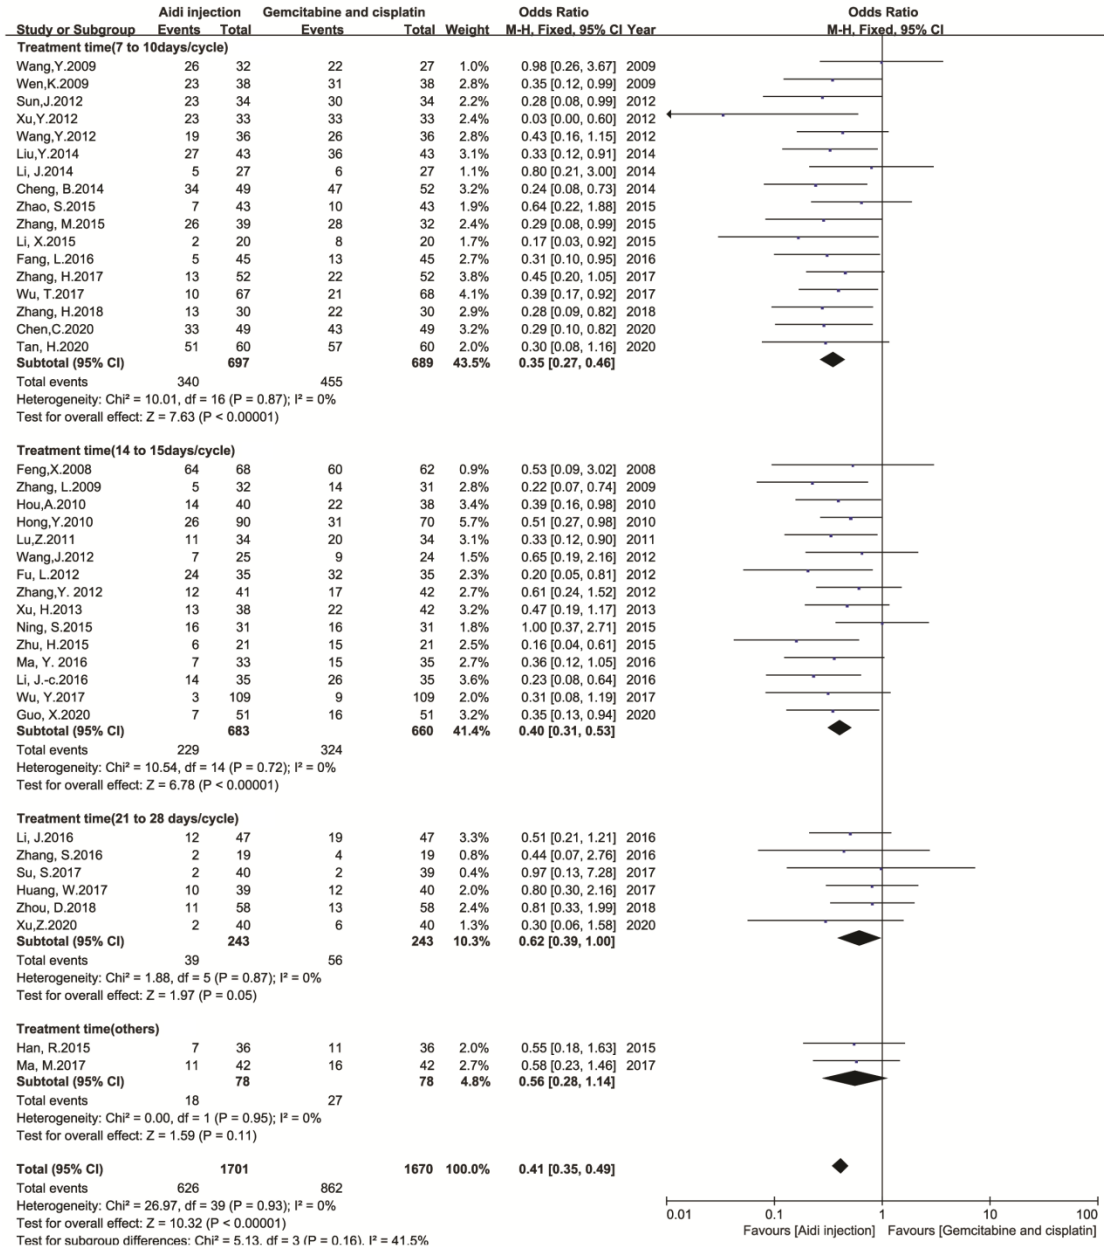

Figure S79 Subgroups analysis of neutropenia by treatment time

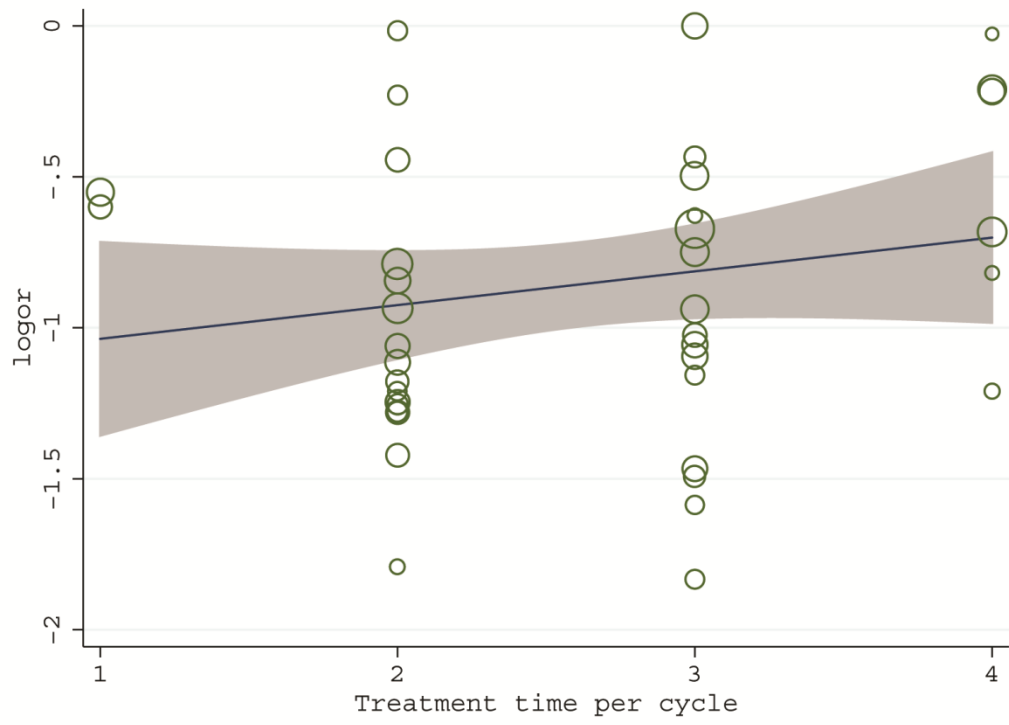

**Figure S80 Meta-regression of neutropenia by treatment time**

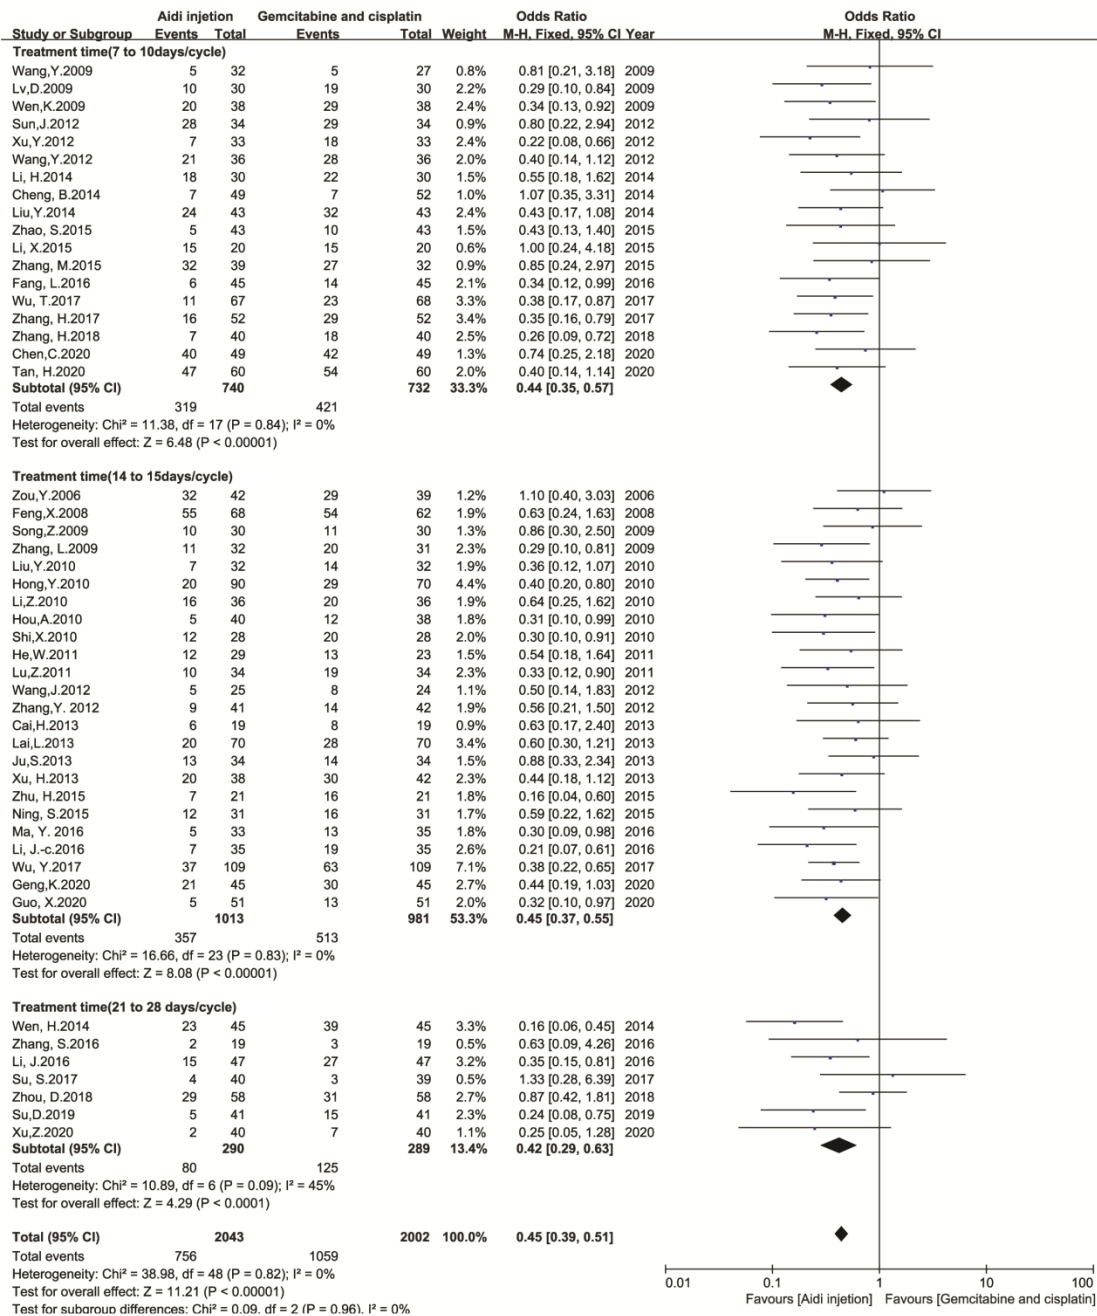

Figure S81 Subgroups analysis of gastrointestinal reaction by treatment time

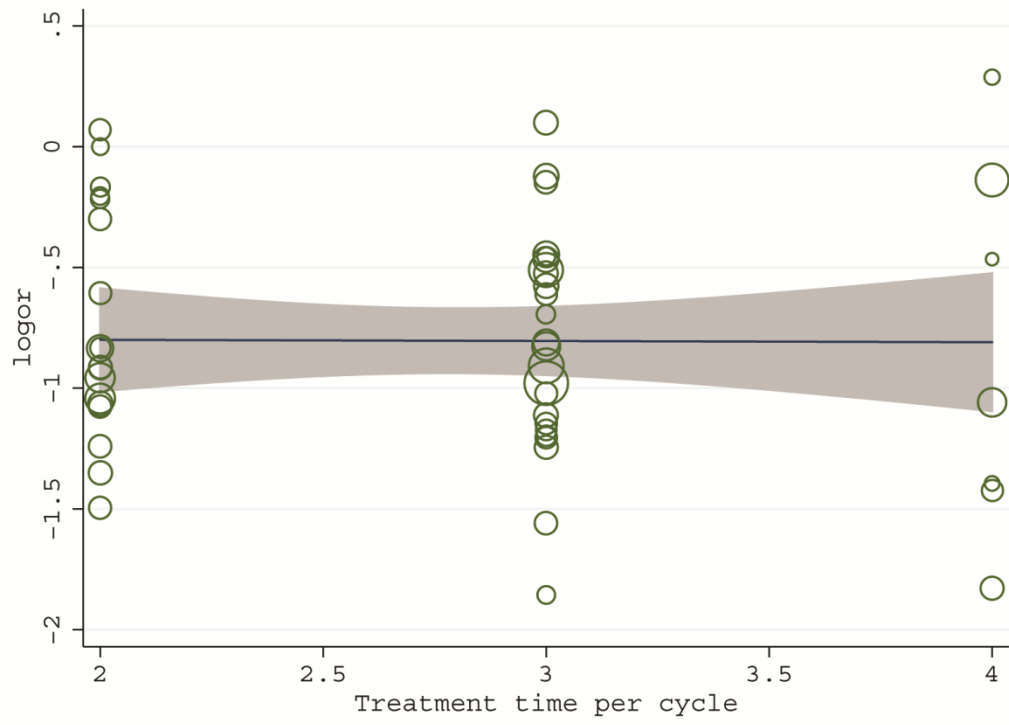

**Figure S82** Meta-regression of gastrointestinal reaction by treatment time



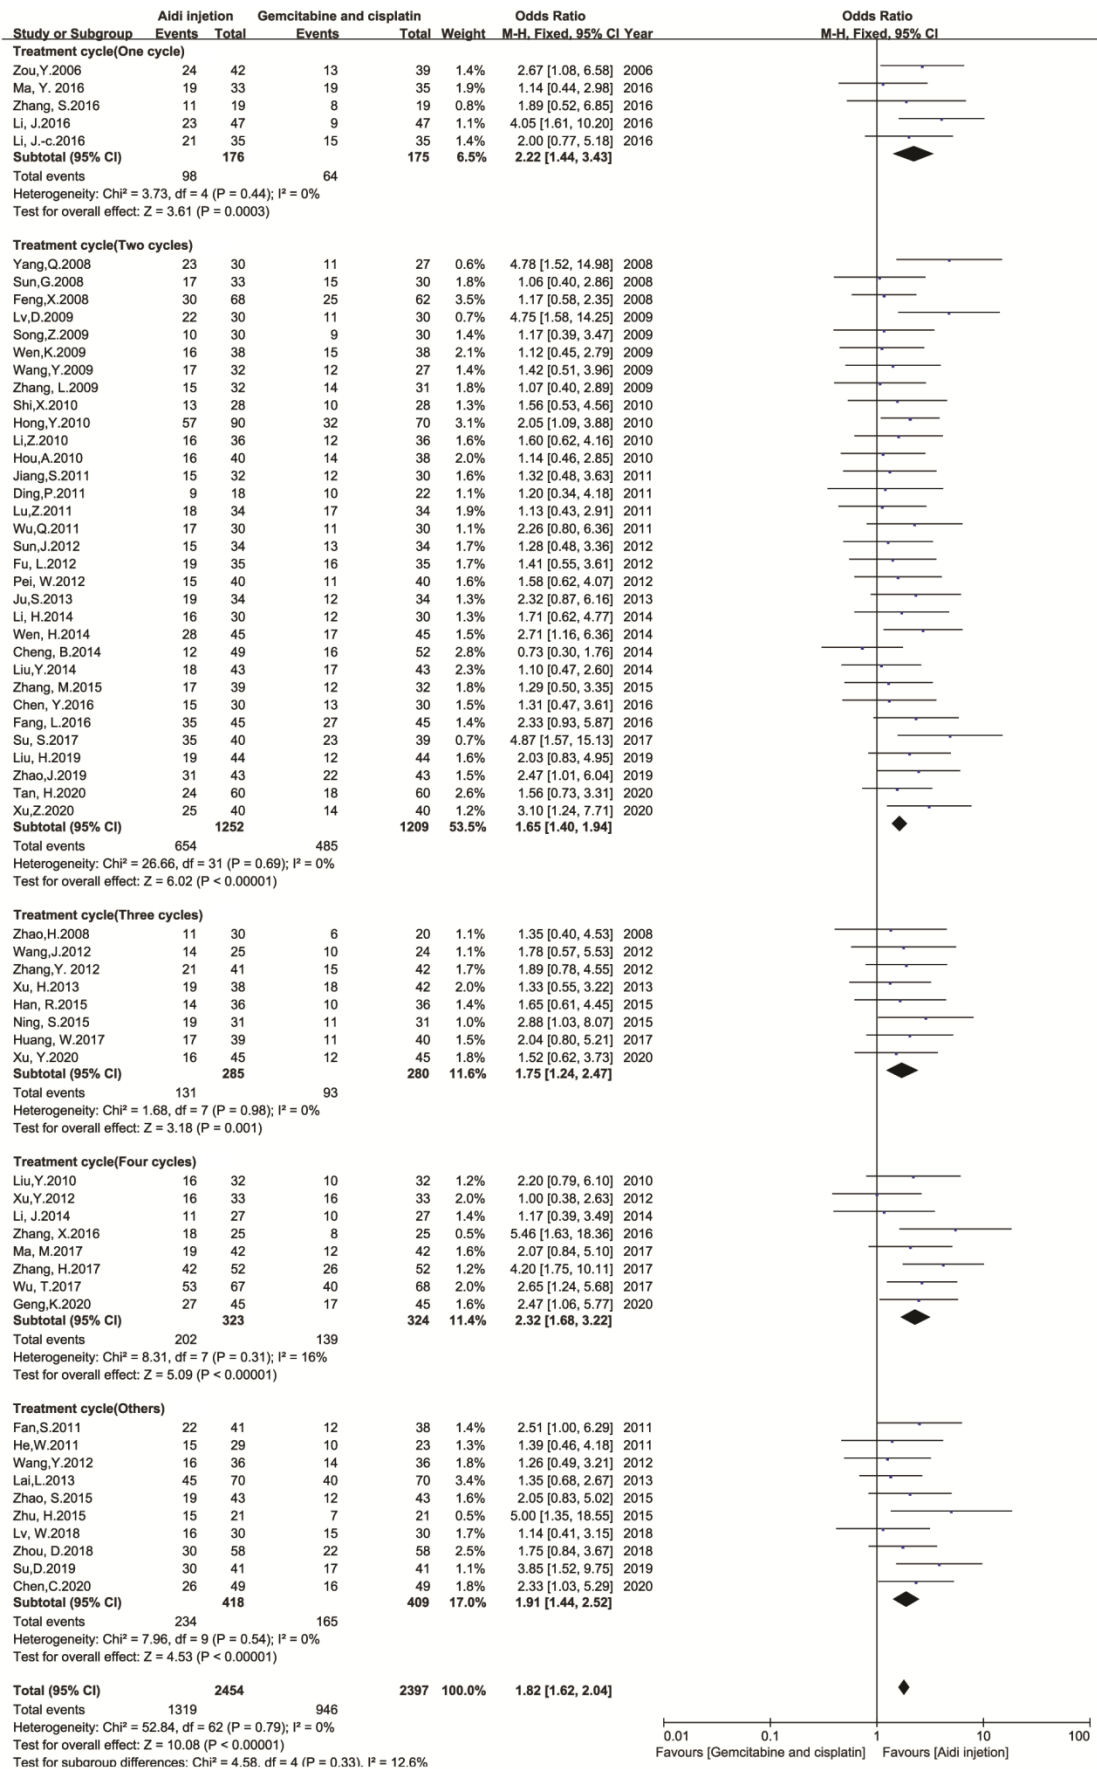

Figure S83 Subgroups analysis of objective response rate by treatment cycle

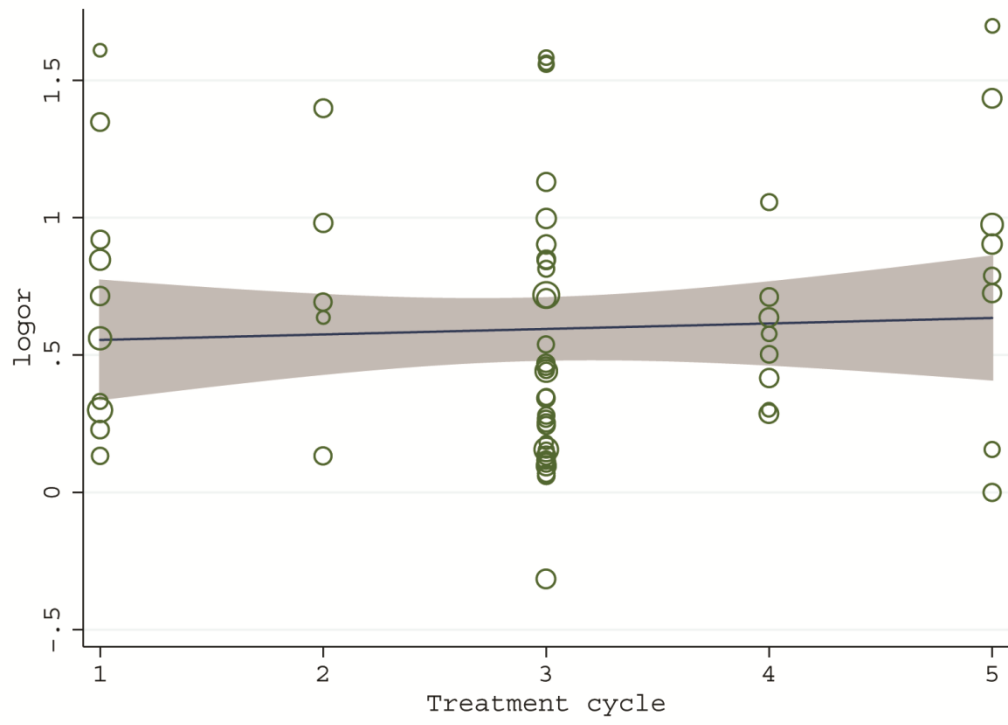

**Figure S84 Meta-regression of objective response rate by treatment cycle**

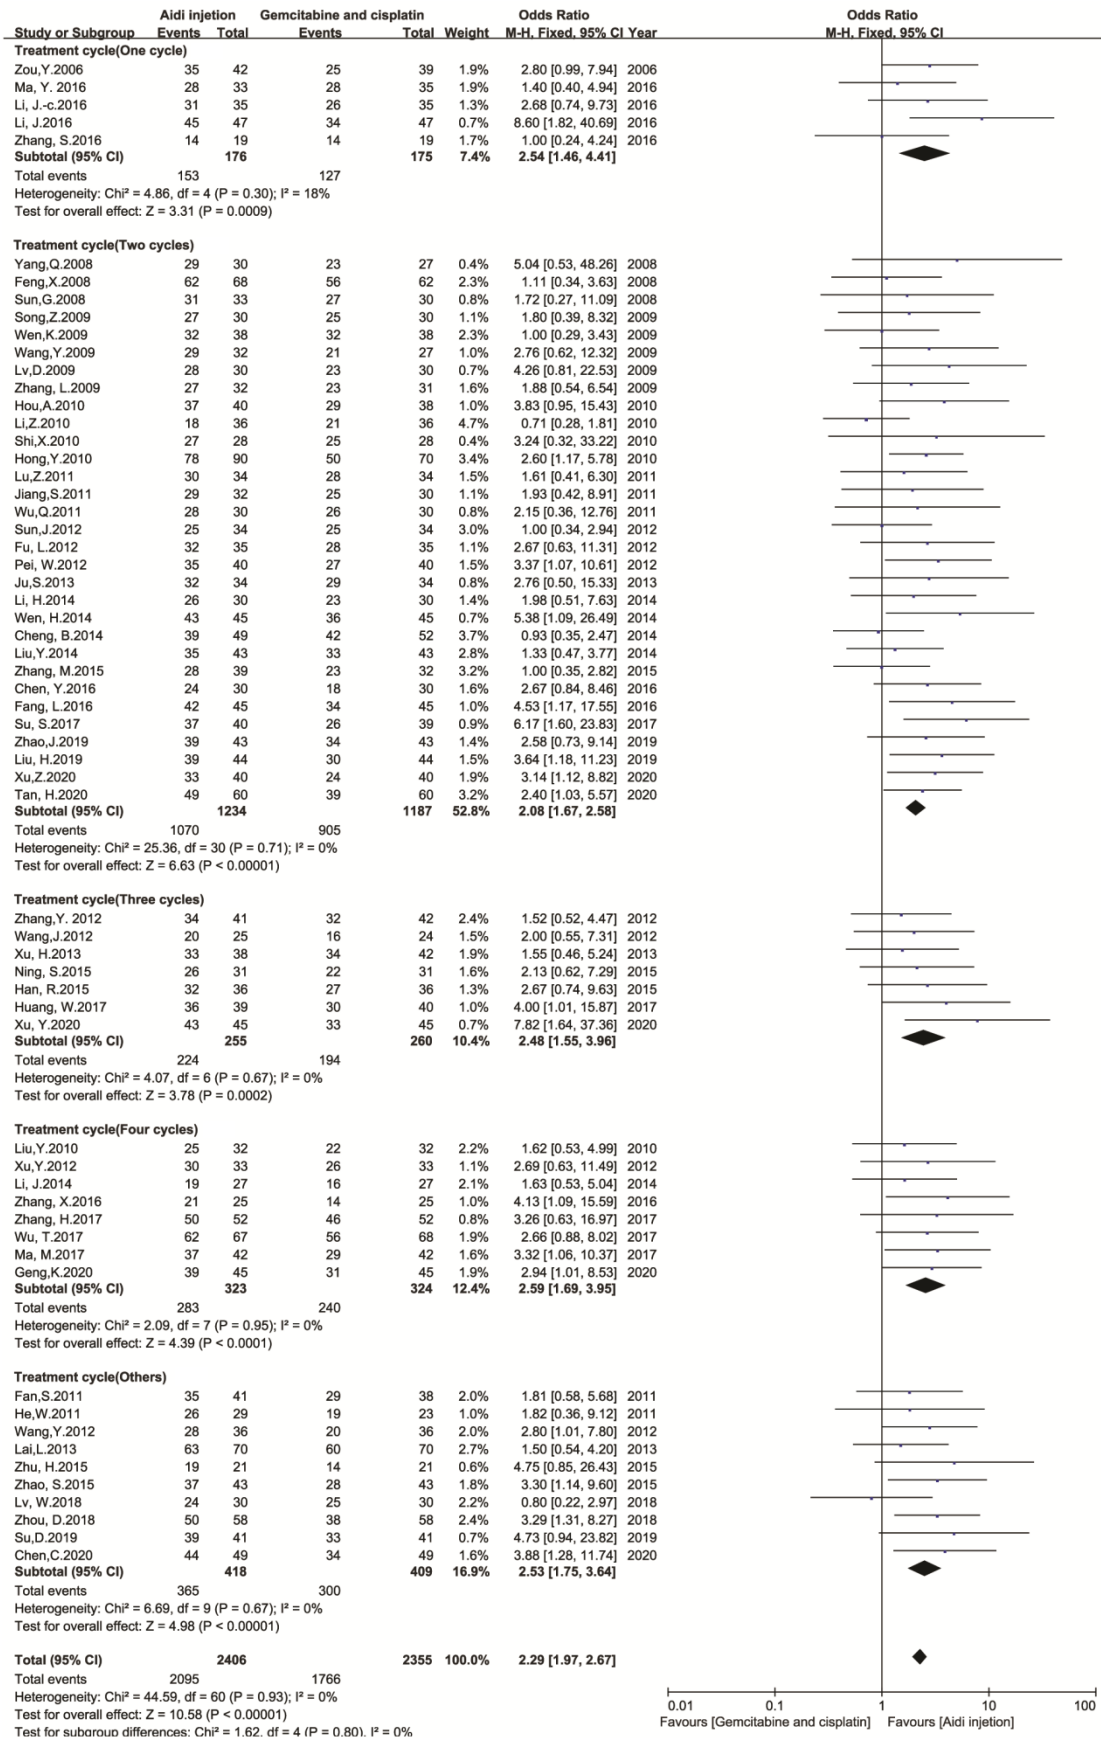

Figure S85 Subgroups analysis of disease control rate by treatment cycles

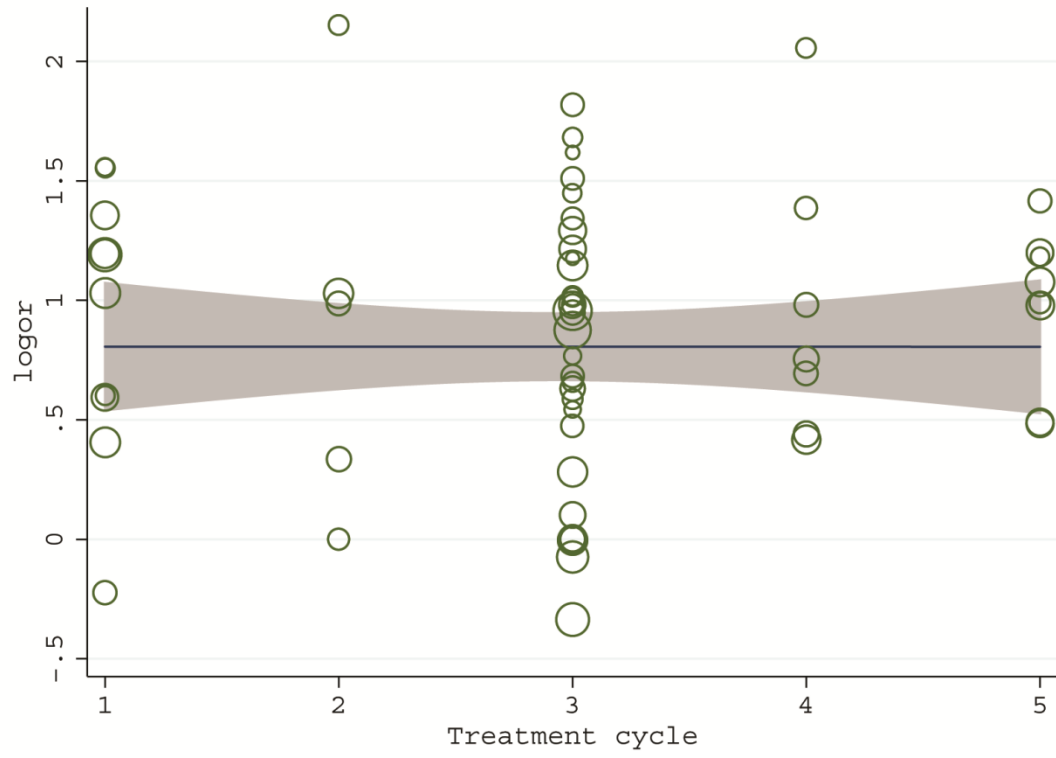

**Figure S86** Meta-regression of disease control rate by treatment cycle

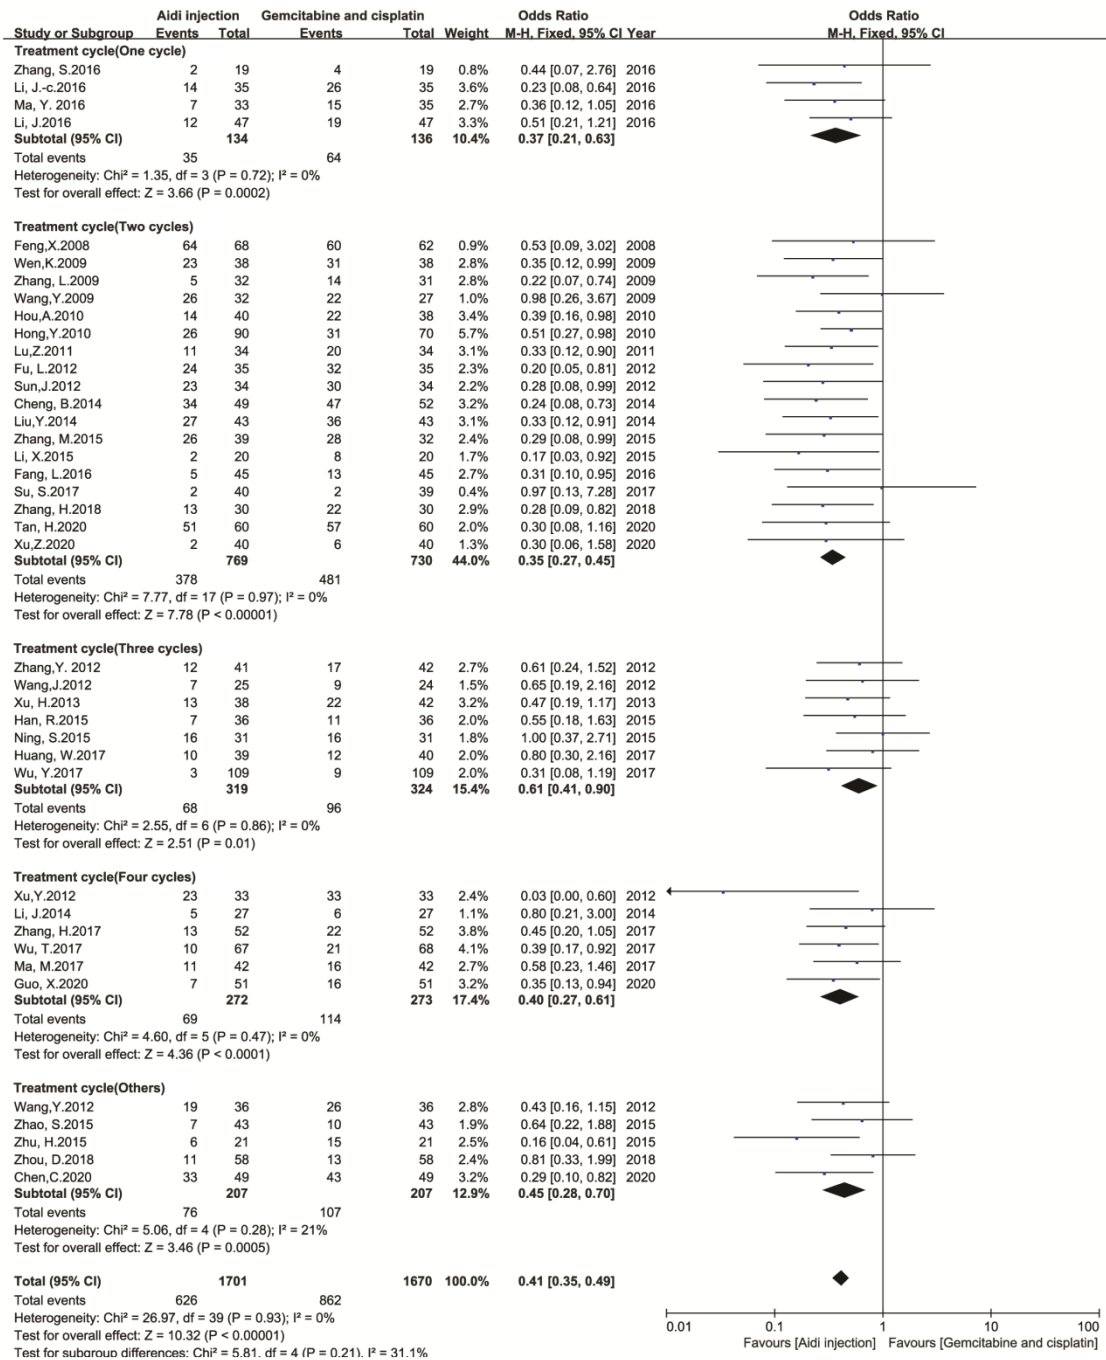

**Figure S87 Subgroups analysis of neutropenia by treatment cycle**

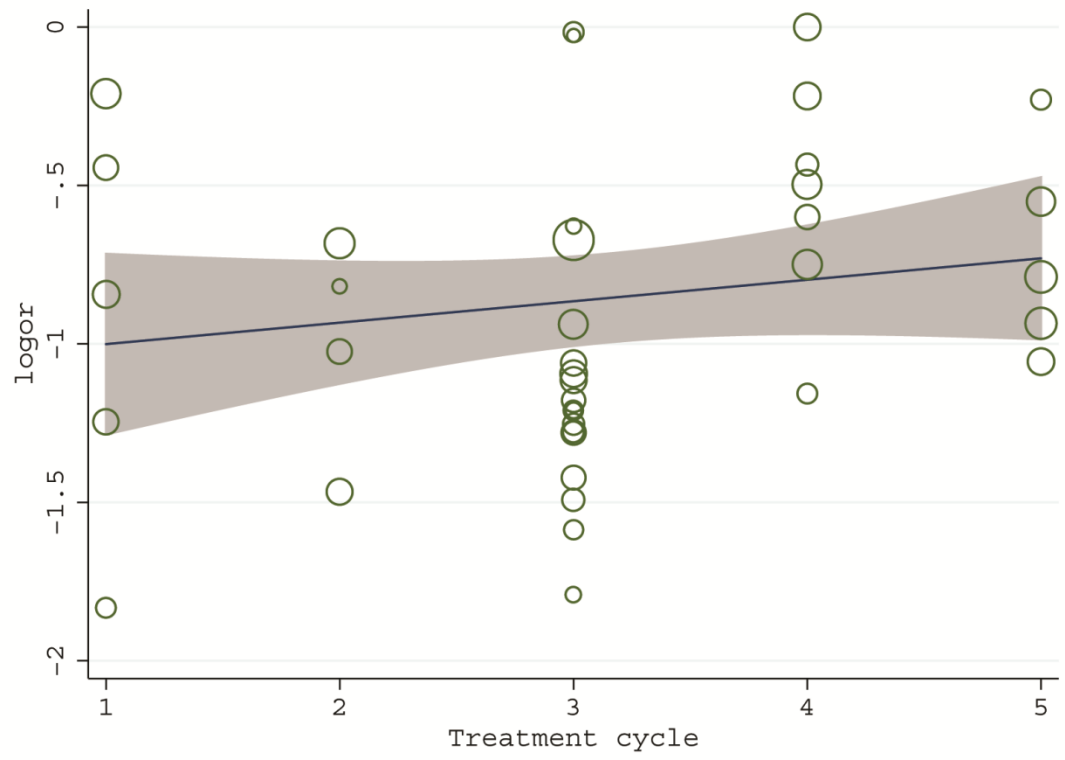

**Figure S88** Meta-regression of neutropenia by treatment cycle

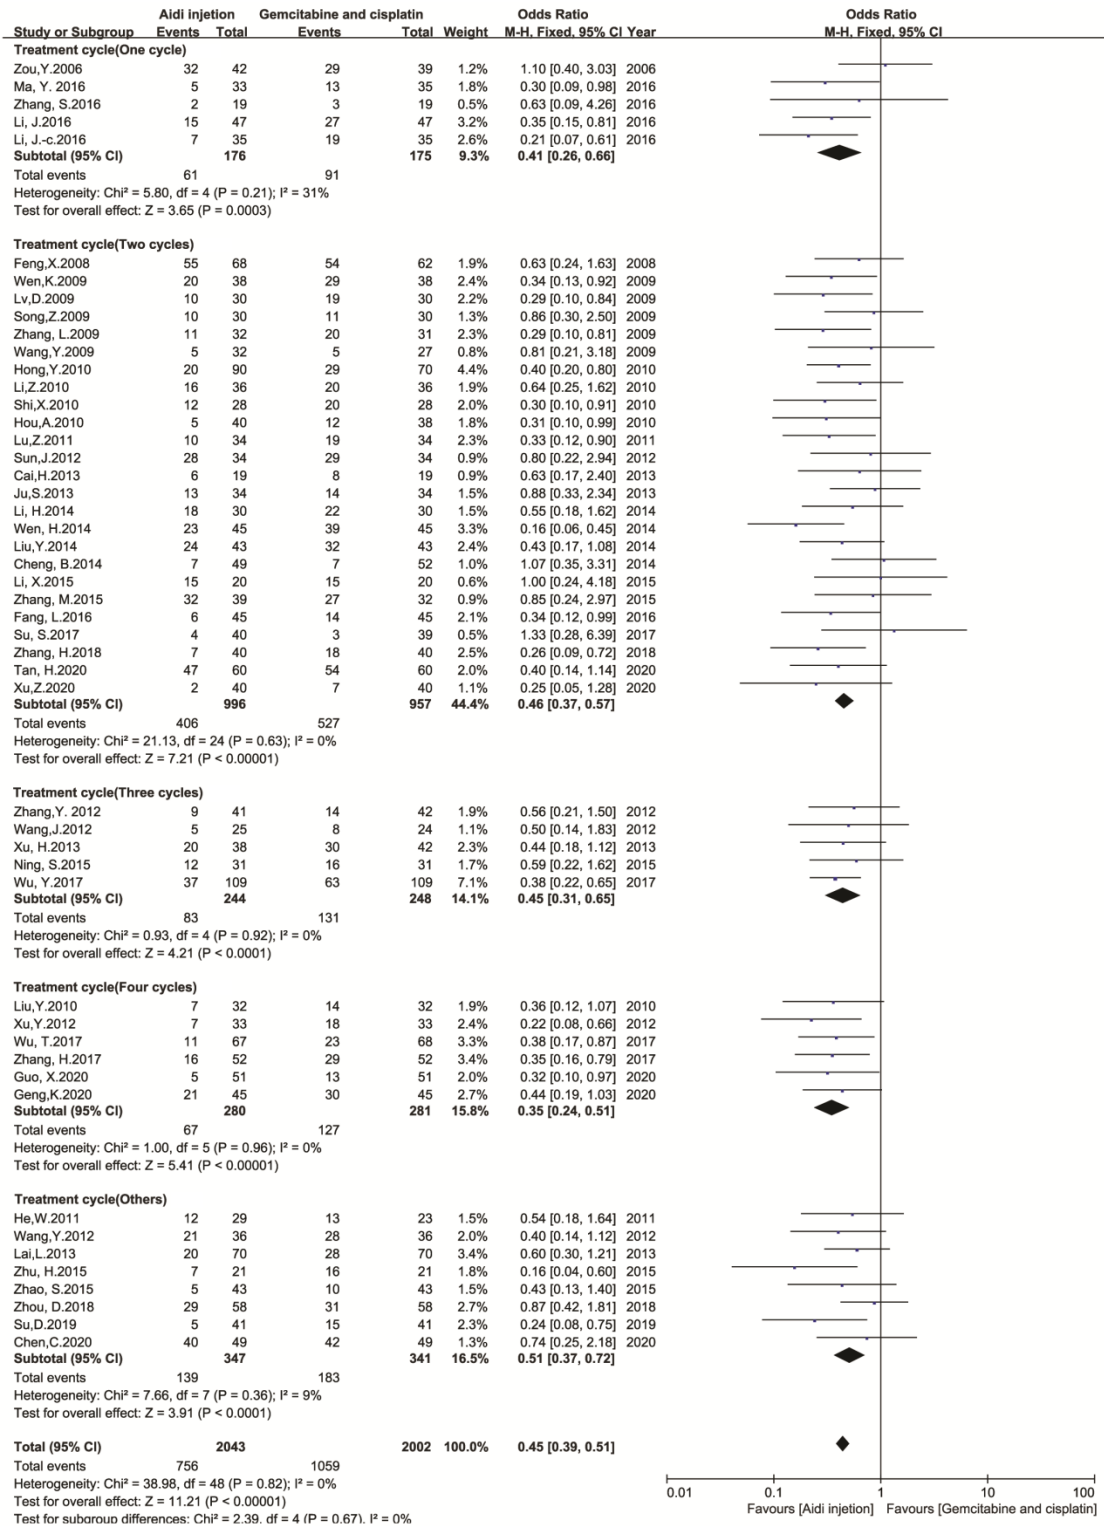

Figure S89 Subgroups analysis of gastrointestinal reaction by treatment cycle

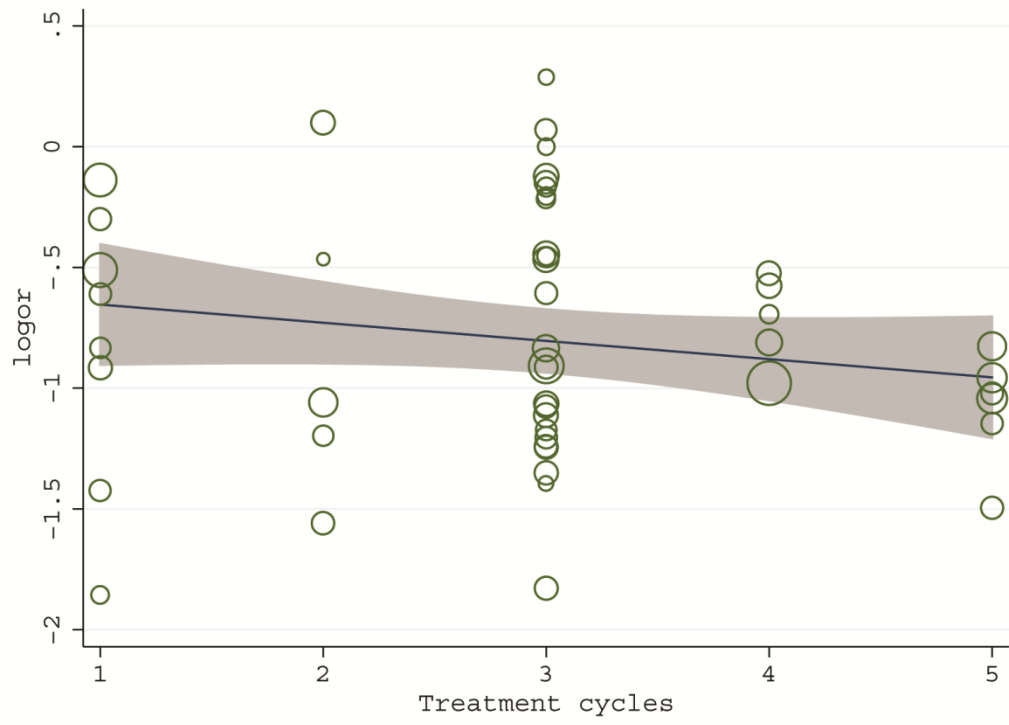

**Figure S90** Meta-regression of gastrointestinal reaction by treatment cycle



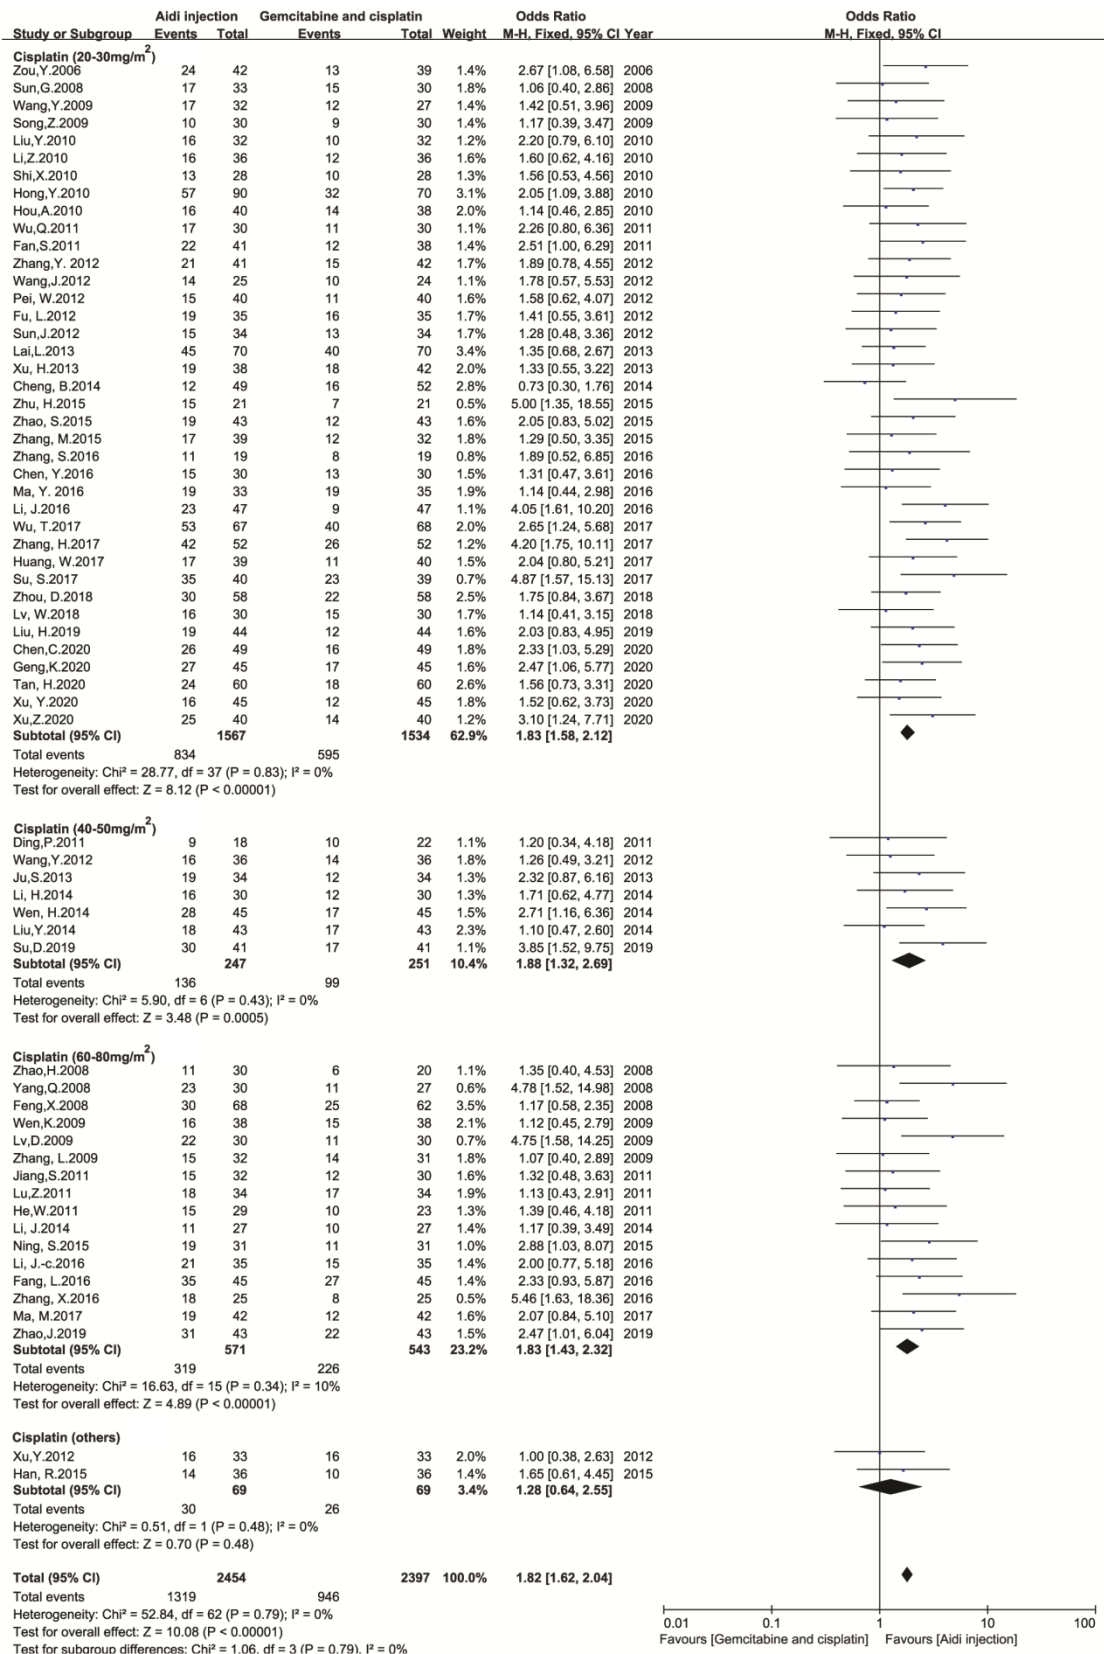

Figure S91 Subgroups analysis of objective response rate by cisplatin dosage

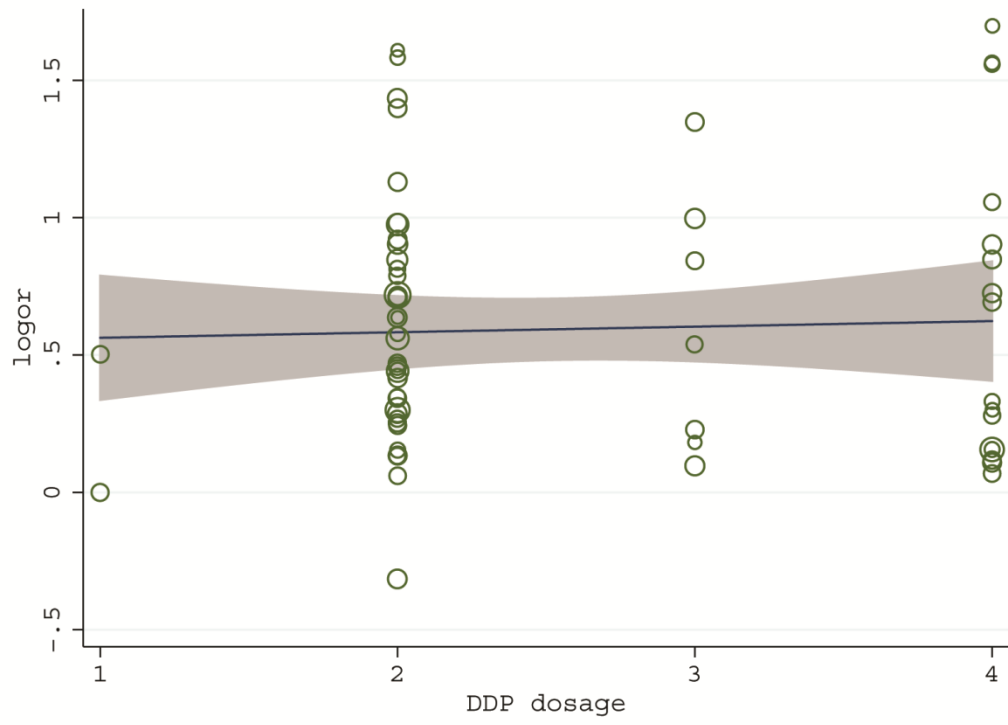

**Figure S92 Meta-regression of objective response rate by cisplatin dosage**

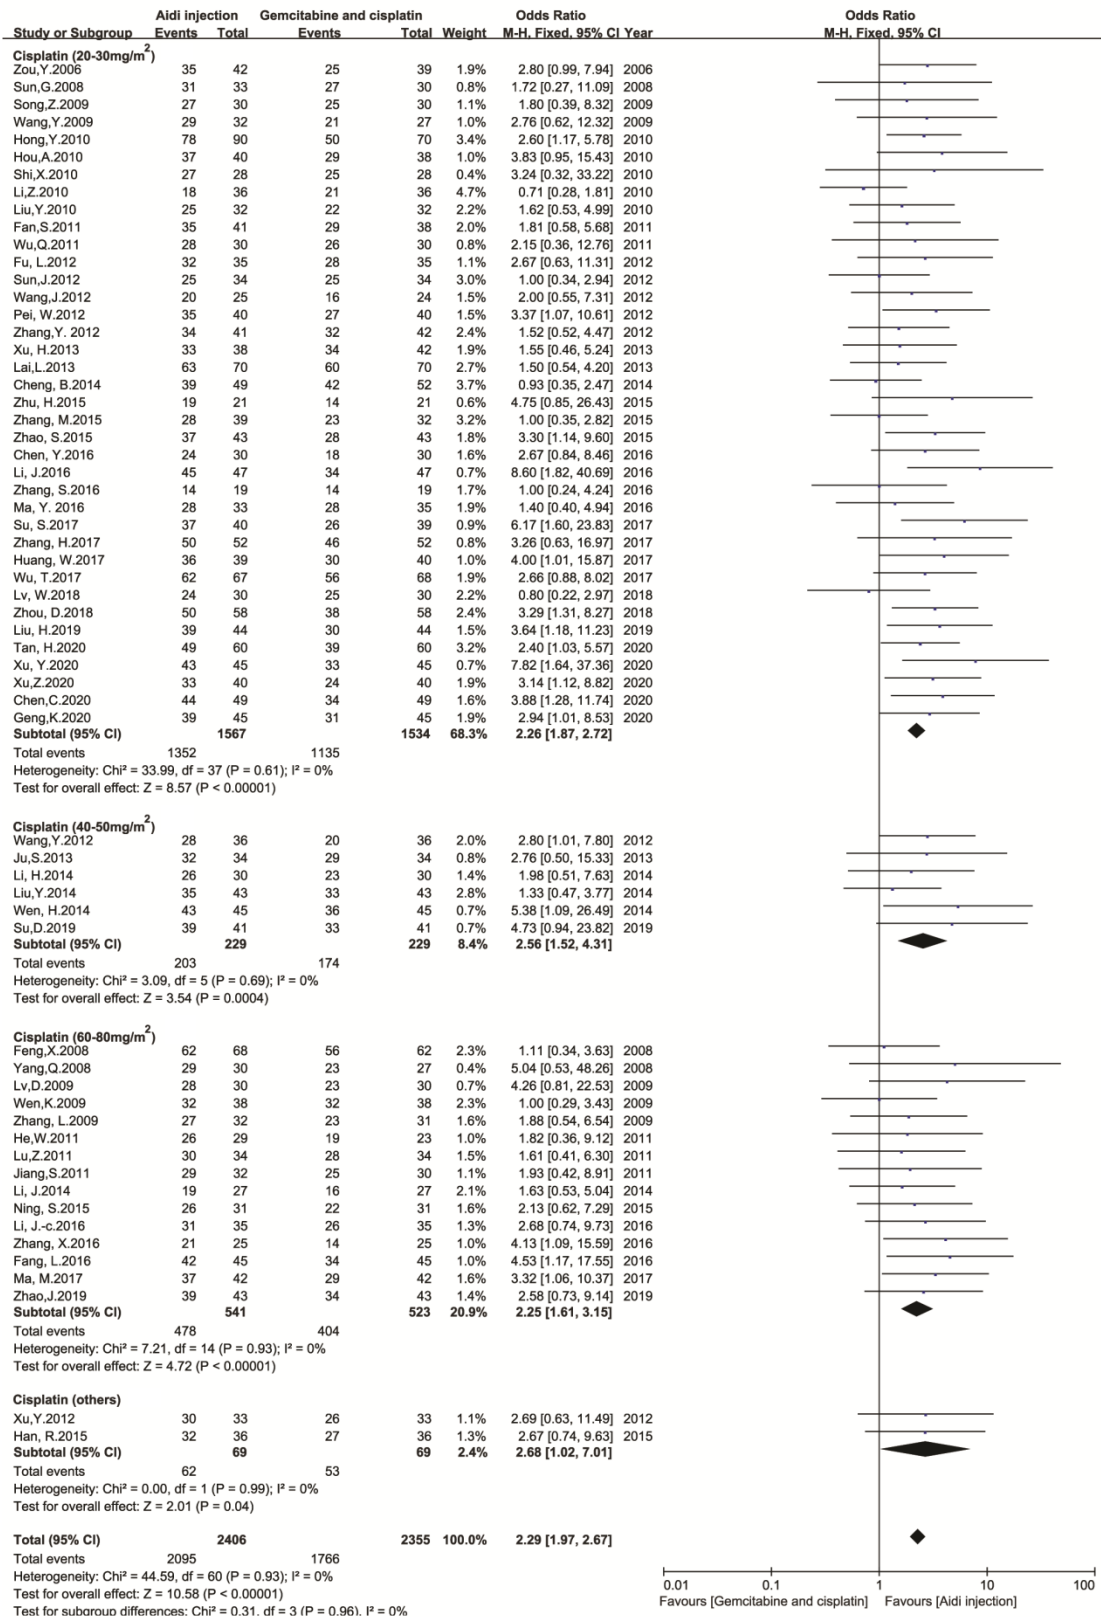

Figure S93 Subgroups analysis of disease control rate by cisplatin dosage

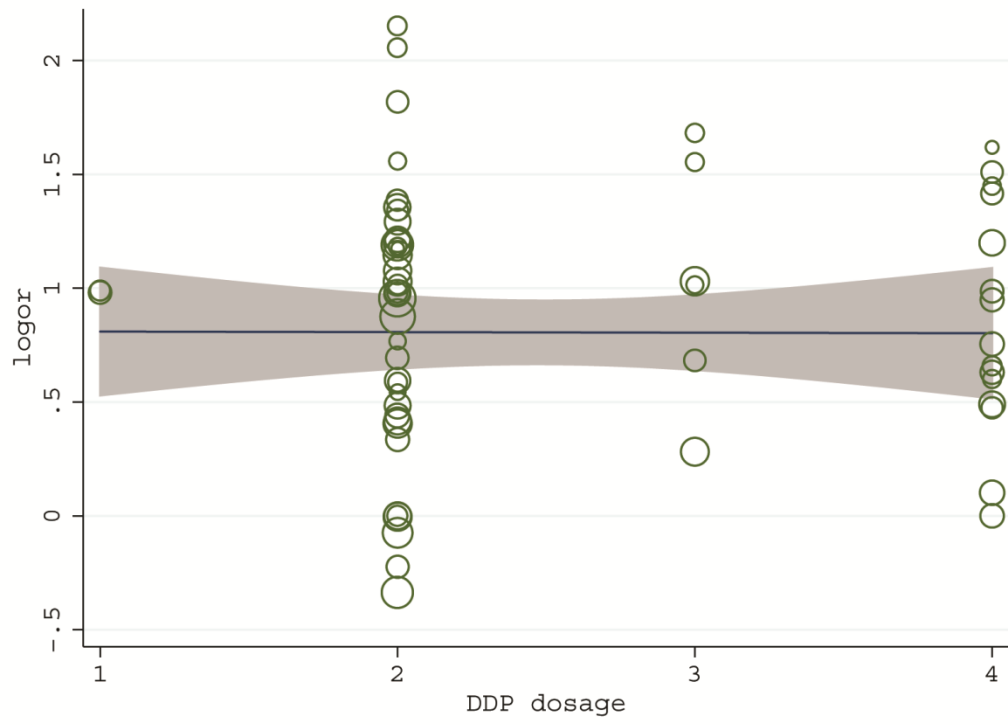

**Figure S94** Meta-regression of disease control rate by cisplatin dosage

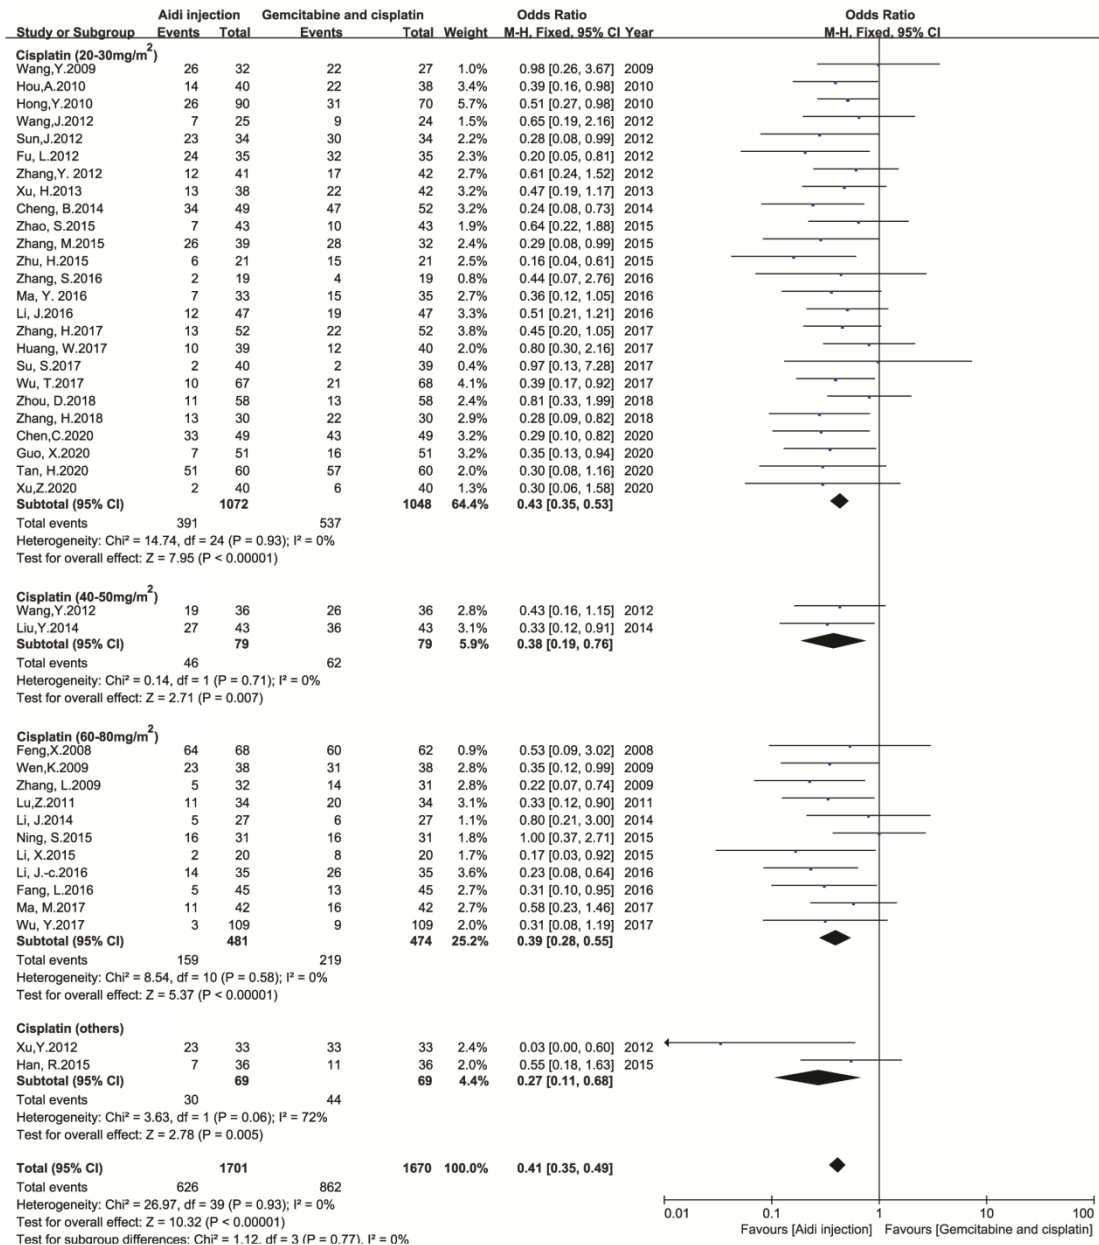

Figure S95 Subgroups analysis of neutropenia by cisplatin dosage

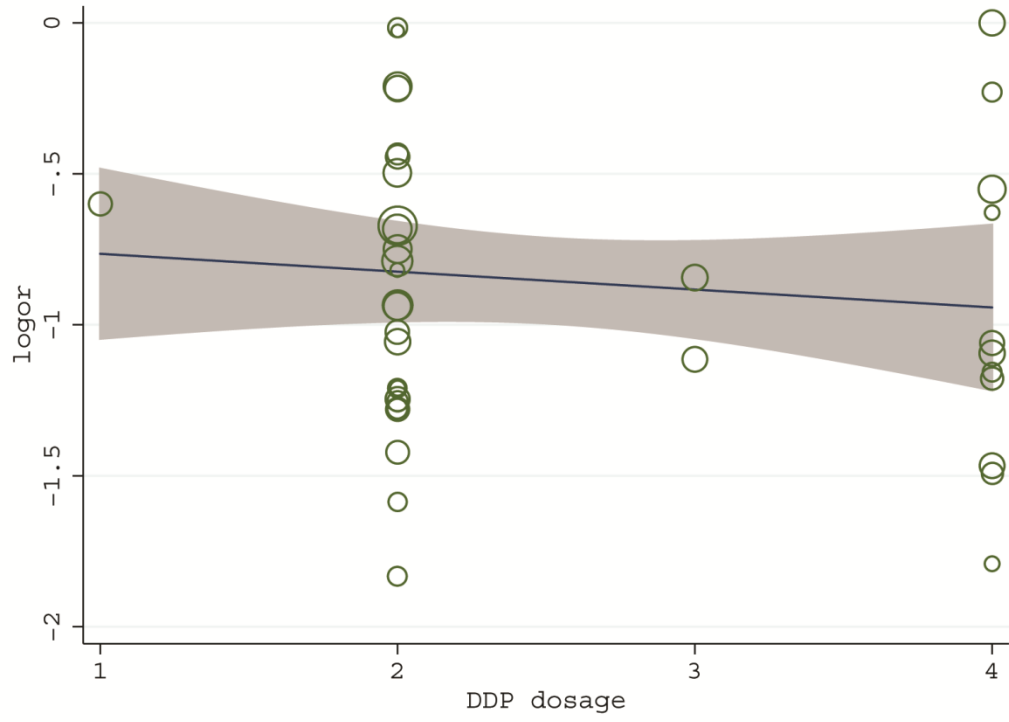

**Figure S96 Meta-regression of neutropenia by cisplatin dosage**

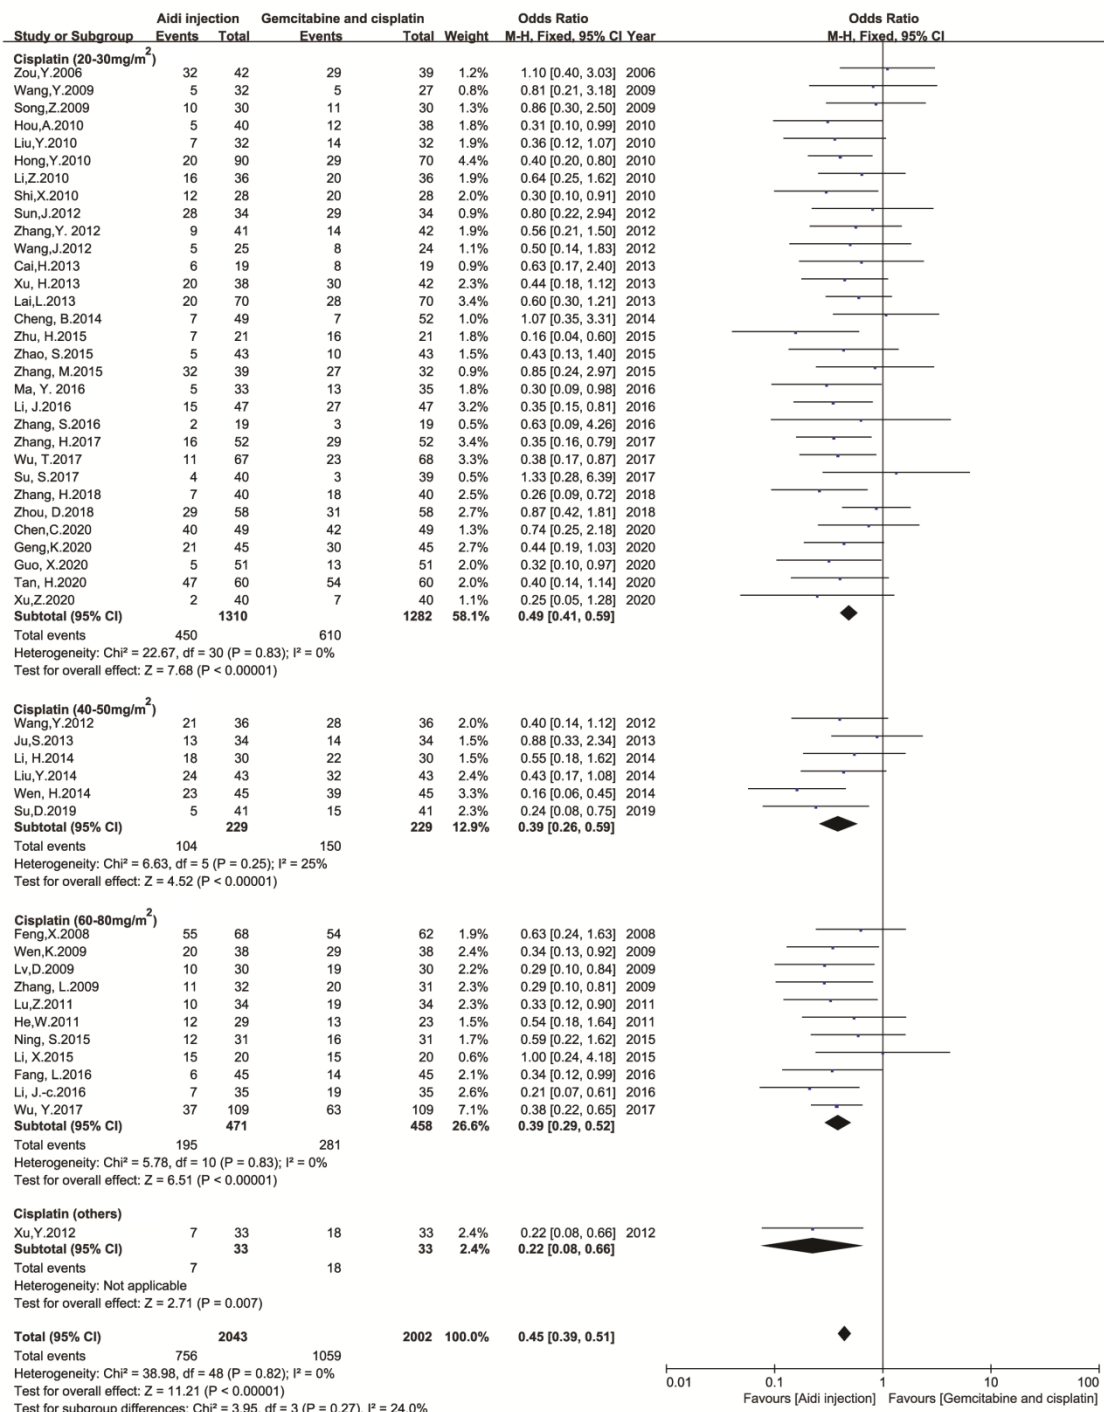

Figure S97 Subgroups analysis of gastrointestinal reaction by cisplatin dosage

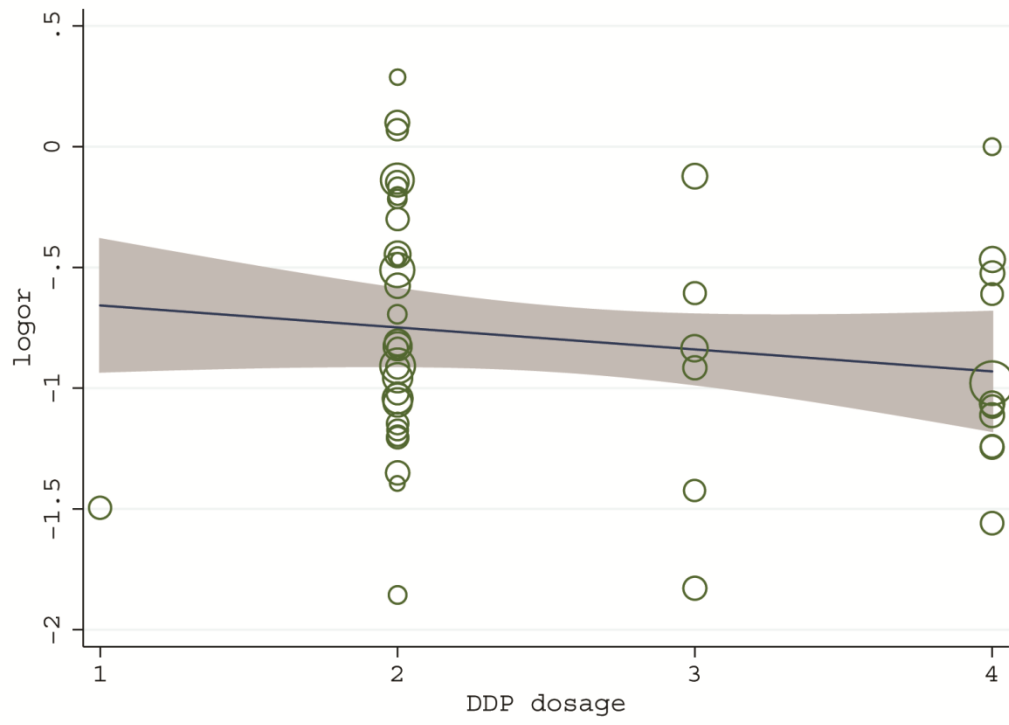

**Figure S98** Meta-regression of gastrointestinal reaction by cisplatin dosage



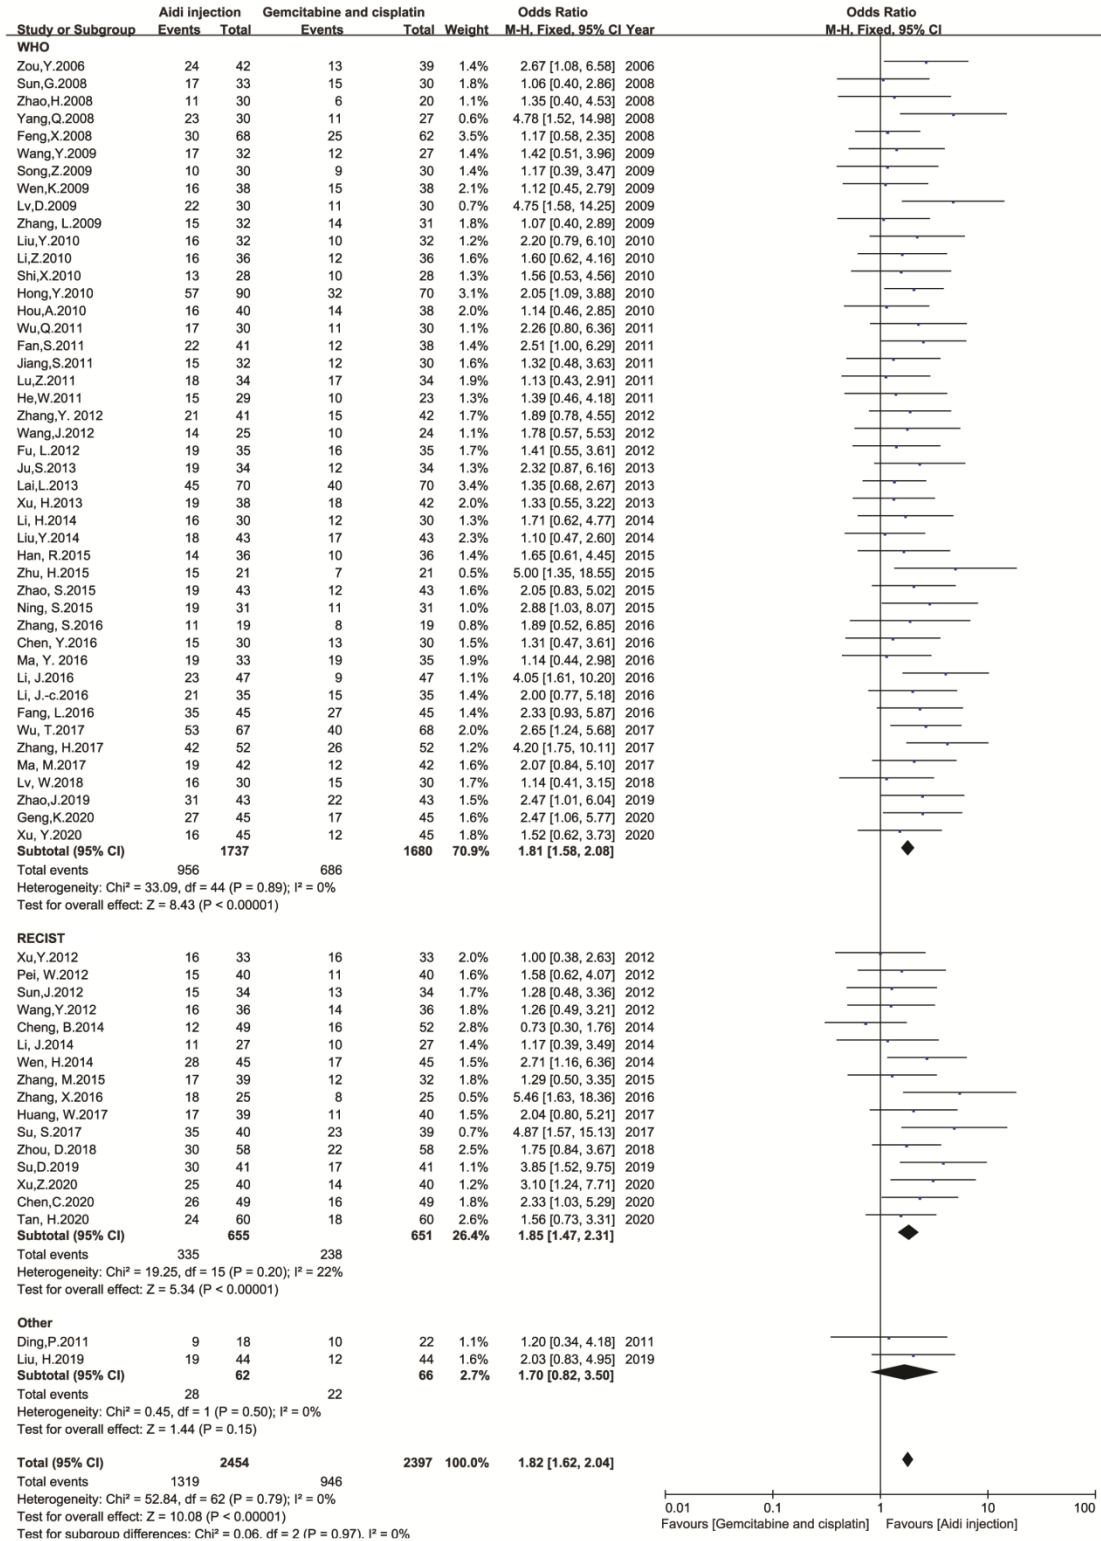

Figure S99 Subgroups analysis of objective response rate by evaluation criteria

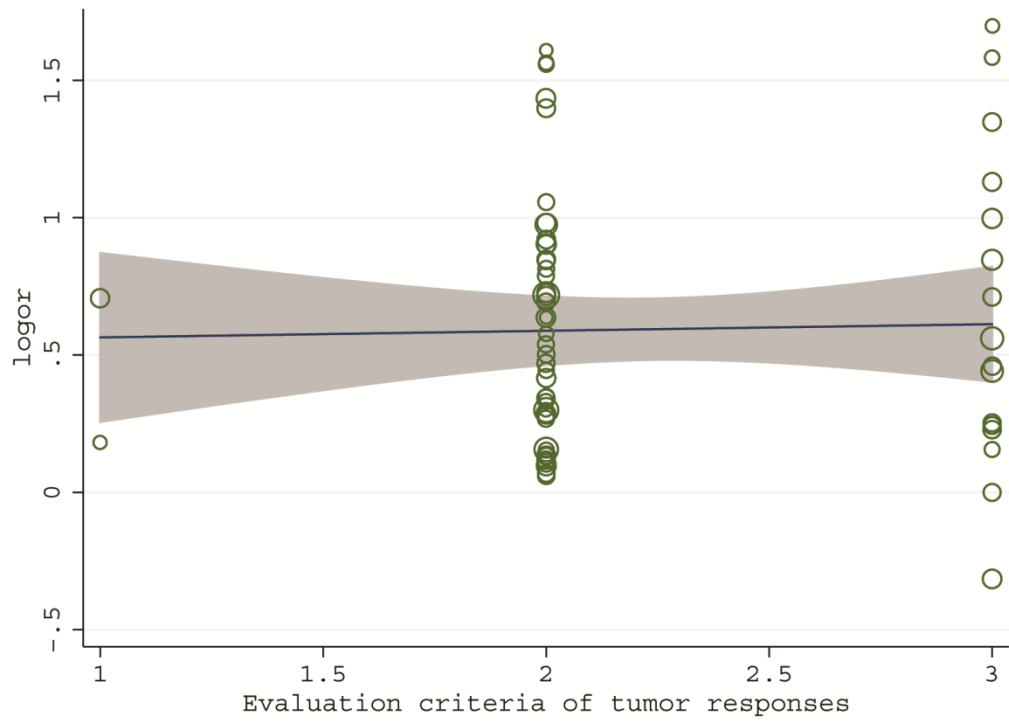

**Figure S100 Meta-regression of objective response rate by evaluation criteria**

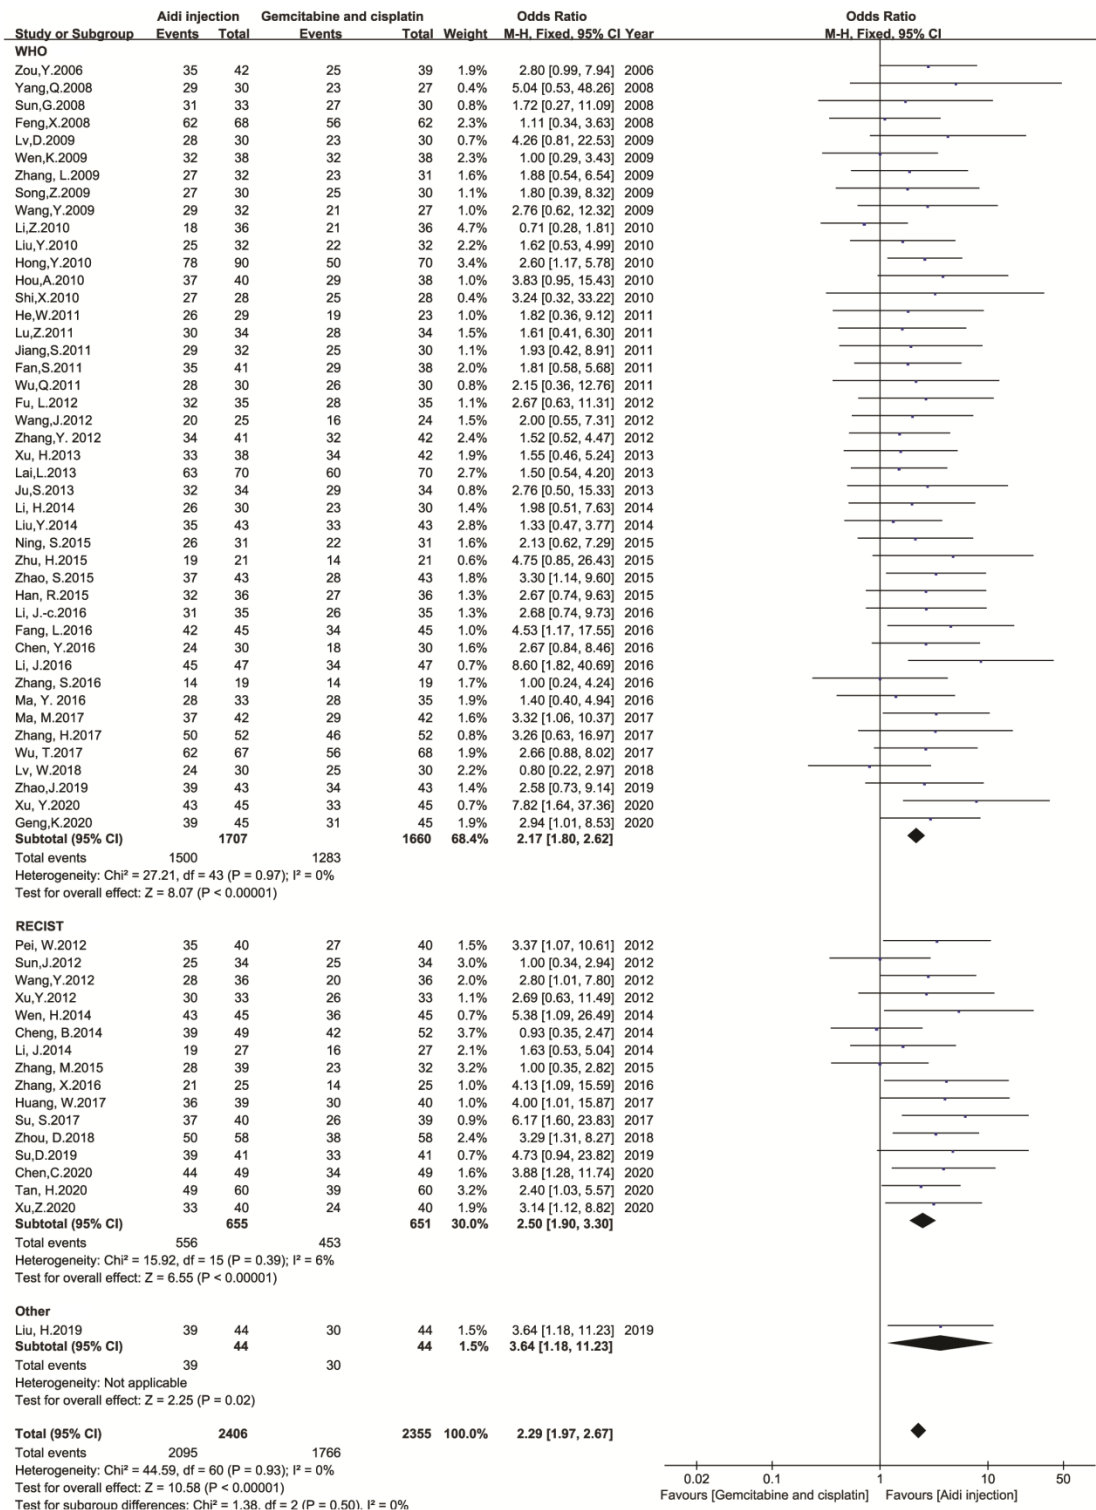

Figure S101 Subgroups analysis of disease control rate by evaluation criteria

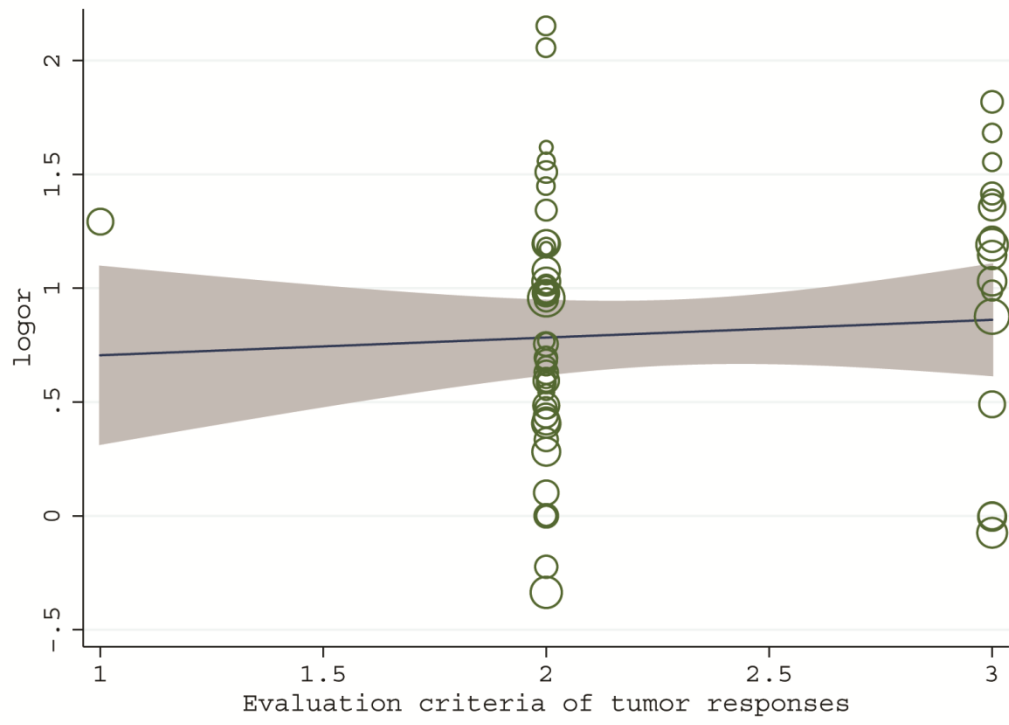

**Figure S102 Meta-regression of disease control rate by evaluation criteria**

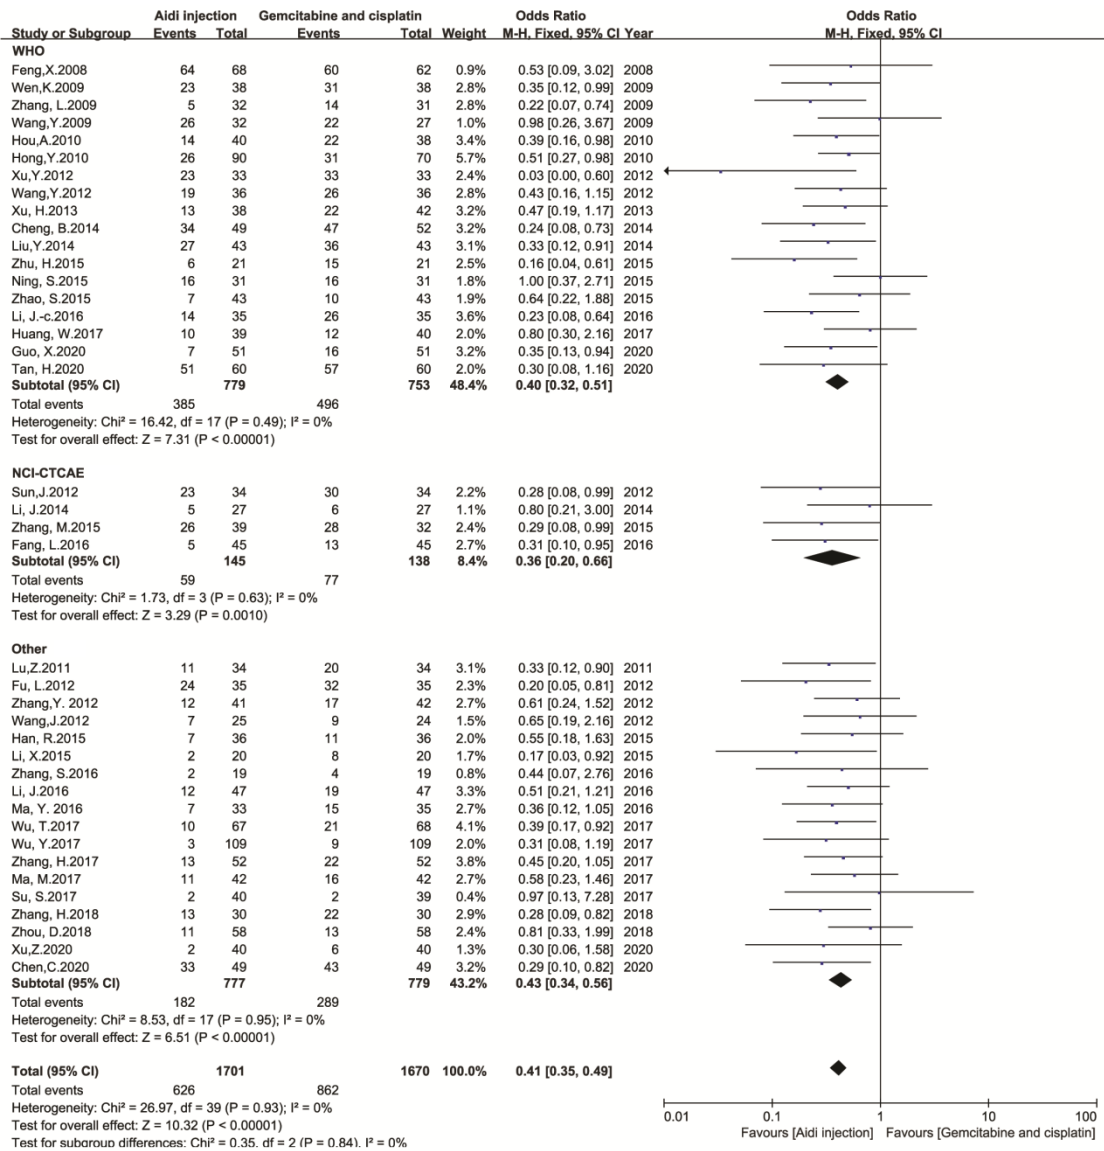

**Figure S103 Subgroups analysis of neutropenia by evaluation criteria**

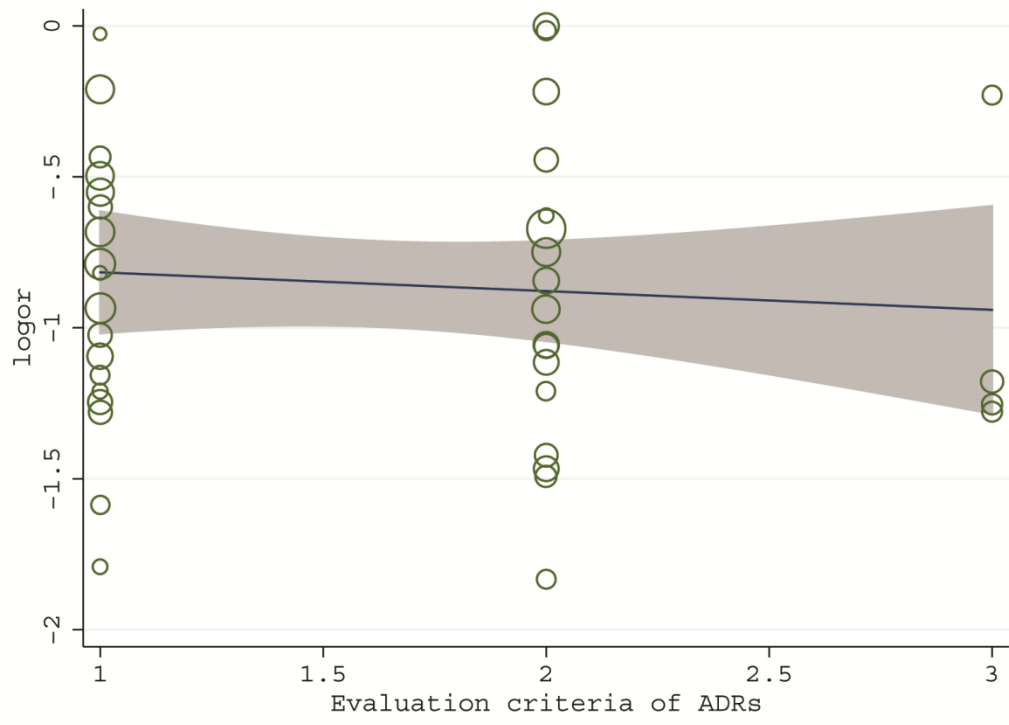

**Figure S104 Meta-regression of neutropenia by evaluation criteria**

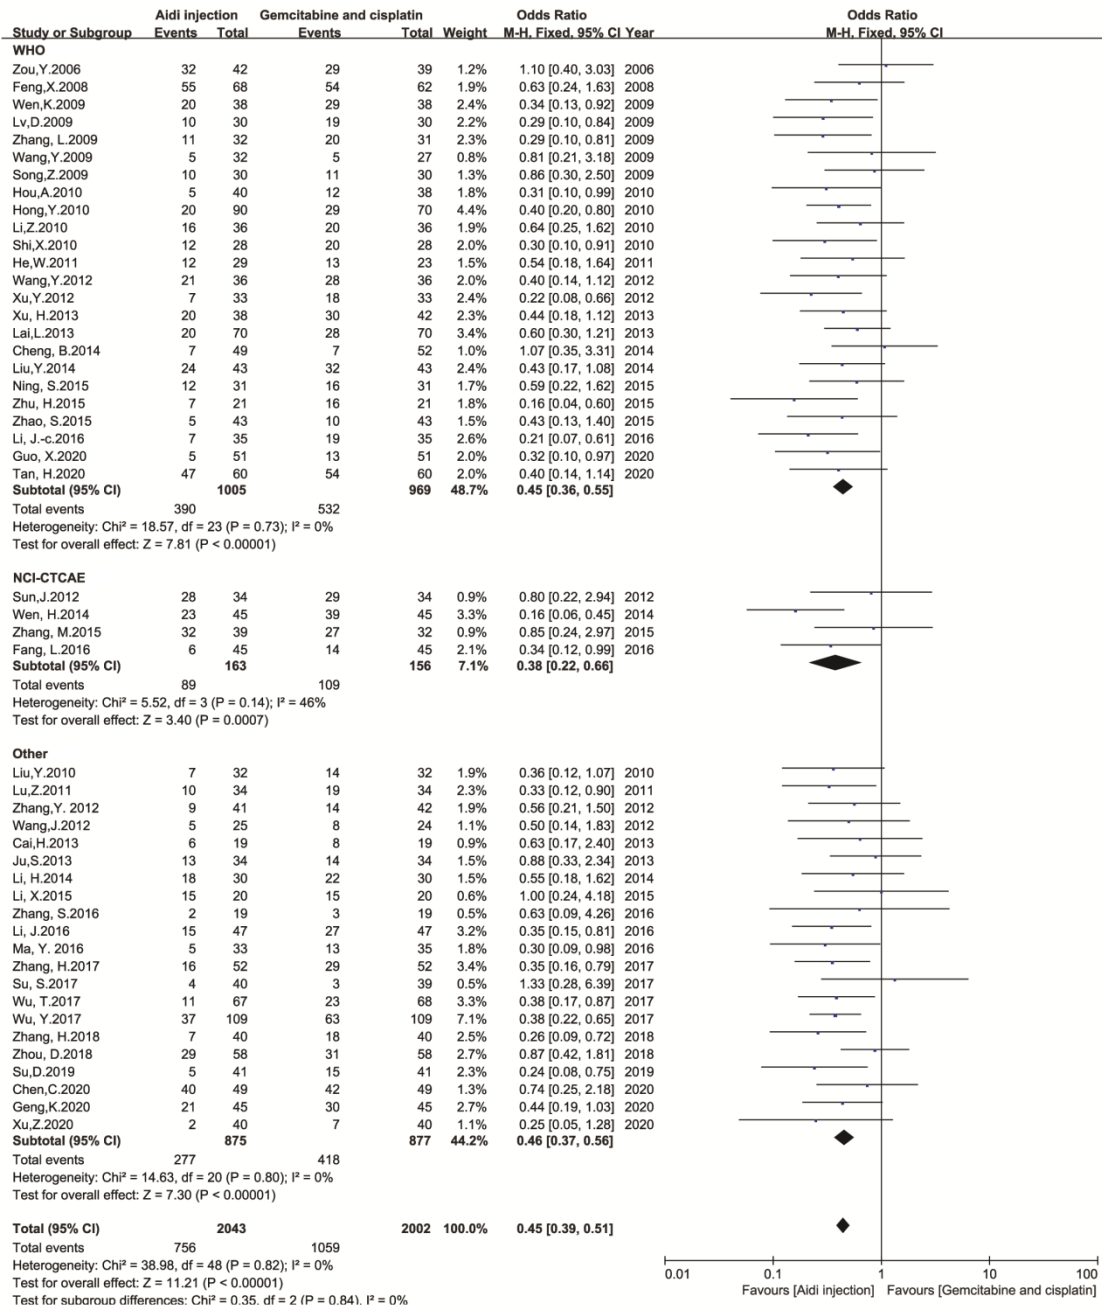

Figure S105 Subgroups analysis of gastrointestinal reaction by evaluation criteria

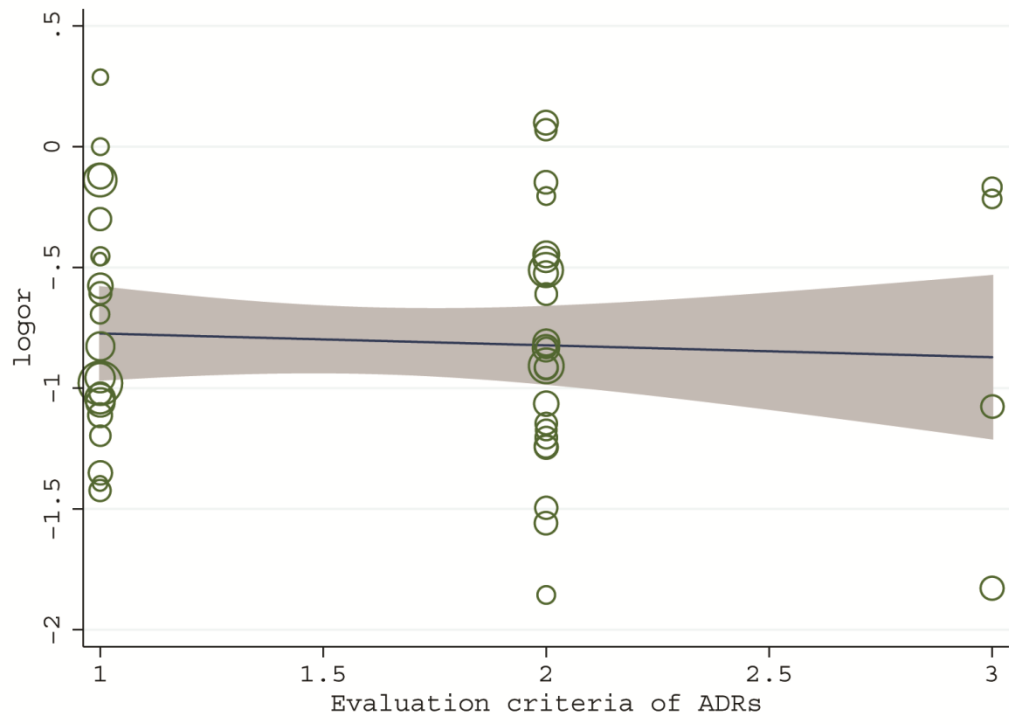

**Figure S106 Meta-regression of gastrointestinal reaction by evaluation criteria**
